# Supplementary material for: Tissue metabolic profiling reveals major metabolic alteration in colorectal cancer
Source: Royal Society of Chemistry journal article supplement (doi:10.1039/d1mo00022e), 2021-03-26
Supplement: d1mo00022e1.xlsx [file d1mo00022e1.xlsx]

## Sheet: OrigScale (tissue)
													SAMPLE_NAME	SH-SJTU-04670	SH-SJTU-04671	SH-SJTU-04672	SH-SJTU-04673	SH-SJTU-04674	SH-SJTU-04675	SH-SJTU-04676	SH-SJTU-04677	SH-SJTU-04678	SH-SJTU-04679	SH-SJTU-04680	SH-SJTU-04681	SH-SJTU-04682	SH-SJTU-04683	SH-SJTU-04684	SH-SJTU-04685	SH-SJTU-04686	SH-SJTU-04687	SH-SJTU-04688	SH-SJTU-04689
													SAMPLE_ID	1000042670	1000042671	1000042672	1000042673	1000042674	1000042675	1000042676	1000042677	1000042678	1000042679	1000042680	1000042681	1000042682	1000042683	1000042684	1000042685	1000042686	1000042687	1000042688	1000042689
													CLIENT_IDENTIFIER	1	2	3	4	5	6	7	8	9	10	11	12	13	14	15	16	17	18	19	20
													SAMPLE_GROUP	healthy	healthy	healthy	healthy	healthy	healthy	healthy	healthy	healthy	healthy	cancer	cancer	cancer	cancer	cancer	cancer	cancer	cancer	cancer	cancer
													TUBE_LABEL	C29639N	C29648N	C29761N	C29788N	C29658N	C29773N	154N	C33256N	156N	158N	C29639T	C29648T	C29761T	C29788T	C29658T	C29773T	C33136T	C33256T	156T	158T
													SUBJECT_ID	C29639	C29648	C29761	C29788	C29658	C29773	154	C33256	156	158	C29639	C29648	C29761	C29788	C29658	C29773	C33136	C33256	156	158
PATHWAY ORDER	BIOCHEMICAL	SUPER_PATHWAY	SUB_PATHWAY	COMP_ID	PLATFORM	CHEMICAL_ID	RI	MASS	CAS	PUBCHEM	CHEMSPIDER	KEGG	Group HMDB_ID	Normal	Normal	Normal	Normal	Normal	Normal	Normal	Normal	Normal	Normal	Tumor	Tumor	Tumor	Tumor	Tumor	Tumor	Tumor	Tumor	Tumor	Tumor
1738	1,2-dipalmitoylglycerol	Lipid	Diacylglycerol	11953	GC/MS	850	2600	145	40290-32-2	99931	90288		HMDB07098	36136	38259	33219			33993		40277	20765	51008	37381	14419	27113	67987	58299		34081	37895	18650	29159
818	1,5-anhydroglucitol (1,5-AG)	Carbohydrate	Glycolysis, Gluconeogenesis, and Pyruvate Metabolism	20675	GC/MS	100000580	1788.7	217.1	154-58-5	64960		C07326	HMDB02712	418435	738351	262885	516065	660287	1146694	752030	665583	570388	637668	612910	685688	233685	418942	545982	1064850	593253	596617	570325	861294
1700	1-(1-enyl-oleoyl)-GPE (P-18:1)*	Lipid	Lysoplasmalogen	44621	LC/MS Neg	100005372	6105.2	462.5						19515	56662	42417	28048	42589	48641	24577	40480	40208	33934	12589	32113	58501	40948	30805	14160	21952	34087	19800	40376
1698	1-(1-enyl-palmitoyl)-GPE (P-16:0)*	Lipid	Lysoplasmalogen	39270	LC/MS Neg	100003000	6153	436.4			10471193			56266	131092	106848	57318	120547	114533	69065	66238	124449	70693	61733	90228	114260	108244	104588	49004	91368	74460	86727	87337
1702	1-(1-enyl-stearoyl)-GPE (P-18:0)*	Lipid	Lysoplasmalogen	39271	LC/MS Neg	100003001	6500	464.4						58062	118066	83022	78296	150770	78049	61933	50872	76847	85787	56504	48640	93794	78411	89388	18700	32441	60781	97089	84320
1628	1-arachidonoyl-GPE (20:4)*	Lipid	Lysolipid	35186	LC/MS Neg	100001571	5731	500.3		42607465	21403171		HMDB11517	21137	50414	23329	50096	56251	31644	25910	36745	44456	41037	51094	38743	13708	27759	39004	42726	10214	33737	32610	32288
1649	1-arachidonoyl-GPI (20:4)*	Lipid	Lysolipid	34214	LC/MS Neg	100001654	5479	619.4					HMDB61690	44984	48538	36381	41090	59620	56722	43870	55634	24986	33435	81163	75688	90563	54144	57818	59473	35365	65835	58113	52264
1590	1-linoleoyl-GPC (18:2)	Lipid	Lysolipid	34419	LC/MS Pos	100001395	5574	520.4		11988421	10160888	C04100	HMDB10386	39055			21279	587692	34971				123637	173539	116285	21576	86481	53828		243790		231174
1624	1-linoleoyl-GPE (18:2)*	Lipid	Lysolipid	32635	LC/MS Neg	100001570	5725	476.3		52925130	21403170		HMDB11507	17336	38970	15643	35697	51817	15925	18257	14539	25290	42396	20844	10330	14175	17915	34318	12083	12425	30579	48208	9542
69	1-methylhistamine	Amino Acid	Histidine Metabolism	32441	GC/MS	100001204	1725	174.1	501-75-7	3614	3488	C05127	HMDB00898	61040	98389	37593	46589	99558	98245	33119	89939	55071	66433	120934	70659	43955	58266	52701	63959	70331	105770	42564	29618
73	1-methylimidazoleacetate	Amino Acid	Histidine Metabolism	32350	LC/MS Pos	100001208	845	141.1	2625-49-2	75810	68319	C05828	HMDB02820	18872	20333	19133	17990	30030	36131	19409	21516	13609	11059	19964	15911		16027	29122	11660	10092	21829		49600
1587	1-oleoyl-GPC (18:1)	Lipid	Lysolipid	33960	LC/MS Neg	100001272	6120	596	19420-56-5	16081932	17240641		HMDB02815	41936	105211	52947	47497	66475	49574	39446	61297	45414	37495	38698	17784	81729	47777	57732	25462	32042	67806	38462	22184
1620	1-oleoyl-GPE (18:1)	Lipid	Lysolipid	35628	LC/MS Neg	100001569	5928	478.3	89576-29-4	9547071	7826021		HMDB11506	63741	126906	114666	72716	127300	66179	58908	69896	142687	72655	43004	33906	123245	67570	87627	26667	53263	86510	61827	39633
1643	1-oleoyl-GPI (18:1)*	Lipid	Lysolipid	36602	LC/MS Neg	100001777	5577	597.4						13037	18546	10157	13730	11262	14102	10798	17033	10678	14320	14068	12435	30421	29216	27512	14724	18433	30460	23374	6945
1652	1-oleoyl-GPS (18:1)	Lipid	Lysolipid	19260	LC/MS Neg	100000630	5607	522.3		9547099	7826049			13330	18368	14956	14523	21966	19371	13389	14169	14286	15183	14621	11929	23751	29048	22859	25778	16579	26128	44929	14467
1581	1-palmitoleoyl-GPC (16:1)*	Lipid	Lysolipid	33230	LC/MS Pos	100001511	5524	494.3		24779461	21403152		HMDB10383	24741				23888					31780	55989	46829	26433	31351	21186		69694		43453	18663
1579	1-palmitoyl-GPC (16:0)	Lipid	Lysolipid	33955	LC/MS Neg	100001263	6046	570	17364-16-8	86554	78064		HMDB10382	218539	453520	323828	188077	296607	196454	169171	256551	194718	150483	194473	64595	285275	119422	263225	70156	113018	251547	104148	156065
1615	1-palmitoyl-GPE (16:0)	Lipid	Lysolipid	35631	LC/MS Neg	100001567	5940	452.3		9547069	7826019		HMDB11503	58420	107718	51577	40438	84304	68953	31120	38243	66511	58602	28436	15896	65645	32380	68734	8863	54096	39091	24805	44360
1662	1-palmitoyl-GPG (16:0)*	Lipid	Lysolipid	45970	LC/MS Neg	100005717	5549.7	483.4		3300276	2548639			11640	15298	16894	6036	8632	6191	8221	6352	6166	7928	9378	2308	15287	17645	9873	4028	6192	5796	11577	5265
1638	1-palmitoyl-GPI (16:0)*	Lipid	Lysolipid	35305	LC/MS Neg	100001655	5573	571.3					HMDB61695	19765	17937	16850	7831	20281	18117	13215	8149	6615	7929	13534	5452	31386	16710	22478	10590	27646	13083	34033	8701
1585	1-stearoyl-GPC (18:0)	Lipid	Lysolipid	33961	LC/MS Pos	100001271	5844	524.4	19420-57-6	497299	435389		HMDB10384	268354	19476		186619	1782988	195244	43870		18719	447546	1675654	872258	442156	1363030	964599	61305	1560888		1676561	67783
1618	1-stearoyl-GPE (18:0)	Lipid	Lysolipid	34416	LC/MS Pos	100001461	5842	482.3	69747-55-3	9547068	7826018		HMDB11130	57970			50547	420736	45675				124339	175055	176381	159656	367522	197132	16818	325091		313779	15884
1665	1-stearoyl-GPG (18:0)	Lipid	Lysolipid	34437	LC/MS Neg	100001462	5826	511.4			21403138				19831	19238	9970	9375		6970	6273	11727	14640	4447		6135	52558	12218	9515		11177	13659
1641	1-stearoyl-GPI (18:0)	Lipid	Lysolipid	19324	LC/MS Neg	100000656	5800	599.4	796963-93-4		21403067		HMDB61696	54642	96231	80707	69735	132468	61007	63650	82279	61911	56807	95157	52571	186314	267456	107108	146472	69552	149355	163486	46307
1651	1-stearoyl-GPS (18:0)*	Lipid	Lysolipid	45966	LC/MS Neg	100004327	5798.7	524.4		9547101	7826051			27283	58433	23640	45516	76711	43274	15111	26480	43210	53992	28722	37691	55857	111991	49395	35096	50823	33874	53242	28762
1047	10-heptadecenoate (17:1n7)	Lipid	Long Chain Fatty Acid	33971	LC/MS Neg	100001278	5558	267.3	29743-97-3	5312435	4471860		HMDB60038	87248	95900	55359	73788	87509	75141	76776	104652	86462	106264	85677	46355	119192	89586	95036	68502	97116	108683	74439	35211
1057	10-nonadecenoate (19:1n9)	Lipid	Long Chain Fatty Acid	33972	LC/MS Neg	100001277	5775	295.4	73033-09-7	5312513	4471938		HMDB13622	24738	40740	35643	36801	42217	26896	37907	49750	38412	37965	33796	26047	70332	62236	42898	35783	27542	51323	25642	15511
1317	13-HODE + 9-HODE	Lipid	Fatty Acid, Monohydroxy	37752	LC/MS Neg	100002196	5270	295.2		43013				107691	156493	36964	144377	301034	91393	29591	84491	76892	102290	128414	44592	37562	67142	196047	65108	32154	82380	37099	42500
1142	13-methylmyristate	Lipid	Fatty Acid, Branched	38293	GC/MS	100002344	1833	299.2	2485-71-4	151014	133106			31875	36584	21619	22746		24477	23736		19970	14685		35603	43474	27007		29490	16498		19354
1402	15-HETE	Lipid	Eicosanoid	37538	LC/MS Neg	100000565	5271	319.3	54845-95-3	5280724	4444307	C04742	HMDB02110	29313	39948	25119	67809	58879	28935	17370	8084	6878	34632	56450	59953	47355	27535	50858	55553	15164	40539	10744	47898
1145	15-methylpalmitate	Lipid	Fatty Acid, Branched	38768	LC/MS Neg	100002945	5698	269.4		17903417				105755	87101	74280	54825	53171	72260	67064	80289	61397	66750	72013	77983	140045	60007	60490	68987	90082	96844	70452	76239
84	2-aminoadipate	Amino Acid	Lysine Metabolism	6146	LC/MS Pos	381	794	162.1	542-32-5;1118-90-7	469	456	C00956	HMDB00510	31624	78416	47103	46549	56400	63824	32565	51204	130703	31685	35284	282904	46372	97967	75891	108079	74965	83835	38610	184586
326	2-aminobutyrate	Amino Acid	Methionine, Cysteine, SAM and Taurine Metabolism	1577	GC/MS	1128	1215.7	130	1492-24-6	439691	388757	C02261	HMDB00650	1408367	1682230	2471664	1400054	1690289	3019415	1517351	1425418	663518	1259121	2358059	1829576	4609336	2063136	1452992	2514831	2081830	2225364	1392437	1571841
327	2-hydroxybutyrate (AHB)	Amino Acid	Methionine, Cysteine, SAM and Taurine Metabolism	21044	GC/MS	100000933	1169.4	131	3347-90-8	440864	389701	C05984	HMDB00008	462537	843590	1053622	1291595	741742	1782485	913293	679625	340018	809365	827444	963736	1481975	1264246	632462	1833916	1115055	616331	553846	847002
1159	2-hydroxyglutarate	Lipid	Fatty Acid, Dicarboxylate	37253	GC/MS	100002070	1576	247	40951-21-1	43	42	C02630	HMDB00606	33779	40232	53805	52591	66540	55269	44631	37676	37119	35328	77936	120158	113920	77200	114153	97616	100848	67101	88326	217031
1292	2-hydroxypalmitate	Lipid	Fatty Acid, Monohydroxy	35675	LC/MS Neg	100001579	5508	271.3	764-67-0	92836	83805		HMDB31057	32153	54134	47312	67618	50545	80130	52458	39510	35424	44943	47184	67301	65017	97546	45148	49619	40678	43735	41752	68744
1293	2-hydroxystearate	Lipid	Fatty Acid, Monohydroxy	17945	LC/MS Neg	1239	5705	299.4	629-22-1	69417	62625	C03045		10724	16511	11159	15506	19189	25028	13289	9429	10959	9423	17344	19936	14356	12266	11111	10063	9791	13983	20215	23864
287	2-methylbutyrylcarnitine (C5)	Amino Acid	Leucine, Isoleucine and Valine Metabolism	35431	LC/MS Pos	100001509	2439	246.1	31023-25-3	6426901	4932320		HMDB00378	188445	161611	249492	254145	753466	1139181	389817	56562	200994	194788	63165	169683	851297	215952	603633	371887	304992	117247	317922	198458
1582	2-palmitoleoyl-GPC (16:1)*	Lipid	Lysolipid	35819	LC/MS Pos	100001561	5482	494.3			21403164			15967				60120					22907	83238	118074	122114	168833	51595	40022	501069	16565	130821
1580	2-palmitoyl-GPC (16:0)*	Lipid	Lysolipid	35253	LC/MS Neg	100001562	5945	570.3		15061532	21403165		HMDB61702	23614	38088	39033	19719	30263	30410	24475	24503	23436	13971	17836	13573	36522	12615	26270	13293	14504	23854	10868	22058
1715	2-palmitoylglycerol (16:0)	Lipid	Monoacylglycerol	33419	GC/MS	100001048	2108	129	23470-00-0	123409	110006		HMDB11533	67429		70437	51579	48228	94788	40773	58208	84570	70091		54290	98928	87912	79037	76493	92900	66881	65729	56049
834	2-phosphoglycerate	Carbohydrate	Glycolysis, Gluconeogenesis, and Pyruvate Metabolism	35629	GC/MS	100000093	1734	459.1	70195-25-4	59	13766841	C00631	HMDB03391			5287			11390		4756	2019	5709	17607	13303		2581		11833	6182		11799	2365
2906	2-piperidinone	Xenobiotics	Food Component/Plant	43400	LC/MS Pos	100004295	2034	100.1	675-20-7	12665	12144			37808	42959	1098219	509701	61080	198304	40794	71494	70746	172135	52897	28834	834893	105410	43229	175803	160797	42025	83649	58007
1586	2-stearoyl-GPC (18:0)*	Lipid	Lysolipid	35255	LC/MS Pos	100001555	5780	524.4		10208382	8383879						25337	56865					17438	50208		21243	51471	34649		52146		67832
129	3-(4-hydroxyphenyl)lactate	Amino Acid	Phenylalanine and Tyrosine Metabolism	32197	LC/MS Neg	240	1395	181.1	6482-98-0	9378	9010	C03672	HMDB00755			2961	2552	4120	3475	2684			3096	3625	4622	5020	4449	3546	5448	4312		6546	3439
181	3-(4-hydroxyphenyl)propionate	Amino Acid	Phenylalanine and Tyrosine Metabolism	39587	LC/MS Neg	100002914	1658	165.1	501-97-3	10394	9965	C01744	HMDB02199			36708						1262				54367						4336
2706	3-aminoisobutyrate	Nucleotide	Pyrimidine Metabolism, Thymine containing	1566	GC/MS	1114	1252.2	102	10569-72-9;214139-20-5	64956	58481	C05145	HMDB03911	62583	119777	71026	108193	68666	168988	156386	85933	55619	57096	103152	164823	111283	92525	68771	168348	94250	134809	66761	143206
1285	3-hydroxybutyrate (BHBA)	Lipid	Ketone Bodies	542	GC/MS	254	1203.5	116.9	625-72-9	441	428	C01089	HMDB00357	387457	2326507	3888172	7300598	310948	3266926	3614901	4102492	4279553	1271005	649502	3555208	3774985	6002945	460284	3762064	1227361	4534977	6319109	3231326
1257	3-hydroxybutyrylcarnitine (1)	Lipid	Fatty Acid Metabolism(Acyl Carnitine)	43264	LC/MS Pos	100003926	1475	248.2		53481617			HMDB13127	87666	238154	432264	529792	84031	378602	197574	304493	335642	85346	165376	553072	886031	542592	118044	509716	239540	521774	1013906	248032
286	3-methyl-2-oxovalerate	Amino Acid	Leucine, Isoleucine and Valine Metabolism	15676	LC/MS Neg	100000036	2106	129.2	1460-34-0;51829-07-3	47	46	C00671	HMDB03736		1620		3634	1656	3967				3078			2427	1927	1935			1774	1630
183	3-phenylpropionate (hydrocinnamate)	Amino Acid	Phenylalanine and Tyrosine Metabolism	15749	LC/MS Neg	100000010	2830	149.1	501-52-0	107	10181339	C05629	HMDB00764			55617	2376					2500				30182						5140
835	3-phosphoglycerate	Carbohydrate	Glycolysis, Gluconeogenesis, and Pyruvate Metabolism	40264	GC/MS	132	1754	357.1	80731-10-8	724	10669764	C00597	HMDB00807	90412	13842	76495	251218	81660	262101	130227	119288	109970	199134	471299	394547	23671	152910	70937	230951	138874	46890	268508	190863
393	4-acetamidobutanoate	Amino Acid	Polyamine Metabolism	1558	LC/MS Pos	1113	1724	146.1	3025-96-5	18189	17180	C02946	HMDB03681	28803	51236	59167	26581	46798	57561	51041	62426	32602	37966	75152	48464	80433	28531	35853	39567	37134	29065	72248	40447
1910	4-androsten-3beta,17beta-diol disulfate (1)*	Lipid	Steroid	37202	LC/MS Neg	100001992	3735	224.3		10634		C04295	HMDB03818		10203	8022	23728		2816	17134	5015	3225			7854	3625	14094		2225		5393	4471	15287
398	4-guanidinobutanoate	Amino Acid	Guanidino and Acetamido Metabolism	15681	LC/MS Pos	100000096	1085	146.1	463-003;463-00-3	500	486	C01035	HMDB03464		21924	39496	11558	24276	35998	21159	16097			30816	22459		33835	24408	26918	18903		26920	31048
412	4-hydroxy-nonenal-glutathione	Amino Acid	Glutathione Metabolism	48504	LC/MS Pos	100006240	3844	464.206	99927-70-5					18387	54439	17457		65938	31094		16966	26115	18187	54858	36686	18581		31219	21191		34192	24654	31236
1287	4-hydroxybutyrate (GHB)	Lipid	Fatty Acid, Monohydroxy	34585	GC/MS	100001507	1277	233.1	502-85-2	10413	9984	C00989	HMDB00710	37534	8150	33964	22764	13754	26683	21832	17891	10481	39587	81229	27395	61448	19670	27957	28850	88643	31907	32944	19321
114	4-hydroxyphenylacetate	Amino Acid	Phenylalanine and Tyrosine Metabolism	541	GC/MS	144	1630.6	179	156-38-7	127	3881560	C00642	HMDB00020	15046		24381	18719	8534	14546	12437	8734	28920	41631		15389	29362	15223		11858	31717		44354
257	4-methyl-2-oxopentanoate	Amino Acid	Leucine, Isoleucine and Valine Metabolism	22116	LC/MS Neg	100000551	2200	129.2	816-66-0	70	69	C00233	HMDB00695		2706		5851	1993	8005		1988		5718		4889	3363	2486	2778	4060	3659	3869	1459
2670	5,6-dihydrouracil	Nucleotide	Pyrimidine Metabolism, Uracil containing	1559	GC/MS	1125	1505.2	243	504-07-4	649	629	C00429	HMDB00076	71861	245221	149030	110498	151930	167108	132450	104163	80112	174170	110644	249898	160676	238265	126202	356776	105651	114077	100588	127447
98	5-aminovalerate	Amino Acid	Lysine Metabolism	18319	LC/MS Pos	100000454	860	118.1	660-88-8	138	135	C00431	HMDB03355	619343	792573	2369705	224109	408178	1091788	84694	114856	336251	632233	299893	303788	4538881	647400	167681	227203	2099955	114095	408160	25376
233	5-hydroxyindoleacetate	Amino Acid	Tryptophan Metabolism	437	LC/MS Pos	71	2549	192.1	54-16-0	1826	1760	C05635	HMDB00763	67395	67126	44407	58038	87649	50992		32333	65932	74917	42637				25534			21524		25751
232	5-hydroxytryptophol	Amino Acid	Tryptophan Metabolism	41498	LC/MS Pos	100002534	2480.5	178.1	154-02-9	9061	8708		HMDB01855	363400	500838	196987	171188	629178	743514	377262	425685	542836	286585	50187		21739		157283	27454		108213		42387
389	5-methylthioadenosine (MTA)	Amino Acid	Polyamine Metabolism	1419	LC/MS Pos	212	2427	298.1	2457-80-9	439176	388321	C00170	HMDB01173	58931	58014	30696	50485	48970	78092	43720	39750	38301	37132	172438	110308	156643	57782	63560	197972	141180	126889	227903	42104
408	5-oxoproline	Amino Acid	Glutathione Metabolism	1494	LC/MS Neg	1021	744	128.2	98-79-3	7405	7127	C01879	HMDB00267	11977	17656	12027	10347	15250	18938	7777	11309	12636	11150	15882	23185	23710	15072	13732	18381	12798	14097	15135	18869
844	6-phosphogluconate	Carbohydrate	Pentose Phosphate Pathway	15442	LC/MS Neg	100000341	588	275.1	921-62-0;53411-70-4	91493	82615	C00345	HMDB01316	13895	15547	10346	14942	10662	13949	9696	11214	15258	9144	34405	13911	17691	7825	17223	12510	8998	21615	21499	22400
1813	7-alpha-hydroxy-3-oxo-4-cholestenoate (7-Hoca)	Lipid	Sterol	36776	LC/MS Neg	100001609	5268	429.4	115538-85-7	3081085	2338765	C17337	HMDB12458	3622	5549	4970	4108	6632	11669	4037	5596	4708	7956	3257	4238	2900	5331	3349	8976	9013	2935		4120
2017	7-ketodeoxycholate	Lipid	Secondary Bile Acid Metabolism	31904	LC/MS Neg	100001063	4840	405.4	911-40-0	188292	163659		HMDB00391					9676					3005					3147		4009		3463
790	Ac-Ser-Asp-Lys-Pro-OH	Peptide	Polypeptide	40707	LC/MS Pos	100003761	1767	488.2	127103-11-1	4409396	3610210			14821	24968	17118		24648	31177	15965	20505	16773	14928	17607	16897	72138		21983	31626	21590	25359	38966
1256	acetylcarnitine	Lipid	Fatty Acid Metabolism(Acyl Carnitine)	32198	LC/MS Pos	100000802	1203	204.2	5080-50-2	1	5406074	C02571	HMDB00201	1992818	3240704	3014923	3595823	2272960	2939082	2767494	2500816	3482215	2015057	3155319	5567221	3788671	3608475	2878065	4371186	4950890	3521570	4545296	4710148
1286	acetylcholine	Lipid	Neurotransmitter	18790	LC/MS Pos	1749	866	146.1	60-32-1					59022	83430	73306	69531	108387	49600	81474	87108	63227	67798	78840	80576	29303	21790	30747	38232	11409	41980	12168	214544
2595	adenine	Nucleotide	Purine Metabolism, Adenine containing	554	LC/MS Pos	880	1003	136.1	73-24-5	190	185	C00147	HMDB00034	43142	40518		66250	50142	42497	35352	24328	28427		104800	156815	198264		61018	64474	55419	178119	196438	111110
2594	adenosine	Nucleotide	Purine Metabolism, Adenine containing	555	LC/MS Pos	798	1650	268.1	58-61-7	60961	54923	C00212	HMDB00050	893884	2359931	846899	935792	1186069	1048397	792295	1515488	1657522	717945	589178	405263	1072984	149276	1557603	280961	898943	1699148	905149	608641
2589	adenosine 2'-monophosphate (2'-AMP)	Nucleotide	Purine Metabolism, Adenine containing	36815	LC/MS Pos	100001694	1625	348.1	130-49-4	94136		C00946	HMDB11617	40523	71048	20713	24413	77928	21561	34314	21417	16911	18655	87653		103039		46164	32953	47618	37527	34597	42554
2588	adenosine 3'-monophosphate (3'-AMP)	Nucleotide	Purine Metabolism, Adenine containing	35142	LC/MS Pos	100001449	1451	348.1	84-21-9	41211	10463793	C01367	HMDB03540	425223	708485	195863	399004	572565	353361	337488	191392	40838	241287	487627	69263	299334	98948	197203	110903	276761	344265	37728	83806
2586	adenosine 5'-diphosphate (ADP)	Nucleotide	Purine Metabolism, Adenine containing	3108	LC/MS Neg	208	700	426.1	20398-34-9	6022	5800	C00008	HMDB01341	10048		6214	9613	14920	17953	7240	8281	19163	6797	40134	18980	22644	10051	25117	16262	44082	18511	20875	18397
2733	adenosine 5'-diphosphoribose (ADP-ribose)	Cofactors and Vitamins	Nicotinate and Nicotinamide Metabolism	558	LC/MS Neg	215	964	558.1	68414-18-6	192	3674071	C00301	HMDB01178	37103		16366	31513	42844	26153	35771	18683	25213	42116	80068	18003	8160	11547	43989	13047	22748	16580	38892	20920
2587	adenosine 5'-monophosphate (AMP)	Nucleotide	Purine Metabolism, Adenine containing	32342	LC/MS Pos	209	1210	348.1	149022-20-8	6083	10239183	C00020	HMDB00045	2203751	2374928	365318	2269147	2056874	1389337	1430546	731426	1243879	1338135	6113957	142546	3816272	153901	2306155	112256	3809035	3660651	4224846	382865
2591	adenosine-2',3'-cyclic monophosphate	Nucleotide	Purine Metabolism, Adenine containing	37467	LC/MS Pos	72	1484	330.2	37063-35-7	2024	1947	C02353	HMDB11616		54164	32033					19774										84802		169659
2593	adenylosuccinate	Nucleotide	Purine Metabolism, Adenine containing	18360	LC/MS Neg	1303	569	462.1	19046-78-7	195	190	C03794	HMDB00536	6603	3479			4056	3424					21841		19846		5656		10982	12338	11685
1089	adrenate (22:4n6)	Lipid	Polyunsaturated Fatty Acid (n3 and n6)	32980	LC/MS Neg	100001193	5684	331.3	2091-25-0	5497181	4445971	C16527	HMDB02226	299706	404615	339580	379678	389708	363361	358050	390127	342425	488141	369956	435257	394398	727907	480315	546481	358542	349847	397405	382818
25	alanine	Amino Acid	Alanine and Aspartate Metabolism	1126	GC/MS	811	1147.6	115.9	56-41-7	5950	5735	C00041	HMDB00161	40909320	41276816	48942300	36012544	48786404	46019596	33354604	39226304	26432006	42000052	66388544	61512136	87235040	42834480	42065612	49243176	68047256	55168184	65847460	24416424
446	alanylleucine	Peptide	Dipeptide	37093	LC/MS Pos	100001890	2150	203	1638-60-4	259583	227831		HMDB28691	26762	561600	133156	22164		25369	42780	83679	44475	47976	46621	24575	50608	48217		21752	50644	279935		64721
284	allo-isoleucine	Amino Acid	Leucine, Isoleucine and Valine Metabolism	46552	GC/MS	100005840	1325	158.1		6950182;99288	89698			31936	62655	64306	59761	58373	116228	69856	65678	28082	48870	56562	55825	105640	82301	36056	76342	75312	89905	54776	80763
273	alpha-hydroxyisovalerate	Amino Acid	Leucine, Isoleucine and Valine Metabolism	33937	GC/MS	100001300	1208	145.1	600-37-3	99823	90190		HMDB00407	64997	76321	126890	125306	68016	186842	319173	139203	39993	168980	108688	65522	235261	102785	97505	206122	279208	112200	79516	258667
2752	alpha-tocopherol	Cofactors and Vitamins	Tocopherol Metabolism	1561	GC/MS	1105	2305.4	502.5	59-02-9;10191-41-0	14985	14265	C02477	HMDB01893	82073	118005	157764	333876	133469	101628	143455	384927	346692	539761	150628	117781	174819	1484118	151702	177919	571558	236131	144980	294195
863	arabinose	Carbohydrate	Pentose Metabolism	575	GC/MS	828	1631.6	217	28697-53-2	66308	59687	C00216	HMDB00646	37838	24991	45457	44694	17635	47260	45172	60833	24734	53170	95753	33295	47519	28652	37393	25937	38599	61374	85155	41111
868	arabitol	Carbohydrate	Pentose Metabolism	38075	GC/MS	100000012	1687.5	307.1	7643-75-6	94154	84971	C01904	HMDB00568	13111	22501	30974	19637	12942	18999	15344	13448	5444	13753	21903	24598	23944	16418	21870	13776	14187	13237	16235	20340
2749	arabonate	Cofactors and Vitamins	Ascorbate and Aldarate Metabolism	37516	GC/MS	100001937	1736	292.1	7643-75-7	122045	108861	C00878	HMDB00539	10131	33253	14026	25274	27301	28586	17617	23094	6207	17946	62584	29070	6727	9775	28330	13929	12332	8492	28717	27428
1059	arachidate (20:0)	Lipid	Long Chain Fatty Acid	44679	LC/MS Neg	893	6282	311.3	506-30-9	10467	10035	C06425	HMDB02212	110754	103887	103807	82065	104150	121773	119770	96735	100158	81986	103542	81978	123777	201188	106707	86433	80982	109948	114275	89219
1088	arachidonate (20:4n6)	Lipid	Polyunsaturated Fatty Acid (n3 and n6)	1110	LC/MS Neg	229	5525	303.4	506-32-1	444899	392692	C00219	HMDB01043	1359349	2498479	1935596	1398583	2366332	1579579	1537705	1526291	1485902	1973170	1556820	1785816	1975647	2635738	1744595	1436737	1211995	1538457	2296013	1980381
346	arginine	Amino Acid	Urea cycle; Arginine and Proline Metabolism	1638	LC/MS Pos	231	650	175.2	1119-34-2	232	227	C00062	HMDB00517	978073	1158892	1144914	1128658	1195883	1460626	1191122	1196545	983304	1219833	744146	1267374	922026	1177400	875405	1299044	969595	1021692	958098	1037835
2746	ascorbate (Vitamin C)	Cofactors and Vitamins	Ascorbate and Aldarate Metabolism	1640	GC/MS	233	1850.1	332.1	134-03-2		10189562	C00072	HMDB00044	390646	9164053	3490459	724773	3272663	1832174	88945	3160891	1277070	2489033	5237237	2758433	3421595	2243731	6233613	2400735	7127421	4437742	3216389	3598537
30	asparagine	Amino Acid	Alanine and Aspartate Metabolism	11398	GC/MS	917	1651.2	231	70-47-3	6267	6031	C00152	HMDB00168	310354	551986	421514	290828	447956	584015	200417	285688	236029	299610	611256	1217828	416389	726440	554826	970191	777338	608336	827996	511281
28	aspartate	Amino Acid	Alanine and Aspartate Metabolism	15996	GC/MS	234	1529.7	232	56-84-8	5960	5745	C00049	HMDB00191	5168037	5644026	6877704	4414462	5443975	9276539	3868939	7250377	4134449	5794530	8358874	7962769	10803263	6042759	5462181	5725889	9162214	17270350	7266250	6031827
2677	beta-alanine	Nucleotide	Pyrimidine Metabolism, Uracil containing	55	GC/MS	244	1451.8	174	56-41-7;107-95-9	239	234	C00099	HMDB00056	31925	49709	63115	36871	72057	23541	19190	32155	22515	46201	72190	90605	200414	178340	95226	87220	134526	129000	183080	40739
266	beta-hydroxyisovaleroylcarnitine	Amino Acid	Leucine, Isoleucine and Valine Metabolism	35433	LC/MS Pos	100001594	1683	262.1	99159-87-2		21403176			67761	26351	93070	56535	99137	116310	77415	30421		76111	45180	67671	129037	62892	122954	81411	300057	65835		78414
1824	beta-sitosterol	Lipid	Sterol	27414	GC/MS	100001033	2380.8	357.4	83-46-5	222284	192962	C01753	HMDB00852			27070		44930				16064	11721	17513	23489	19141		55875	15543	20540	22484	12436	20483
2754	beta-tocopherol	Cofactors and Vitamins	Tocopherol Metabolism	42316	GC/MS	100001641	2260	222.1	148-03-8	6857447	5256784	C14152	HMDB06335				34456			24664	27809	25724	33048	25235			51658		27427	44259			36669
6	betaine	Amino Acid	Glycine, Serine and Threonine Metabolism	3141	LC/MS Pos	799	721	118.2	107-43-7	247	24219951173	C00719	HMDB00043	938700	885817	1022457	1462532	841624	1208026	856484	754901	374061	565006	1454037	674370	824216	1400285	974126	949275	1099946	1599272	1144357	639562
2788	bilirubin (Z,Z)	Cofactors and Vitamins	Hemoglobin and Porphyrin Metabolism	27716	LC/MS Neg	1090	4812	583.2	635-65-4	5280352	4444055	C00486	HMDB00054		3250	4819	7462		8308		3753		4962		2681		4690		6893		2774
1239	butyrylcarnitine	Lipid	Fatty Acid Metabolism (also BCAA Metabolism)	32412	LC/MS Pos	100001054	2007	232.2	25576-40-3	439829	184820	C02862	HMDB02013	424375	1130764	2595133	2477797	458810	853083	1334822	309006	1233537	647929	801203	1614122	3978878	1708637	1181032	1757565	1932018	1140296	4069948	1035328
249	C-glycosyltryptophan	Amino Acid	Tryptophan Metabolism	48782	LC/MS Pos	100006379	1920	367.15	180509-18-6	10981970	9157171			95303	163056	133066	145017	144028	150516	95754	146713	110377	88963	149539	475441	170862	286335	229926	287372	217258	198163	154907	298750
96	cadaverine	Amino Acid	Lysine Metabolism	15308	GC/MS	100000110	1780.4	174	462-94-2;1476-39-7	273	13866593	C01672	HMDB02322		270750	1217812		59145	98278	21296		19232	32407	30499		1830371	119924		53248	51599	20555	17866
1826	campesterol	Lipid	Sterol	39511	GC/MS	100001269	2353	343.4	474-62-4	173183	151215	C01789	HMDB02869	15096			72236	29711		36029	31867		26081		11277
1030	caproate (6:0)	Lipid	Medium Chain Fatty Acid	32489	LC/MS Neg	926	2766	115.2	142-62-1	8892	8552	C01585	HMDB00535	4128	12003	7289	7009	8366	4518	3984	6751	5023	8855	6440	7263	5224	5356	7564	8014	4865	7259	6028	7535
1032	caprylate (8:0)	Lipid	Medium Chain Fatty Acid	32492	LC/MS Neg	932	4367	143.2	124-07-2	379	370	C06423	HMDB00482	4149	9352	5992	6087	5380	4505	3896	4990	5993	5839	4336	3920	3935	5832	4539	13120	3463	6226	4231	6217
1280	carnitine	Lipid	Carnitine Metabolism	15500	LC/MS Pos	100000007	702	162.2	461-05-2	10917	10455	C00318	HMDB00062	1758239	1818173	1301053	1578841	2138638	1995740	1264886	1451460	1388642	1273259	2230221	2179058	3214852	1569657	1774402	2458130	2888301	2321271	1869139	1579877
1971	chenodeoxycholate	Lipid	Primary Bile Acid Metabolism	37789	LC/MS Neg	1123	5250	391.4	474-24-9;474-25-9	10133		C02528	HMDB00518			4314	2920		2539				38933			4206	1391			33757
1428	chiro-inositol	Lipid	Inositol Metabolism	37112	GC/MS	100001859	1857	318.1	643-12-9		10254647	C19891	HMDB34220		16876	14934	17988		17158	17756	3533	23098		20982	7806	27660	7880	18077	9682	11682	6855	14870	19150
1968	cholate	Lipid	Primary Bile Acid Metabolism	22842	LC/MS Neg	136	5148	407.4	81-25-4	221493		C00695	HMDB00619			3749		10106				8270	28841			3027	3835	4918		61507		23660
1816	cholestanol	Lipid	Sterol	21131	GC/MS	100000859	2320.8	215.2	80-97-7	6665	6413	C12978	HMDB00908	45671	86952	60437	40900	91220	64023	35618	36663	49281	51732	121787	31441	36747	37609	54586	19115	43981	42676	78273	39584
1803	cholesterol	Lipid	Sterol	63	GC/MS	266	2316.9	329.3	57-88-5	11025495	4937803	C00187	HMDB00067	10750475	16361981	11955899	11885737	15167691	14399164	9921900	10774435	9876111	10683897	17887770	11515331	14189890	16142862	14045608	13880718	15594835	15259036	14533699	10189410
1454	choline	Lipid	Phospholipid Metabolism	15506	LC/MS Pos	1256	674	104.2	67-48-1	305	149278	C00114	HMDB00097	3565388	3100518	3080564	2784075	3184662	3344517	3022496	2737275	2505651	3375116	3662977	3652569	3002579	2797073	3203750	6567248	2680088	3133023	3341396	2952676
1455	choline phosphate	Lipid	Phospholipid Metabolism	34396	LC/MS Pos	267	695	184.1	72556-74-2	1014	119298	C00588	HMDB01565	5740774	7374402	4993683	3752026	8381198	5274863	5641241	4853452	2976387	4960549	10403066	3757628	8051819	3877408	7130148	3046094	6050221	4837252	6608850	3542670
1005	citrate	Energy	TCA Cycle	1564	GC/MS	1124	1763.4	273.1	77-92-9	311	305	C00158	HMDB00094	582527	2027429	1785144	2292526	1236203	2021046	1801579	1752576	1357702	903300	451977	1316728	1124457	1469985	940158	1195797	598711	1653863	1548869	1041413
351	citrulline	Amino Acid	Urea cycle; Arginine and Proline Metabolism	2132	LC/MS Pos	391	715	176.1	372-75-8	9750	810	C00327	HMDB00904	99659	157369	163292	212223	153357	175684	213592	106624	125007	151004	73026	408631	246588	321226	116526	294866	170645	135532	136578	223639
2742	coenzyme A	Cofactors and Vitamins	Pantothenate and CoA Metabolism	2936	LC/MS Neg	270	1600	766.1	85-61-0;18439-24-2	317	311	C00010	HMDB01423		4133	5325					2906	2051	2771	14769		13014		11341	1664	15209	13079	12977	4285
1817	coprostanol	Lipid	Sterol	45986	GC/MS	100005346	2289	215.2	360-68-9		19951861			36672	97936	22214	36927	70879	25038	90805	39232		10601	27566		11273	14676	18567		11132			8244
1889	cortisone	Lipid	Steroid	1769	LC/MS Pos	273	4420	361.2	53-06-5	222786	361685	C00762	HMDB02802	35944	29123	42631	60278	29538	22265	54844	31143	19133	44137	44776		23734	18951	18989		24667	47729	18913	35884
375	creatine	Amino Acid	Creatine Metabolism	27718	LC/MS Pos	1221	758	132.1	57-00-1	586	566	C00300	HMDB00064	6896484	9223024	5285894	5668833	7675909	7748419	5206141	5558194	10755089	5886865	6919255	10797923	14818020	3932735	11077896	11535643	21263408	8213597	17993352	14989251
376	creatinine	Amino Acid	Creatine Metabolism	513	LC/MS Pos	275	730	114.1	60-27-5	588	568	C00791	HMDB00562	354739	741607	859248	635740	510706	569642	770889	385813	490999	373043	436150	685638	943712	670157	464432	618251	715778	432935	544314	1005100
328	cysteine	Amino Acid	Methionine, Cysteine, SAM and Taurine Metabolism	31453	GC/MS	800	1560.1	218	52-90-4;56-89-3	5862	5653	C00097	HMDB00574	309571	409028	598008	466567	421319	511751	186359	355697	186247	403108	569606	614824	1071935	759624	431280	543169	1845660	772455	542074	526651
403	cysteine-glutathione disulfide	Amino Acid	Glutathione Metabolism	35159	LC/MS Pos	100001437	821	427.1	13081-14-6	4247235	3455404		HMDB00656	92408	30161	56178	134298	104427	111007	72867	42133	21962	109079	38642	49292	99661	240256	14145	32029	120134	28186	17649	11721
330	cystine	Amino Acid	Methionine, Cysteine, SAM and Taurine Metabolism	31454	GC/MS	279	2015.3	218	56-89-3	67678	575	C00491	HMDB00192	25775	63236	30010	36457	18081	52368	25692	27432		29102	34592	24824	33145	40452	21984	21279	20870		32562
2686	cytidine	Nucleotide	Pyrimidine Metabolism, Cytidine containing	514	LC/MS Pos	827	1065	244	65-46-3	6175	5940	C00475	HMDB00089	17454	110529	22233	19043	56582	29534	51760	129415	64816	18923	11122	33938			13997			16528		165625
2684	cytidine 3'-monophosphate (3'-CMP)	Nucleotide	Pyrimidine Metabolism, Cytidine containing	2959	LC/MS Pos	105	1181	323.9	84-52-6	66535	225079	C05822		64965	113639	59853	116276	55573	56638	65334	76005	38655	71126	37895	35152	32885	64051	49026	43112	24708	40985	39664	36296
1456	cytidine 5'-diphosphocholine	Lipid	Phospholipid Metabolism	34418	LC/MS Pos	1220	777	489.1	33818-15-4	13804	21531769	C00307	HMDB01413	381314	117400	249533	125010	139070	271978	141992	92765	94466	145130	619358	267522	393573	170758	232582	235424	307315	328348	564409	143617
2683	cytidine 5'-monophosphate (5'-CMP)	Nucleotide	Pyrimidine Metabolism, Cytidine containing	2372	LC/MS Pos	282	887	324	63-37-6	6131	5414497	C00055	HMDB00095	115313	182479	52110	130463	100362	122888	74792	125314	124703	76050	160281	66374	143772	82891	141111	99494	106770	187161	166132	51095
1263	decanoylcarnitine	Lipid	Fatty Acid Metabolism(Acyl Carnitine)	33941	LC/MS Pos	100001251	4700	316.3	1492-27-9	10245190	8420677		HMDB00651			16109									77063	27006	141443		75070	37285	28590	34822	44977
2747	dehydroascorbate	Cofactors and Vitamins	Ascorbate and Aldarate Metabolism	1659	GC/MS	301	1800	245.1	490-83-5	835	812	C05422	HMDB01264	103229	131147	59110	24180	132170	62471	12000	48893	51109	95686	106402	27381	24962	37697	30996	18656	25594	63251	37772	3650
1894	dehydroisoandrosterone sulfate (DHEA-S)	Lipid	Steroid	32425	LC/MS Neg	100000792	4771	367.2	651-48-9	12594	12074	C04555	HMDB01032		14473	5919	18714		4622	15843	19946	7726	3425		12400	2607	9721		3566		20582	8573	13678
2756	delta-tocopherol	Cofactors and Vitamins	Tocopherol Metabolism	33418	GC/MS	100001216	2232	474.4	119-13-1	92094	83144	C14151	HMDB02902		9460		8984	3665		8712		12749	37894				30697		3060	9471			7303
1279	deoxycarnitine	Lipid	Carnitine Metabolism	36747	LC/MS Pos	100001662	759	146.1	6249-56-5	134	705	C01181	HMDB01161	122318	87504	334641	107896	97575	159084	98139	52596	113761	56704	183645	125809	573717	177161	101490	132949	141584	103672	347931	89111
1985	deoxycholate	Lipid	Secondary Bile Acid Metabolism	1114	LC/MS Neg	302	5268	391.4	83-44-3	222528	389318	C04483	HMDB00626			33806	50626	357010		27555			321882			23738	23350	28790		152667			1875
1092	dihomo-linoleate (20:2n6)	Lipid	Polyunsaturated Fatty Acid (n3 and n6)	17805	LC/MS Neg	1231	5722	307.3	2091-39-6	6439848	4944228	C16525	HMDB05060	202134	279648	275727	300340	420486	212480	270818	360529	340243	360943	268084	199809	291603	601419	386226	304602	212716	311397	212898	135752
1087	dihomo-linolenate (20:3n3 or n6)	Lipid	Polyunsaturated Fatty Acid (n3 and n6)	35718	LC/MS Neg	100001739	5600	305.4	17046-59-2	5280581	4471954	C03242	HMDB02925	306226	351243	359641	305013	470604	305840	235422	267687	329596	602738	339703	252592	452721	1100465	488604	342757	602583	270046	294400	253542
830	dihydroxyacetone phosphate (DHAP)	Carbohydrate	Glycolysis, Gluconeogenesis, and Pyruvate Metabolism	15522	GC/MS	309	1737	315.1	102783-56-2	668	3833110	C00111	HMDB01473	175409	346017	84045			158297	93526	137052	181861		171666	155219		48099	379765	85868		181848	245068	113831
1091	docosadienoate (22:2n6)	Lipid	Polyunsaturated Fatty Acid (n3 and n6)	32415	LC/MS Neg	100001182	6017	335.4	7370-49-2	5282807	4445934	C16533	HMDB61714	12690	16390	16243	10239	19059	17880	13181	9513	13733	12633	15370	20228	32383	40057	14875	27625	15575	18838	12932	13077
1079	docosahexaenoate (DHA; 22:6n3)	Lipid	Polyunsaturated Fatty Acid (n3 and n6)	19323	LC/MS Neg	100000665	5518	327.3	6217-54-5	445580	393183	C06429	HMDB02183	173019	296437	169115	177429	224812	194928	145572	207719	174775	279318	200723	197431	163041	302655	204153	233080	190099	251503	206023	163326
1078	docosapentaenoate (n3 DPA; 22:5n3)	Lipid	Polyunsaturated Fatty Acid (n3 and n6)	32504	LC/MS Neg	100001181	5574	329.4	2234-74-4	6441454		C16513	HMDB01976	149161	198443	151809	141705	227258	115203	116313	224441	177610	329173	154793	129625	145882	336541	202221	157224	201915	207352	130160	87617
1090	docosapentaenoate (n6 DPA; 22:5n6)	Lipid	Polyunsaturated Fatty Acid (n3 and n6)	37478	LC/MS Neg	100001580	5625	329.4	25182-74-5	6441454	4945614	C16513	HMDB01976	33424	54999	42110	29557	56048	41882	33073	21067	37073	53766	45068	47123	42249	75392	47918	43959	39902	18852	60452	34062
1080	docosatrienoate (22:3n3)	Lipid	Polyunsaturated Fatty Acid (n3 and n6)	32417	LC/MS Neg	100001195	5825	333.4	59708-86-0	5312556	4471981	C16534	HMDB02823	14487	23984	30934	25828	32125	23808	21940	22392	25913	29309	20092	25018	42310	60422	32804	38314	24712	31443	25353	14239
1077	eicosapentaenoate (EPA; 20:5n3)	Lipid	Polyunsaturated Fatty Acid (n3 and n6)	18467	LC/MS Neg	2050	5442	301.3	10-2005-9;10417-94-4	446284	393682	C06428	HMDB01999	187600	249748	131868	118886	210423	113856	114330	190002	121585	251647	179487	88385	189550	196838	172376	97642	135075	192951	207918	89755
1062	eicosenoate (20:1)	Lipid	Long Chain Fatty Acid	33587	LC/MS Neg	100001335	5955	309.4		5282768	4445895		HMDB02231	225895	264555	246399	262804	315940	203553	246087	422144	335777	181088	280633	158605	341942	701021	252748	241533	154293	386056	131235	122765
3087	ergothioneine	Xenobiotics	Food Component/Plant	37459	LC/MS Pos	100002154	847	230.2	58511-63-0	3032311	2297320	C05570	HMDB03045	58640	73322	143761	197178	71083	115492	66100	410715	389399	169720	106939	172366	277193	439232	134292	300166	371798	1197536	647448	124134
1066	erucate (22:1n9)	Lipid	Long Chain Fatty Acid	1552	LC/MS Neg	1087	6273.3	337.4	112-86-7	5281116	7924	C08316	HMDB02068	56956	47304	33203	25699	34363	37370	28733	48924	52268	21866	50857	48364	78512	178164	31878	54301	41018	72773	31899	31171
3089	erythritol	Xenobiotics	Food Component/Plant	20699	GC/MS	100000846	1517.5	217	149-32-6	222285	13835932	C00503	HMDB02994	43699	37473	121468	74479	62261	64530	57495	34792	41522	39188	103219	70894	142346	58306	71432	63394	68148	59151	84389	80315
998	erythronate*	Carbohydrate	Aminosugar Metabolism	33477	GC/MS	100001320	1546.9	292.1	88759-55-1	2781043	2061231		HMDB00613	45860	41286	85587	44899	51898	51089	57029	64963	15091	41494	125660	67356	144302	96312	73882	70741	128524	76422	78798	39435
1460	ethanolamine	Lipid	Phospholipid Metabolism	1497	GC/MS	420	1304	174.1	141-43-5	700	13835336	C00189	HMDB00149	1304253	2044695	1106363	907373	1434576	916249	905185	714458	696207	1559970	1940755	1020698	1412118	1250653	1206189	1763568	1477128	1679504	2003003	636594
2736	flavin adenine dinucleotide (FAD)	Cofactors and Vitamins	Riboflavin Metabolism	2134	LC/MS Neg	327	2413	784.1	146-14-5;84366-81-4	643975	559059	C00016	HMDB01248	11570	13793	9385	11955	12928	11886	7404	9451	7437	11408	21687	8046	11705	7029	11275	6313	12122	13202	12746	6095
925	fructose	Carbohydrate	Fructose, Mannose and Galactose Metabolism	577	GC/MS	878	1758	217	57-48-7	5984	5764	C00095	HMDB00660	46462	101679	86432	65295	64508	45546	40772	93980	64902	48998	222093	40677	104051	60303	91037	91965	66506	56629	64223	93090
825	fructose-6-phosphate	Carbohydrate	Glycolysis, Gluconeogenesis, and Pyruvate Metabolism	12021	GC/MS	1232	1994.9	315.1	103213-47-4	69507	19969987	C05345	HMDB00124	398157	925501	495542	268593	144551	455084	315154	296450	278032	85143	650734	452390	1234283	291473	326046	242294	38550	394860	1431669	220943
1014	fumarate	Energy	TCA Cycle	1643	GC/MS	330	1382.1	245	100-17-8	444972	10197150	C00122	HMDB00134	654874	1131921	1255678	526743	911794	1100122	635721	802791	809220	545372	938891	807961	1993807	446526	1162229	640533	988221	960320	860230	801211
940	galactose	Carbohydrate	Fructose, Mannose and Galactose Metabolism	12055	GC/MS	287	1793.8	203.9	59-23-4	3037556	2301265	C01582	HMDB00143		543663	65181	11132	23085	17489	25936	50542	20766	61925	25884	14898	35561	24612			69799	76961	50161	34759
44	gamma-aminobutyrate (GABA)	Amino Acid	Glutamate Metabolism	1416	GC/MS	141	1539.7	304.1	56-12-2	119	116	C00334	HMDB00112	107106	147920	157853	26327	104771	114876	53930	123869	59716	95930	125708	90750	188582	66139	111502	124981	171481	158618	340059	41888
418	gamma-glutamylglutamate	Peptide	Gamma-glutamyl Amino Acid	36738	LC/MS Pos	331	1036	277.1	1116-22-9	92865	83831	C05282	HMDB11737	47935	61409	63465	39559	48327	96964	23936	59029	71126	67911	58956	113043	128961	97693	59826	90757	102524	65299	78567	74512
419	gamma-glutamylglutamine	Peptide	Gamma-glutamyl Amino Acid	2730	LC/MS Pos	1140	806	276.1	10148-81-9	150914	133013	C05283	HMDB11738	31846	87715	76007	77410	86554	134129	65334	79242	101945	89363	68544	113016	80129	150754	77866	87308	63453	83619	49722	158190
423	gamma-glutamylleucine	Peptide	Gamma-glutamyl Amino Acid	18369	LC/MS Pos	1268	2744	261.2	2566-39-4	151023	133115		HMDB11171		25593	31731	25116	15955	36800			11952	20847			61534	25383	29451	25643	27826	25675	21806
2757	gamma-tocopherol	Cofactors and Vitamins	Tocopherol Metabolism	42315	GC/MS	100001308	2264	223.1	54-28-4	14986	14266	C02483	HMDB01492	43893	47600	47030	106506	42740	49509	55333	190411	141905	334902	53063	69748	49679	449128	49541	86881	255329	87734	9532	103180
3020	gluconate	Xenobiotics	Food Component/Plant	587	GC/MS	338	1879.4	333	527-07-1	10690	10240	C00257	HMDB00625	112452	174217	834338	123558	136536	134608	111503	108013	137316	104144	311693	92994	340252	58271	80255	89470	109015	58362	85759	125309
821	glucose	Carbohydrate	Glycolysis, Gluconeogenesis, and Pyruvate Metabolism	20488	GC/MS	572	1866.8	217.1	50-99-7	79025	71358	C00031	HMDB00122	1038414	7170220	6279209	9577795	5872011	7062268	6204457	6277404	4506053	5841676	1251309	1550094	655119	1337823	1636409	2281664	1231357	1572474	1419453	5032911
822	glucose 6-phosphate	Carbohydrate	Glycolysis, Gluconeogenesis, and Pyruvate Metabolism	31260	GC/MS	291	2042.7	387.2	103192-55-8	5958	19952394	C00668	HMDB01401	1007917	3294968	1418423	972105	463029	1412760	720393	1244195	1109365	308824	1808097	1077288	3335001	871930	926855	763866	87035	1719989	4547045	859456
39	glutamate	Amino Acid	Glutamate Metabolism	57	LC/MS Pos	561	700	148.1	56-86-0	611	591	C00025	HMDB00148	6535893	8102822	7752496	5963320	6478864	8084045	5821445	8107617	10476236	7243660	6653144	14923384	10425410	11853475	9024491	9968363	10728806	12765649	10615849	13123236
49	glutamate, gamma-methyl ester	Amino Acid	Glutamate Metabolism	33487	LC/MS Pos	100001103	1062	162.1	1499-55-4	68662	66546			62267	132267	84432	45053	125381	124995	55808	58976	100662	56470	108781	74521	140140	67094	139167	89687	213421	206640	63835	69910
40	glutamine	Amino Acid	Glutamate Metabolism	53	LC/MS Pos	563	684	147.2	56-85-9	5961	5746	C00064	HMDB00641	5848901	7090491	6087260	5998794	7083326	7809885	5106651	6685329	10734432	5233273	6461806	10807077	4358030	7684304	5019846	6373867	5069504	6420974	4728439	10543783
401	glutathione, oxidized (GSSG)	Amino Acid	Glutathione Metabolism	27727	LC/MS Pos	448	1535	613.1	103239-24-3	65359	58835	C00127	HMDB03337	3386610	3860955	2199665	3955011	4162078	4197766	2991371	3490710	3472635	3404467	4151275	6069207	2917426	2687571	2731090	4731547	2640786	3288586	3686504	2882264
400	glutathione, reduced (GSH)	Amino Acid	Glutathione Metabolism	2127	LC/MS Pos	496	1274	308.1	70-18-8	124886	111188	C00051	HMDB00125	458249	1763868	3401832	304860	262159	224181	115022	442848	542474	1218967	5427219	342054	7051301	262767	5037167	404769	8993734	5733619	5254722	4537411
1703	glycerol	Lipid	Glycerolipid Metabolism	15122	GC/MS	1254	1311	205	56-81-5	753	733	C00116	HMDB00131	3601182	4045797	3700564	3979970	3924036	4093776	3625103	5413058	2790017	4384850	7232993	1526035	5663628	3669497	4416513	3707047	5483496	5245346	5153345	3478300
1704	glycerol 3-phosphate	Lipid	Glycerolipid Metabolism	15365	GC/MS	100000258	1719.7	357.1	29849-82-9	754	734	C00093	HMDB00126	1929495	2509804	1562185	2338200	1940514	1815128	1103439	1252994	1506796	1733255	3115441	1564857	2653175	767764	3022993	3319555	1608539	1295963	3280931	1613265
1463	glycerophosphoethanolamine	Lipid	Phospholipid Metabolism	37455	GC/MS	100001620	1906	357.1	33049-08-0	123874	110410	C01233	HMDB00114	273948	431846	245554	276757	324109	253462	156154	167810	183664	311489	400660	90614		116332	604247	442333	525354	189313	642444	120019
1709	glycerophosphoglycerol	Lipid	Glycerolipid Metabolism	48857	GC/MS	100001619	1969	357.3		439964	388990	C03274		54833	56768	36624	38139	50608	48760	52764	29819	29208	43965	233974	36638	154004	39842	219121	76538	129184	58530	419719	31601
1457	glycerophosphorylcholine (GPC)	Lipid	Phospholipid Metabolism	15990	LC/MS Pos	100000269	694	258.1	28319-77-9	71920	571409	C00670	HMDB00086	6738789	7407542	5005894	7432128	6670616	5608305	3942351	3807568	5386992	6194680	6369450	1941287	7307282	2051611	8871857	9229124	4547681	3558117	10388961	2992982
1	glycine	Amino Acid	Glycine, Serine and Threonine Metabolism	11777	GC/MS	340	1166	101.9	56-40-6	750	730	C00037	HMDB00123	22337326	40930888	25358678	22487594	27677892	28554398	20728040	25675370	19888920	26175146	42378016	51225416	40143196	23695298	28212180	32843994	39399732	48426240	43605224	20442008
1972	glycochenodeoxycholate	Lipid	Primary Bile Acid Metabolism	32346	LC/MS Neg	1628	5245	448.4	16564-43-5	12544		C05466	HMDB00637			1991	7503		7035	5125		3139	12424				9382		2740	19779		10905	4710
1969	glycocholate	Lipid	Primary Bile Acid Metabolism	18476	LC/MS Neg	342	5104	464.4	475-31-0;863-57-0	10140	9734	C01921	HMDB00138				8111			2892			39384				5498			94618		1981
2015	glycocholenate sulfate*	Lipid	Secondary Bile Acid Metabolism	32599	LC/MS Neg	100001989	4763	254.8						4818		8315	38117	6886		5038			46057	4582			14658	4440		44242		2641
1987	glycodeoxycholate	Lipid	Secondary Bile Acid Metabolism	18477	LC/MS Neg	100000436	5265	448.4	360-65-6	3035026		C05464	HMDB00631			2980	4358			2779			33559				5712			65138
1993	glycolithocholate sulfate*	Lipid	Secondary Bile Acid Metabolism	32620	LC/MS Neg	100001657	5015	512.3	15324-64-8	72222	65188	C11301	HMDB02639		2390		7601	4370		3355			11795		3218		4762			15357			3255
558	glycylleucine	Peptide	Dipeptide	34398	LC/MS Pos	100001258	2236	189.1	869-19-2	92843	83812	C02155	HMDB00759	29255	80702	30967	55153	37118	58343	28600	27862	28077	55051	91191	85310	69384	100405	36562	88607	89864	72481	57249	36097
568	glycylvaline	Peptide	Dipeptide	18357	LC/MS Pos	100000487	1572	175.1	1963-21-9	97417	2006926		HMDB28854	21196			10243		17826	18558			18979		29639	16865	44894	9689	20300	35481	17549	23975	19286
381	guanidinoacetate	Amino Acid	Creatine Metabolism	1480	GC/MS	344	1581	171	352-97-6	763	743	C00581	HMDB00128			24296	37554	33026	32689	22552	17821	32849	29222	17759				28254	41826	31611	29480	47259	21263
2628	guanine	Nucleotide	Purine Metabolism, Guanine containing	418	GC/MS	172	1942.3	352.1	73-40-5	764	744	C00242	HMDB00132	31925	79064	55406	20265	57313	54005	75337	92261	38803	30466	4865	45788	25948	25896	55707	26292	20014	26156	8724	272470
2627	guanosine	Nucleotide	Purine Metabolism, Guanine containing	1573	LC/MS Pos	1099	1676	284	118-00-3	6802	6544	C00387	HMDB00133	391657	675489	626206	437175	702813	701011	444273	652511	469746	552666	196786	958594	244791	618659	621173	694525	197017	289943	196806	909921
2623	guanosine 3'-monophosphate (3'-GMP)	Nucleotide	Purine Metabolism, Guanine containing	39786	LC/MS Neg	100002704	792.2	362.1	117-68-0	3522	3402			23528	30349	9171	29940	21583	20767	15813	7886		12984	14488	4605	8644	4521	6126	5723	7484	16061
2622	guanosine 5'- monophosphate (5'-GMP)	Nucleotide	Purine Metabolism, Guanine containing	2849	LC/MS Pos	347	1300	364	5550-12-09	6804	741	C00144	HMDB01397	471826	407795	39096	453898	419249	421761	286945	127642	230807	252565	611551	12787	569866	18553	288390		665199	611243	618388
960	guanosine 5'-diphospho-fucose	Carbohydrate	Nucleotide Sugar	15903	LC/MS Neg	335	797	588.1	15839-70-0		21402997			6013	5129	5032	4661	6163	7703		4048		4810	9497	5736	8023	4344	5862	6928	5974	7927	6340
2787	heme	Cofactors and Vitamins	Hemoglobin and Porphyrin Metabolism	41754	LC/MS Neg	100001386	5309.6	646.1	14875-96-8	26945		C00032	HMDB03178	105163	133245	102547	86060	30945	86416	196741	159811	79637	55916	41520	25750	34018	34157	11889	52450	10051	129927	10921	26618
1031	heptanoate (7:0)	Lipid	Medium Chain Fatty Acid	1644	LC/MS Neg	925	3695	129.2	111-14-8	8094	7803	C17714	HMDB00666	2956	4842		3139	2960		2350	4658	2259	3224	3908	3487	2355	4847	3433	5130	3382	4629	3172	3990
1260	hexanoylcarnitine	Lipid	Fatty Acid Metabolism(Acyl Carnitine)	32328	LC/MS Pos	100000781	3174	260.2	6920-35-0	6426853	4932273		HMDB00705	125884	281098	661838	676855	114737	194474	326345	133367	312973	187823	230530	387863	513235	524009	307895	584526	366842	443841	964227	325093
68	histamine	Amino Acid	Histidine Metabolism	1574	LC/MS Pos	354	570	112.2	51-45-6	774	753	C00388	HMDB00870	937604	1921639	1928950	1756496	1093110	1907543	1041090	1847878	1691914	1017412	830919	1970086	821349	1383129	1135501	1445383	1315170	1282150	163287	1049299
55	histidine	Amino Acid	Histidine Metabolism	59	LC/MS Neg	355	757	154.1	5934-29-2	6274	752	C00135	HMDB00177	19743	32274	26604	21853	33165	33582	18257	20112	15744	27600	27265	35112	31032	33466	25572	38861	32296	29841	29650	19007
337	hypotaurine	Amino Acid	Methionine, Cysteine, SAM and Taurine Metabolism	590	GC/MS	358	1598.5	188	300-84-5	107812	96959	C00519	HMDB00965	185958	377958	235182	218893	264513	165867	165439	135045	143463	260585	563709	499031	1354997	595042	404085	400604	749632	261120	631383	363938
2573	hypoxanthine	Nucleotide	Purine Metabolism, (Hypo)Xanthine/Inosine containing	3127	LC/MS Neg	171	1313	135.1	68-94-0	790	768	C00262	HMDB00157	78528	98647	80335	51812	93825	87996	57775	64409	59660	65936	108485	116303	115416	91260	82414	113316	94042	77075	97485	77759
2792	I-urobilinogen	Cofactors and Vitamins	Hemoglobin and Porphyrin Metabolism	32426	LC/MS Neg	100001226	4181	591.3	14684-37-8	26818	24980	C05790	HMDB04157				4370	4076					16165				11875			45239		3185
66	imidazole propionate	Amino Acid	Histidine Metabolism	40730	LC/MS Pos	100003434	1011.7	141.1	1074-59-5	70630	63798		HMDB02271		242402	66150		17971	16176			204724	328359	7741	79305	235916	16319	24845	24884	478998		438812
212	indolelactate	Amino Acid	Tryptophan Metabolism	18349	GC/MS	100000463	1964.9	202	832-97-3	92904	83867	C02043	HMDB00671	7401	15531		10895	15634	15059	29352		8230			10645	17438	10751			21248	16492	25437	15085
2572	inosine	Nucleotide	Purine Metabolism, (Hypo)Xanthine/Inosine containing	1123	LC/MS Neg	361	1600	267.2	58-63-9	6021	21241953	C00294	HMDB00195	424090	709980	524775	419481	669838	512476	414753	553290	494904	598358	405039	719370	430863	578986	608783	542374	404968	426841	431201	741468
2571	inosine 5'-monophosphate (IMP)	Nucleotide	Purine Metabolism, (Hypo)Xanthine/Inosine containing	2133	LC/MS Pos	362	1310	349	4691-65-0	8582	5482599	C00130	HMDB00175	573073	284104	27513	232458	251023	492506	372456	82828	191625	198313	441101		272260		93508		178468	347308	167175
1435	inositol 1-phosphate (I1P)	Lipid	Inositol Metabolism	1481	GC/MS	370	2057.8	318.1	573-35-3;106032-59-1	440194	17215924	C04006	HMDB00213	234248	371063	213021	210485	347058	210933	148828	212145	196759	185332	535430	157710	270913	241918	352925	173752	403603	310570	272778	170382
828	Isobar: fructose 1,6-diphosphate, glucose 1,6-diphosphate, myo-inositol 1,4 or 1,3-diphosphate	Carbohydrate	Glycolysis, Gluconeogenesis, and Pyruvate Metabolism	36984	LC/MS Neg	100002180	572	339						16773	6597	6843	12754	11225	19356	6411	10960	20223	12179	85305	4718	19738	13448	24300	26877	40503	15829	58029	15778
299	isobutyrylcarnitine	Amino Acid	Leucine, Isoleucine and Valine Metabolism	33441	LC/MS Pos	100001055	1941	232.2	25518-49-4	168379			HMDB00736	112621	466560	620774	337113	543499	854947	399679	78517	350910	282103	27287	72491	1169849	138668	453377	282882	405090	90248	588578	108249
283	isoleucine	Amino Acid	Leucine, Isoleucine and Valine Metabolism	1125	LC/MS Pos	376	1614	132.1	73-32-5	6306	769	C00407	HMDB00172	4228158	5835217	4834226	4727695	6144845	6749572	3565477	3798442	3570168	5433659	5846759	9473265	8502465	7526589	6331650	11765835	9169297	5519795	8006048	6483466
592	isoleucylglycine	Peptide	Dipeptide	40008	LC/MS Pos	100003169	1732	189.2	868-28-0	342532	303621			15067	32268	28622		36688	19066		31675	15071	21581	37195	45957	47498	43707	28286	38253	36483	29022	18698	23533
262	isovalerylcarnitine	Amino Acid	Leucine, Isoleucine and Valine Metabolism	34407	LC/MS Pos	100001393	2533	246.2	31023-24-2	6426851	4932271		HMDB00688	38908	77853	297383	182453	236410	353813	219515		80420	111725		60140	845077	118628	260481	191856	78621	31389	335611	83965
218	kynurenine	Amino Acid	Tryptophan Metabolism	15140	LC/MS Pos	100000265	1902	209.1	2922-83-0	161166	141580	C00328	HMDB00684	126196	226593	162555	215419	258459	332965	133385	77847	70675	170923	266470	383880	306377	375184	246494	821103	348153	154188	767917	139953
2794	L-urobilin	Cofactors and Vitamins	Hemoglobin and Porphyrin Metabolism	40173	LC/MS Pos	100002568	4091	595.4	34217-90-8	5280818	4444369	C05793	HMDB04159	10053		46048	22160			292117						52720	31360						23035
838	lactate	Carbohydrate	Glycolysis, Gluconeogenesis, and Pyruvate Metabolism	527	GC/MS	482	1102.8	116.9	79-33-4	612	592	C00186	HMDB00190	87412592	101050568	117185648	84609400	98068008	120000544	87681656	88841776	68864040	86955336	198581456	134058648	264428672	145861568	135152224	135448048	213780160	118472984	230688864	82414712
1801	lathosterol	Lipid	Sterol	33488	GC/MS	100001105	2337	458.5	80-99-9;80-99-9	65728	59151	C01189	HMDB01170	15084	16155	19896	12673	7471	24297	26262	11308	10932	9979	32246	11405	36806	23082	21049	25488	117599	47497	106898
1266	laurylcarnitine	Lipid	Fatty Acid Metabolism(Acyl Carnitine)	34534	LC/MS Pos	100001392	5066	344.3	25518-54-1	10427569	8602997		HMDB02250												76172	28094	232785			43484
254	leucine	Amino Acid	Leucine, Isoleucine and Valine Metabolism	60	LC/MS Pos	397	1674	132.2	61-90-5	6106	5880	C00123	HMDB00687	7321778	13342061	9737455	9579319	12082385	15765180	7469917	8549071	5725600	12380904	10858440	16502565	17088158	15613734	10282683	20838030	18365028	11047966	15367668	8628849
610	leucylglycine	Peptide	Dipeptide	40045	LC/MS Pos	100003185	1800	189.2	686-50-0	79070	71402				94613	35540	15264	18810	7747		28970		18408	42211	34807	30062	36528	32266	20017	23648	50779		30039
1083	linoleate (18:2n6)	Lipid	Polyunsaturated Fatty Acid (n3 and n6)	1105	LC/MS Neg	180	5533	279.3	60-33-3	5280450	4444105	C01595	HMDB00673	3370646	4308683	2968729	4259096	6529422	3456441	4234387	5828676	6253105	6146962	3301299	1944693	2176890	4383023	5199397	2216959	2641611	3653152	2705629	1708085
1085	linolenate [alpha or gamma; (18:3n3 or 6)]	Lipid	Polyunsaturated Fatty Acid (n3 and n6)	34035	LC/MS Neg	100001337	5450	277.3		5280934	4444437	C06426	HMDB03073	435942	311976	252032	522278	807514	284832	468169	1204119	1086836	975073	344041	125075	139307	385131	625809	171888	283484	535544	216573	141914
77	lysine	Amino Acid	Lysine Metabolism	1301	LC/MS Pos	407	603	147.2	56-87-1	5962	5747	C00047	HMDB00182	563021	616786	627677	580352	618922	667324	450203	495498	429726	751461	447436	515253	814364	637012	506724	688487	755874	555007	577424	380637
1015	malate	Energy	TCA Cycle	1303	GC/MS	409	1502	233	6915-15-7	525	510	C00149	HMDB00156	1677879	1942791	2336787	1667723	1612458	2236779	1112782	1399880	1399866	1824753	3183927	1449385	3920640	1182318	1972354	1215187	2613780	2176344	2386608	1205887
889	maltose	Carbohydrate	Glycogen Metabolism	15806	GC/MS	913	2142.1	204.1	6363-53-7	10991489	388469	C00208	HMDB00163	200150	275269	183805	312110	2575024	354387	68592	153192	93580	1959504	239873	153270	236189	425928	1235803	362212	4282272	234159	755433	124875
884	maltotetraose	Carbohydrate	Glycogen Metabolism	15910	LC/MS Neg	100000275	965	665.1	34612-38-9	446495	393830	C02052	HMDB01296	11107	40778	10359	16097	58343	11106		11266	10217	38347	9539		8824	3479	63657		91035	11599	51146	8773
886	maltotriose	Carbohydrate	Glycogen Metabolism	15877	GC/MS	100000276	2419	204	1109-28-0	439586	388669	C01835	HMDB01262	53044	180285	45669	28106	535247	35324		37120	24143	379212	73018		43364	16481	361764	15323	678655		220400	24992
935	mannitol	Carbohydrate	Fructose, Mannose and Galactose Metabolism	15335	GC/MS	100000277	1839	319.1	69-65-8	6251	6015	C00392	HMDB00765	81519	50398	309493	274471	303335	180865	328652	206662	137085	308580	188666	20352	238087	227734	269568	175276	310628	195141	145297	294442
931	mannose	Carbohydrate	Fructose, Mannose and Galactose Metabolism	584	GC/MS	803	1753.5	204	3458-28-4	18950	141983	C00159	HMDB00169	197666	850757	485450	669112	562622	585608	500001	465081	385930	454002	242097	155697	179500	189398	266533	200209	138716	191654	184118	331150
932	mannose-6-phosphate	Carbohydrate	Fructose, Mannose and Galactose Metabolism	1470	GC/MS	294	2035.9	387.2	70442-25-0;104872-94-8	439198	19969422	C00275	HMDB01078	236850	628964	258619	187130	151668	287761	130804	250881	174541	74891	355718	162533	593455	140810	173844	200651	41867	281627	535435	196212
1046	margarate (17:0)	Lipid	Long Chain Fatty Acid	1121	LC/MS Neg	891	5733	269.3	506-12-7	10465	10033		HMDB02259	229550	211236	215380	221095	241703	239261	241281	219766	203216	228103	226570	147276	202182	185277	206219	164028	174523	162413	227454	160197
311	methionine	Amino Acid	Methionine, Cysteine, SAM and Taurine Metabolism	1302	LC/MS Pos	415	1252	150.1	63-68-3	6137	5907	C00073	HMDB00696	929337	1426045	1053166	960851	1358146	1373423	641881	1005483	1022674	1225964	1121974	2063312	1188755	1569323	1306749	1902982	1703175	1029636	1367626	1532782
316	methionine sulfoxide	Amino Acid	Methionine, Cysteine, SAM and Taurine Metabolism	18374	LC/MS Pos	100000039	729	166.1	3226-65-1	158980	139840	C02989	HMDB02005	42244	31618		34847	36879	38555	23175	36263	21929	16047		66907	45857	50566	23819	27476	21589	25872	23530	17524
2707	methylphosphate	Nucleotide	Purine and Pyrimidine Metabolism	37070	GC/MS	100001805	1221	241	7023-27-0	13130	12578		HMDB61711	341033	728495	320677	369100	472394	356811	269087	325797	373239	302679	646819	312012	549036	305347	546388	324055	522321	644078	427919	237218
1427	myo-inositol	Lipid	Inositol Metabolism	19934	GC/MS	363	1924.9	217	87-89-8	892	10239179	C00137	HMDB00211	46788516	73978496	37647132	35846912	52774732	38594268	32169144	42064992	39005504	40234668	101271512	19465066	26682432	18199238	34850092	23994906	30718820	32278044	27475348	36634272
1040	myristate (14:0)	Lipid	Long Chain Fatty Acid	1365	LC/MS Neg	519	5439	227.3	544-63-8	11005	10539	C06424	HMDB00806	733560	699540	533882	743296	660509	751185	690620	803986	633395	760044	538700	642787	837332	727603	599766	642147	743448	764940	587366	644645
1041	myristoleate (14:1n5)	Lipid	Long Chain Fatty Acid	32418	LC/MS Neg	100001198	5338	225.3	544-64-9	5281119	4444564	C08322	HMDB02000	27554	32391	24588	32537	30300	32731	28749	32742	24569	33613	36893	20224	30972	37034	23781	47581	33330	37901	32165	22695
1267	myristoylcarnitine	Lipid	Fatty Acid Metabolism(Acyl Carnitine)	33952	LC/MS Pos	100001270	5113	372.4	18822-89-4	53477791	4932274		HMDB05066	52875	48749	180539	102895	85029	79157	174685	164962	66679	108334	64747	100968	117510	58337	66366	63155	73005	152669		167087
43	N-acetyl-aspartyl-glutamate (NAAG)	Amino Acid	Glutamate Metabolism	35665	LC/MS Pos	100001612	1563	305	3106-85-2	5255	5065	C12270	HMDB01067		29453	19289	20819	31275	18592	18081	26623	19493	30808	20478				18748		19549			22749
97	N-acetyl-cadaverine	Amino Acid	Lysine Metabolism	43530	LC/MS Pos	100002249	1245	145.2	32343-73-0					45356	42657	200842		23099	36070	25228		19878	34695	12847		199794	24671		21694	45040		18770
26	N-acetylalanine	Amino Acid	Alanine and Aspartate Metabolism	1585	LC/MS Neg	1110	882	130.1	97-69-8	88064	79449	C02847	HMDB00766	3166	3247	2771	3618	4687	3933				3011	4469	7643	5929	5616	5910	6667	4823	5651	4809	6039
32	N-acetylaspartate (NAA)	Amino Acid	Alanine and Aspartate Metabolism	22185	LC/MS Pos	100000787	1222	176.1	997-55-7;997-55-7	65065	58576	C01042	HMDB00812	120132	150520	106064	153265	130727	155856	96281	159252	145791	129132	108775	99774	55247	68453	131167	105292	83815	102970	54334	78906
982	N-acetylgalactosamine	Carbohydrate	Aminosugar Metabolism	2766	GC/MS	1106	1887.4	245.1	14215-68-0	35717	32855	C01074	HMDB00212	18089	257714	63184	14524	24209	19845	10531	79594	8775					21665	18846		21936	61225	130389	23928
983	N-acetylmannosamine	Carbohydrate	Aminosugar Metabolism	15060	GC/MS	1217	1915.9	245.1	7772-94-3	439281	388414	C00140	HMDB01129	75776	60274	132424	19987	46291	115915	66648	57624	36058	33807	19812	29500	23604	14284	22492	64330	51655	46228	39419	26376
312	N-acetylmethionine	Amino Acid	Methionine, Cysteine, SAM and Taurine Metabolism	1589	LC/MS Neg	1083	1805	190.1	65-82-7	448580	395338	C02712	HMDB11745	9746	11455	8573	8872	12550	12198	7255	7324	5249	11400	7642	9978	15287	6949	7483	10753	13811	9872	13180	5614
986	N-acetylneuraminate	Carbohydrate	Aminosugar Metabolism	32377	LC/MS Pos	1162	787	310	131-48-6	439197	10292217	C00270	HMDB00230	251352	439034	286657	117070	153480	308334	268595	274027	175786	78867	181984	80831	205808	95438	218233	106310	214391	298718	240116	168842
10	N-acetylserine	Amino Acid	Glycine, Serine and Threonine Metabolism	37076	LC/MS Pos	100001851	1012	148	97-14-3	65249	58744		HMDB02931	31017	31292	64472	30194	46751	90261	32869	60513	38124	27401	38228	71517	96077	65431	55165	73316	59272	53853	72508	95282
15	N-acetylthreonine	Amino Acid	Glycine, Serine and Threonine Metabolism	33939	LC/MS Neg	100001274	846	160.1	17093-74-2	152204	3841173														6122	5415	5253		5584	6129	5063	6250
362	N-delta-acetylornithine*	Amino Acid	Urea cycle; Arginine and Proline Metabolism	43249	LC/MS Pos	100004523	836.2	175.1		9920500	8096135			30945	26285	62175	30725	40701	55794	45550	19216	20083	30051	37259	23653	82826	50850	27769	46207	27827	23598	17836	46845
1767	N-palmitoyl-sphingosine (d18:1/16:0)	Lipid	Sphingolipid Metabolism	44877	GC/MS	1518	2609	370.3	24696-26-2	5283564	4446677		HMDB04949	289710	311623	177708	113986	179372	237792	136969	156745	122389	109655	180183	41761	202534	203101	130497	154556	227158	275879	179020	58043
2600	N1-methyladenosine	Nucleotide	Purine Metabolism, Adenine containing	15650	LC/MS Pos	1242	1356	282.1	15763-06-1	27476	4573813	C02494	HMDB03331	20589	32087	26118	20690	27981	29423	19024	22334	19603	23572	36391	43639	51726		27089	67226	30681	26467	27422	64950
2713	nicotinamide	Cofactors and Vitamins	Nicotinate and Nicotinamide Metabolism	594	LC/MS Pos	432	1267	123.1	98-92-0	936	911	C00153	HMDB01406	2212511	3186004	2229884	2209038	1403945	3077153	1920992	2711647	1842797	1983389	3785490	2367883	1875711	1267126	1725624	2281109	2239897	3067555	2205991	2464833
2717	nicotinamide adenine dinucleotide (NAD+)	Cofactors and Vitamins	Nicotinate and Nicotinamide Metabolism	5278	LC/MS Pos	1310	1370	664	53-84-9	5893	5681	C00003	HMDB00902	29872	31819	32429	35521	33083	38796	25279	30727	28647	32180	684075	101177	44047	23750	87482	23616	339872	39063	88333	239415
2718	nicotinamide adenine dinucleotide reduced (NADH)	Cofactors and Vitamins	Nicotinate and Nicotinamide Metabolism	31475	LC/MS Neg	428	1554	664.1	58-68-4;606-68-8	439153	388299	C00004	HMDB01487											10117	2499					6858		1649
2710	nicotinate	Cofactors and Vitamins	Nicotinate and Nicotinamide Metabolism	1504	LC/MS Neg	567	1221	122.1	59-67-6	938	913	C00253	HMDB01488	3924	4882	3522	3871	5801		1981		2367	4901	5031		2370	3841	4539		2684	5457	6020
1056	nonadecanoate (19:0)	Lipid	Long Chain Fatty Acid	1356	LC/MS Neg	892	6073	297.3	646-30-0	12591	12071	C16535	HMDB00772	28147	22799	21746	20923	21011	25017	25080	19023	18440	20247	31461	17208	29284	25524	15851	17173	12402	19816	24183	19073
1261	octanoylcarnitine	Lipid	Fatty Acid Metabolism(Acyl Carnitine)	33936	LC/MS Pos	100001247	4100	288.3	3671-77-0	123701	110274	C02838	HMDB00791	18915	46345	103600	104961		28246	44715	42855	47123	21589	72082	109199	96751	216559	64725	277391	86897	181777	133696	107820
1050	oleate (18:1n9)	Lipid	Long Chain Fatty Acid	1359	GC/MS	442	1984.4	339.2	112-80-1	445639	393217	C00712	HMDB00207	2299113	2097159	1857046	2004765	2665758	1910556	1763195	3065136	2340503	2352128	2989328	1630094	2361492	2266494	2314407	1755750	2133821	2771537	1975376	1423806
1411	oleoyl ethanolamide	Lipid	Endocannabinoid	38102	LC/MS Neg	1137	6553	324.5	11-58-0;111-58-0	5283454	4446574		HMDB02088	7813	8836		4624	5954	5629		4678	4378		8894		9223	5878	6824	6913	8787	8663	8294	6101
1272	oleoylcarnitine	Lipid	Fatty Acid Metabolism(Acyl Carnitine)	35160	LC/MS Pos	100001501	5202	426.4	38677-66-6	6441392;53477789	21403150		HMDB05065	45786		18329	58139	189476	39281					145922	1103715	515769	1966079	359477	144401	712858	8489	350687
409	ophthalmate	Amino Acid	Glutathione Metabolism	34592	LC/MS Pos	100001311	1457	290.1	495-27-2	7018721	7993181		HMDB05765	410768	745337	516441	310596	606478	666321	652264	463309	383325	359879	700967	345269	501222	260873	365131	379597	132785	456099	141889	555009
349	ornithine	Amino Acid	Urea cycle; Arginine and Proline Metabolism	1493	GC/MS	444	1763.8	142	3184-13-2	6262	6026	C00077	HMDB03374	345943	873153	629495	788963	574108	707457	494662	482059	494239	747913	436874	993204	445766	1837483	406226	885793	879453	884103	763440	549407
137	p-cresol sulfate	Amino Acid	Phenylalanine and Tyrosine Metabolism	36103	LC/MS Neg	100001315	2896	187.1	3233-57-7	4615423	3806480	C01468	HMDB11635	3268		115852	39411		2373	105295	3760	4033				59793	28697				4106	9614	69729
1044	palmitoleate (16:1n7)	Lipid	Long Chain Fatty Acid	33447	LC/MS Neg	452	5477	253.3	373-49-9	445638	393216	C08362	HMDB03229	669422	709346	419311	762892	994862	643222	756562	1138958	705466	1150523	599676	466782	715057	1019154	925020	758843	868873	980708	437140	303111
1414	palmitoyl ethanolamide	Lipid	Endocannabinoid	38165	LC/MS Neg	1489	6416	298.4	544-31-0	4671	4509	C16512	HMDB02100	3912	3950	3518	5909	5070	5090	2574			3459	4030	4674	3829	3954	3616	5805	5393	5211	3812	7819
1753	palmitoyl sphingomyelin (d18:1/16:0)	Lipid	Sphingolipid Metabolism	37506	GC/MS	100002107	2524	311.3	6254-89-3	9939941	8115562			7658996	12636105	8211343	6720388	9910230	9514315	5995227	8265875	7390680	7026145	21808614	10361180	12240215	10367449	10409434	10859066	14176655	14522397	10313046	8248345
1269	palmitoylcarnitine	Lipid	Fatty Acid Metabolism(Acyl Carnitine)	22189	LC/MS Pos	100000776	5179	400.4	6865-14-1	461	448	C02990	HMDB00222	98171			123007	383524	62274				76626	442251	1208536	511257	2936951	464989	215477	994690	30310	795310
2738	pantothenate	Cofactors and Vitamins	Pantothenate and CoA Metabolism	1508	LC/MS Pos	1024	2218	220.1	137-08-6	6613	6361	C00864	HMDB00210	378514	121609	158328	349251	511989	108735	129902	232479	87821	158532	959818	246687	307550	128421	482140	300746	165048	339283	397507	174031
3471	phenobarbital	Xenobiotics	Drug	27733	LC/MS Neg	100001045	3197	231.1	50-06-6	4763	4599	C07434	HMDB15305	6966										11523
134	phenol sulfate	Amino Acid	Phenylalanine and Tyrosine Metabolism	32553	LC/MS Neg	100001510	2150	173.1	937-34-8	74426	67018	C02180	HMDB60015	4392	2845	30836	51984	16276	8414	15972	8081	4651	12999	4622	4649	20016	10042	8834	5172	5309	8768	6805	12349
117	phenylacetylglutamine	Amino Acid	Phenylalanine and Tyrosine Metabolism	35126	LC/MS Pos	100001417	2868	265.2	28047-15-6	92258	270643	C04148	HMDB06344	11660	11980	202501	96602		16475	96258	16849		33828			111850	70264		15170	33831			85660
105	phenylalanine	Amino Acid	Phenylalanine and Tyrosine Metabolism	64	LC/MS Pos	460	2056	166.1	63-91-2	6140	5910	C00079	HMDB00159	7336803	9498351	7198166	6024270	9074926	8532506	4881904	6864782	4460794	7793600	8408312	10905217	10335642	9181904	7209171	13037227	12529406	7786305	8296692	5075219
1028	phosphate	Energy	Oxidative Phosphorylation	11438	GC/MS	461	1307.7	298.9	7664-38-2	1061	1032	C00009	HMDB01429	94545992	105622816	87054760	82718296	116205096	122279600	73892232	84301024	84878400	104027544	168844512	105782648	164531968	103302576	127213608	124956424	168194448	129084744	140708832	102975408
836	phosphoenolpyruvate (PEP)	Carbohydrate	Glycolysis, Gluconeogenesis, and Pyruvate Metabolism	597	GC/MS	463	1595.4	369	10526-80-4	1005	980	C00074	HMDB00263	8606		6412	41791	10028	38647	6115	20989	8134	28444	65841	78269		25845	3167	28484	18644	1260	42803	3859
1461	phosphoethanolamine	Lipid	Phospholipid Metabolism	12102	GC/MS	1026	1577.3	299.1	1071-23-4	1015	990	C00346	HMDB00224	10075568	10483558	7840393	10087244	13247529	11846674	7581161	8512506	6922520	12849399	24095508	9881984	10061074	6856157	10800696	9853166	16771148	9612734	16907774	9302862
95	pipecolate	Amino Acid	Lysine Metabolism	1444	LC/MS Pos	1025	1120	130.1	4043-87-2	849	826	C00408	HMDB00070	15048		33639	14114	15800	27073		21132	30077		35117	19762	68166	22344	19664	32562	25913	38734	53991	43880
1874	pregnen-diol disulfate*	Lipid	Steroid	32562	LC/MS Neg	100001993	3886	238.3							4592	8599	20307		3020	9351	5454	2701			3054	3578	11809		1945		5457	3687	7361
370	pro-hydroxy-pro	Amino Acid	Urea cycle; Arginine and Proline Metabolism	35127	LC/MS Pos	100001167	960	229.2	18684-24-7	11673055	9847785		HMDB06695	20931	21433	26461	27990	27792	36258	39226	23371		40937	30485	108776	81536	167060	88551	65603	89801	54885	39564	47790
350	proline	Amino Acid	Urea cycle; Arginine and Proline Metabolism	1898	LC/MS Pos	480	796	116.1	147-85-3	145742	128566	C00148	HMDB00162	2837855	2086922	2647988	2558954	2355267	3177015	2021581	2013596	1909692	2185571	4799119	4736186	6856483	4343350	4533119	5832399	5269847	4247470	11598581	2422070
1242	propionylcarnitine	Lipid	Fatty Acid Metabolism (also BCAA Metabolism)	32452	LC/MS Pos	100001162	1589	218.2	17298-37-2	107738	96904	C03017	HMDB00824	457552	719733	899746	1189586	778613	1312965	968463	359144	588299	1113343	504975	849168	2434094	605097	775011	653873	1301227	647198	1060420	555144
1349	prostaglandin E2	Lipid	Eicosanoid	7746	LC/MS Neg	487	4562	351.3	363-24-6	5280360	4444059	C00584	HMDB01220	9201		5699	3946	20985	9981				5536	5818		9023	4155	9468	12440
3481	pseudoephedrine	Xenobiotics	Drug	39586	LC/MS Pos	100002738	2328.5	166.1	90-82-4	7028	6761	C02765	HMDB01943					66362				156398						39203				102869
2662	pseudouridine	Nucleotide	Pyrimidine Metabolism, Uracil containing	33442	LC/MS Pos	821	1180	245	1445-07-4	15047	21403010	C02067	HMDB00767	19279	26393	32230	21960	23725	32516	28526	22961	16524	24004	22888	43924	53704	43339	23586	44004	27080	21393	26179	27975
385	putrescine	Amino Acid	Polyamine Metabolism	1408	GC/MS	49	1705.8	174	110-60-1	1045	13837702	C00134	HMDB01414	296015	1011330	665117	84544	266009	374227	344981	396436	204808	218861	838883	257095	1539237	202748	157822	191705	826863	590289	515962	79627
50	pyroglutamine*	Amino Acid	Glutamate Metabolism	32672	LC/MS Pos	100001540	764	129.2	2353-44-8	134508	118562			86939	149961	143180	161174	29294	143117	59119	54579	75045	61518	104104	174030	716838	207114	51941	210083	325093	139315	308050	83290
2709	quinolinate	Cofactors and Vitamins	Nicotinate and Nicotinamide Metabolism	1899	GC/MS	182	1697.7	296.1	89-00-9	1066	1037	C03722	HMDB00232				7683		12269		5438	4829		6103	8156	12754	9939	2343	15798	7715	4343	15238
855	ribose	Carbohydrate	Pentose Metabolism	12080	GC/MS	914	1639.2	204	50-69-1	5779	4470639	C00121	HMDB00283	36848	96869	67064	38043	40694	57724	68670	39237	20077	21784	32013	20890	62890	53726	56843	36062		75055
851	ribulose/xylulose 5-phosphate	Carbohydrate	Pentose Phosphate Pathway	37288	GC/MS	100002179	1935	357.2				C00199		539736	1302983	677201	539588	717541	919189	563147	756414	791206	484039	582491	619504	609279	536581	568745	836996	444981	630102	695254	760220
319	S-adenosylhomocysteine (SAH)	Amino Acid	Methionine, Cysteine, SAM and Taurine Metabolism	15948	LC/MS Neg	197	1821	383.1	979-92-0	439155	16788012	C00021	HMDB00939	18465	25217	18902	16201	24253	24571	19212	16365	14565	22464	23946	26046	41710	21050	24057	28397	21465	30984	33851	18585
405	S-lactoylglutathione	Amino Acid	Glutathione Metabolism	15731	LC/MS Neg	1343	1271	378.2	54398-03-7	440018	1053	C03451	HMDB01066	2434	2416	4510					3557	6959		14870		14256		29271	2876	3362	5612	24802	12434
331	S-methylcysteine	Amino Acid	Methionine, Cysteine, SAM and Taurine Metabolism	39592	LC/MS Pos	100002749	869.1	136	1187-84-4	24417	22826		HMDB02108	28968	70084	60404	61839	36382	92181	98532	284627	47339	32268	34445	79676	74191	83351	44754	127059	31248	544942	81788	56967
4	sarcosine (N-Methylglycine)	Amino Acid	Glycine, Serine and Threonine Metabolism	1516	GC/MS	1023	1182.9	116	107-97-1	1088	1057	C00213	HMDB00271	90601	192693	310483	134014	452052	237481	137958	99747	97488	127583	160843	240304	599381	139340	254590	219110	295836	172653	259512	99973
1430	scyllo-inositol	Lipid	Inositol Metabolism	32379	GC/MS	100001215	1893.8	318.2	488-59-5	892	10254646	C06153	HMDB06088	1468145	1963606	479977	1183650	1943468	871898	591433	1697444	857769	1042586	3544099	307722	350496	468592	1116792	467130	775710	1706527	733454	527555
849	sedoheptulose-7-phosphate	Carbohydrate	Pentose Phosphate Pathway	35649	GC/MS	100001628	2070	691.35	2646-35-7	616	596	C05382	HMDB01068	22109	80457	31355	7961	44219	31907	29575	58473	22617	21480	34288	45259	34140	26744	32770	24281	26149	30602	24082	64283
9	serine	Amino Acid	Glycine, Serine and Threonine Metabolism	1648	GC/MS	503	1389.1	204	56-45-1	5951	5736	C00065	HMDB00187	4979354	9791323	6137908	5905330	8146347	8543071	4249626	7494679	7571069	7677178	6295706	10418210	9782519	6795838	6562449	8692577	8989622	7425224	9080429	6388237
234	serotonin	Amino Acid	Tryptophan Metabolism	2342	LC/MS Pos	504	1660	177.1	153-98-0	5202	5013	C00780	HMDB00259	121757	145570	143663	78717	92368	508694	187271	318920	158746	67932	61165	15603	38305	22476	107532	173072		115748		132746
928	sorbitol	Carbohydrate	Fructose, Mannose and Galactose Metabolism	15053	GC/MS	506	1843	319.1	6706-59-8	5780	96680	C00794	HMDB00247	47519		40398	27219	41799	34178	26040	17813	32895	61827	79336	18541	74020	26738	67839	33508	52107	20087	90695	18707
388	spermidine	Amino Acid	Polyamine Metabolism	485	LC/MS Pos	50	533	146.2	124-20-9	1102	1071	C00315	HMDB01257	113463	519726	258105	79828	70096	136108	566658	224870	94356	58047	165029	196056	295312	85063	133489	145785	148670	551986	117961	214302
386	spermine	Amino Acid	Polyamine Metabolism	603	LC/MS Pos	507	506	203.2	71-44-3	1103	1072	C00750	HMDB01256	18368	382736	96969	10209		29600	124328	56006	24019	10037		15721	60449	11864	16129	34414		222758	23364	78927
1750	sphinganine	Lipid	Sphingolipid Metabolism	17769	LC/MS Pos	313	5175	302.3	3102-56-5	3126	3014	C00836	HMDB00269	95449		16960	66402	301191	102862			43015	87410	109902	117230	212298	384608	340517	32424	636481		257032
1759	sphingosine	Lipid	Sphingolipid Metabolism	17747	LC/MS Pos	297	5197	300.2	123-78-4	5353955	4510275	C00319	HMDB00252	312463			108387	525614	225388	33535			146842	563951	689302	526230	1336941	806204	121384	2256175		594298
3195	stachydrine	Xenobiotics	Food Component/Plant	34384	LC/MS Pos	100001296	860	144.1	4136-37-2	115244	103115	C10172	HMDB04827	54440	357317	500403	469252	32296	142083	270876	54804	75327	16714	55363	379498	437968	534633	30058	170117	22089	64710	194380	240990
1754	stearoyl sphingomyelin (d18:1/18:0)	Lipid	Sphingolipid Metabolism	19503	GC/MS	1538	2645	311.3	85187-10-6;85187-10-6	6453725	4956085	C00550	HMDB01348	425399	897094	641478	583998	855917	739738	482166	815151	688342	667893	414092	779435	271579	329254	568702	789707	311165	341779	191710	1390972
1270	stearoylcarnitine	Lipid	Fatty Acid Metabolism(Acyl Carnitine)	34409	LC/MS Pos	100001391	5300	428.4	18822-91-8	6426855	21233653		HMDB00848	88190			161587	468207	87839	24799			123027	413298	863899	719414	4282683	304626	108279	650577		1049437
1013	succinate	Energy	TCA Cycle	1437	LC/MS Neg	252	618	117.1	110-15-6	1110	1078	C00042	HMDB00254	3669	4038	3741	5917	4458	6274	18053	4020	4674	7619	10527	18810	48172	34229	13854	12128	99594	22010	24954	6214
1012	succinylcarnitine	Energy	TCA Cycle	37058	LC/MS Pos	100001948	1401	262.1						58008	44303	14800	24220	36762	27575	34751	23649		17456	65368	28549	78162	29736	29260	30253	30154	66224	36249	26389
338	taurine	Amino Acid	Methionine, Cysteine, SAM and Taurine Metabolism	32975	LC/MS Pos	512	687	126.1	107-35-7	1123	1091	C00245	HMDB00251	173712	200631	153281	167202	162772	125479	131275	153640	176678	149982	267215	374961	569962	380255	237293	331605	296134	247548	228635	339868
1973	taurochenodeoxycholate	Lipid	Primary Bile Acid Metabolism	18494	LC/MS Neg	1629	5218	498.3	6009-98-9	387316	343282	C05465	HMDB00951				3967						4043				3855			8293		3822
1970	taurocholate	Lipid	Primary Bile Acid Metabolism	18497	LC/MS Neg	1648	5122	514.3	145-42-6	6675		C05122	HMDB00036				2022						7535							15714
2016	taurocholenate sulfate*	Lipid	Secondary Bile Acid Metabolism	32807	LC/MS Neg	100001990	4762	279.8									2930						13700							19363
1988	taurodeoxycholate	Lipid	Secondary Bile Acid Metabolism	12261	LC/MS Neg	1668	5243	498.3	207737-97-1	2733768	2015539	C05463	HMDB00896				2658						6893				3103			9724
2748	threonate	Cofactors and Vitamins	Ascorbate and Aldarate Metabolism	27738	GC/MS	100001022	1560.7	292.1	70753-61-6	151152	133224	C01620	HMDB00943	142321	158025	59299	326473	189637	320511	308309	266119	153216	147695	120787	284827	75191	138030	54385	148038	51324	165434	48343	34590
14	threonine	Amino Acid	Glycine, Serine and Threonine Metabolism	1284	LC/MS Pos	564	713	120.1	72-19-5	6288	6051	C00188	HMDB00167	699461	982066	685641	898109	1105163	1068324	576552	972113	987240	1231682	730823	1692024	1094383	1688286	957985	1468183	1750899	1432555	1675919	849007
719	threonylphenylalanine	Peptide	Dipeptide	31530	LC/MS Pos	100001125	2500	267.2	16875-27-7	4099799;4099798	3313819			26491	239030	48670					17664		15088	33740		44754	19752	19584	16146	23375	113479
2703	thymine	Nucleotide	Pyrimidine Metabolism, Thymine containing	604	GC/MS	882	1429.1	255	65-71-4	1135	1103	C00178	HMDB00262	21764	57244	35244	15974	13875	17232	10203	23904	3407	14312	15103	7506	61116	37917	19467	20698	37927	17022	30838	9852
368	trans-4-hydroxyproline	Amino Acid	Urea cycle; Arginine and Proline Metabolism	1366	GC/MS	1001	1537	140	51-35-4	5810	5605	C01157	HMDB00725	75059	107872	134752	119243	81485	162651	101039	86583	95271	82125	94374	471572	317229	342578	184346	264315	214421	227303	228526	177634
63	trans-urocanate	Amino Acid	Histidine Metabolism	607	LC/MS Pos	537	1119	139.1	104-98-3	736715	643824	C00785	HMDB00301	22107	15452	25393			20067		18890	18764	24911	6621	24062	30063	14314		23668	24973			24742
3700	trizma acetate	Xenobiotics	Chemical	20710	GC/MS	100000856	1525	306.2	6850-28-8	6503	73346	C07182		62920	54275	220377	34559	28294	37301	29262	7814	10663	72470	23672		64430	229977	45370	82927	10867	6880	56823	21927
208	tryptophan	Amino Acid	Tryptophan Metabolism	54	LC/MS Pos	565	2445	205.1	73-22-3	6305	6066	C00078	HMDB00929	1596650	1689309	1674979	1530809	1641096	1864406	1112771	1246181	843848	1754981	1877586	2453503	2425422	2498274	1322399	2593569	2544480	1779979	1382384	1328431
242	tryptophan betaine	Amino Acid	Tryptophan Metabolism	37097	LC/MS Pos	100001743	2464	247.1	20671-76-5	442106	390633	C09213	HMDB61115	51039	109915	57672	111220	301740	211638	278690	139432	179422	157580	33311	234717	153580	154115	322689	208273	217973	242509	330073	168673
118	tyrosine	Amino Acid	Phenylalanine and Tyrosine Metabolism	1299	LC/MS Pos	815	1516	182.1	60-18-4	6057	5833	C00082	HMDB00158	1947889	2766165	2277171	2178134	3420079	2968085	1458778	1858799	1620519	2780171	2855156	3711591	3232165	3187750	2595770	4507530	3518792	2415434	2968226	1892214
964	UDP-acetylglucosamine/galactosamine	Carbohydrate	Nucleotide Sugar	38673	LC/MS Pos	100002957	963	607.7						83179	93336	29949	119005	111999	171791	77819	71576	77491	147226	400926	245191	344662	192077	235498	121246	226546	307565	518941	152865
957	UDP-galactose	Carbohydrate	Nucleotide Sugar	15860	GC/MS	100000298	1973	243.1	2956-16-3;91183-98-1;137868-52-1	18068	17069	C00052	HMDB00302	15775	76815	34658	40927	67334	29980	12188	41019		41129	58354	22422	68831	23584	28741		95191	74619	95760
953	UDP-glucose	Carbohydrate	Nucleotide Sugar	32344	GC/MS	1096	1986	243.1	117756-22-6	8629	8308	C00029	HMDB00286	88040	180773	66661	83882	118534	85643	30763	101488	41610	83827	112439	24517	122274	44775	48612	24656	76337	151533	125406	31318
958	UDP-glucuronate	Carbohydrate	Nucleotide Sugar	2763	LC/MS Neg	1097	594	579.1	28053-08-9;63700-19-6	17473	16522	C00167	HMDB00935	19946	25041	11672	15137	19912	22604	14776	16223	8759	15092	39066	6097	33485	9864	29692	7472	31323	34382	33154	8699
2661	uracil	Nucleotide	Pyrimidine Metabolism, Uracil containing	605	GC/MS	825	1370.4	241	66-22-8	1174	1141	C00106	HMDB00300	839112	400348	1021353	530977	785018	832359	633849	305833	257776	1083665	1278381	1310015	2695749	858097	960545	1058560	2068515	991638	1065023	299885
2581	urate	Nucleotide	Purine Metabolism, (Hypo)Xanthine/Inosine containing	1604	LC/MS Neg	1134	769	167.1	69-93-2;120K5305	1175		C00366	HMDB00289	19550	58671	56021	61685	46666	55722	57830	53868	19848	34664	17576	45717	25640	59555	27435	52025	11863	40178	13713	47758
347	urea	Amino Acid	Urea cycle; Arginine and Proline Metabolism	1670	GC/MS	533	1223.9	171	57-13-6	1176	1143	C00086	HMDB00294	1130637	1171114	3097392	971521	805944	859681	1076404	404602	210919	1672365	2125511	1096154	2613268	950338	838482	928372	2084894	383288	291945	1389529
2660	uridine	Nucleotide	Pyrimidine Metabolism, Uracil containing	606	LC/MS Neg	535	1430	243.1	58-96-8	6029	5807	C00299	HMDB00296	155316	370826	158804	114479	192534	201419	136614	209491	147679	125298	157516	148733	130558	158993	164521	136476	92689	180753	94453	164322
2656	uridine monophosphate (5' or 3')	Nucleotide	Pyrimidine Metabolism, Uracil containing	39879	LC/MS Pos	100003366	1079	325	58-97-9	6030			HMDB00288	270116	476733	36501	207388	248796	245282	222641	130623	152604	116117	534028	14926	346723	27681	211643		339744	443500	348675	26036
1259	valerylcarnitine	Lipid	Fatty Acid Metabolism(Acyl Carnitine)	34406	LC/MS Pos	100001394	2584	246.2		6426903	4932322		HMDB13128	37986	101048	286335	200257	54088	115187	292794	26415	308582	101832	54408	80778	515639	60752	91607	50767	172321	47293	974891	71714
295	valine	Amino Acid	Leucine, Isoleucine and Valine Metabolism	1649	LC/MS Pos	566	1040	118.1	72-18-4	6287	6050	C00183	HMDB00883	3802028	4996391	5075926	4872141	5509810	7519312	4145127	4309964	2385149	7269210	5213239	6851977	7910767	7156913	4913534	9398027	10034314	5825687	5487502	4550771
787	VGAHAGEYGAEALER*	Peptide	Polypeptide	35211	LC/MS Pos	100001599	2542	765.8			21403180			217428	93703	392785	448569	23270	282173	690038	284184	67491	137999	15966	34646	13134	32646	22858	90230	15644	211104
2574	xanthine	Nucleotide	Purine Metabolism, (Hypo)Xanthine/Inosine containing	3147	LC/MS Pos	1004	1430	153.1	69-89-6	1188	1151	C00385	HMDB00292	772254	793151	793162	551036	937779	701764	436689	556200	625491	729290	988199	870283	977715	952514	847518	1292592	803503	612519	727819	432956
2576	xanthosine	Nucleotide	Purine Metabolism, (Hypo)Xanthine/Inosine containing	15136	LC/MS Pos	100000299	1785	285	146-80-5	64959	58484	C01762	HMDB00299		20129	28199							16085	31051	70936	49365	35979		91538	35347	16436	39620
862	xylitol	Carbohydrate	Pentose Metabolism	4966	GC/MS	543	1677.6	307.2	87-99-0	6912	6646	C00379	HMDB02917	14651	16940	14203	14018	13591	17506	8579	8641	9649	7477	22262	28437	30508	27789	18207	23538	22294	21720	21120	12853
860	xylonate	Carbohydrate	Pentose Metabolism	35638	GC/MS	100001627	1722	292	73686-31-7	6602431	5034782	C05411	HMDB60256	12454	19795	15862	6414	12611			7621	6468	3055	17489	15924	24135	13071	9465	14244	13291	12063	12114	16577

## Sheet: ScaledImpData (tissue)
													SAMPLE_NAME	SH-SJTU-04670	SH-SJTU-04671	SH-SJTU-04672	SH-SJTU-04673	SH-SJTU-04674	SH-SJTU-04675	SH-SJTU-04676	SH-SJTU-04677	SH-SJTU-04678	SH-SJTU-04679	SH-SJTU-04680	SH-SJTU-04681	SH-SJTU-04682	SH-SJTU-04683	SH-SJTU-04684	SH-SJTU-04685	SH-SJTU-04686	SH-SJTU-04687	SH-SJTU-04688	SH-SJTU-04689
													SAMPLE_ID	1000042670	1000042671	1000042672	1000042673	1000042674	1000042675	1000042676	1000042677	1000042678	1000042679	1000042680	1000042681	1000042682	1000042683	1000042684	1000042685	1000042686	1000042687	1000042688	1000042689
													CLIENT_IDENTIFIER	1	2	3	4	5	6	7	8	9	10	11	12	13	14	15	16	17	18	19	20
													SAMPLE_GROUP	healthy	healthy	healthy	healthy	healthy	healthy	healthy	healthy	healthy	healthy	cancer	cancer	cancer	cancer	cancer	cancer	cancer	cancer	cancer	cancer
													TUBE_LABEL	C29639N	C29648N	C29761N	C29788N	C29658N	C29773N	154N	C33256N	156N	158N	C29639T	C29648T	C29761T	C29788T	C29658T	C29773T	C33136T	C33256T	156T	158T
													SUBJECT_ID	C29639	C29648	C29761	C29788	C29658	C29773	154	C33256	156	158	C29639	C29648	C29761	C29788	C29658	C29773	C33136	C33256	156	158
PATHWAY ORDER	BIOCHEMICAL	SUPER_PATHWAY	SUB_PATHWAY	COMP_ID	PLATFORM	CHEMICAL_ID	RI	MASS	CAS	PUBCHEM	CHEMSPIDER	KEGG	Group HMDB_ID	Normal	Normal	Normal	Normal	Normal	Normal	Normal	Normal	Normal	Normal	Tumor	Tumor	Tumor	Tumor	Tumor	Tumor	Tumor	Tumor	Tumor	Tumor
1738	1,2-dipalmitoylglycerol	Lipid	Diacylglycerol	11953	GC/MS	850	2600	145	40290-32-2	99931	90288		HMDB07098	1.0293	1.0897	0.9462	0.4107	0.4107	0.9682	0.4107	1.1472	0.5915	1.4529	1.0647	0.4107	0.7722	1.9365	1.6605	0.4107	0.9707	1.0794	0.5312	0.8305
818	1,5-anhydroglucitol (1,5-AG)	Carbohydrate	Glycolysis, Gluconeogenesis, and Pyruvate Metabolism	20675	GC/MS	100000580	1788.7	217.1	154-58-5	64960		C07326	HMDB02712	0.6919	1.2209	0.4347	0.8533	1.0918	1.8961	1.2435	1.1006	0.9432	1.0544	1.0135	1.1338	0.3864	0.6927	0.9028	1.7608	0.981	0.9865	0.9431	1.4242
1700	1-(1-enyl-oleoyl)-GPE (P-18:1)*	Lipid	Lysoplasmalogen	44621	LC/MS Neg	100005372	6105.2	462.5						0.5738	1.666	1.2472	0.8247	1.2522	1.4302	0.7226	1.1902	1.1822	0.9978	0.3702	0.9442	1.7201	1.204	0.9057	0.4163	0.6455	1.0022	0.5822	1.1872
1698	1-(1-enyl-palmitoyl)-GPE (P-16:0)*	Lipid	Lysoplasmalogen	39270	LC/MS Neg	100003000	6153	436.4			10471193			0.6338	1.4766	1.2035	0.6456	1.3578	1.29	0.7779	0.7461	1.4017	0.7963	0.6953	1.0163	1.287	1.2192	1.178	0.552	1.0291	0.8387	0.9768	0.9837
1702	1-(1-enyl-stearoyl)-GPE (P-18:0)*	Lipid	Lysoplasmalogen	39271	LC/MS Neg	100003001	6500	464.4						0.7427	1.5103	1.062	1.0016	1.9287	0.9984	0.7923	0.6508	0.983	1.0974	0.7228	0.6222	1.1998	1.0031	1.1435	0.2392	0.415	0.7775	1.242	1.0786
1628	1-arachidonoyl-GPE (20:4)*	Lipid	Lysolipid	35186	LC/MS Neg	100001571	5731	500.3		42607465	21403171		HMDB11517	0.5998	1.4305	0.662	1.4215	1.5962	0.8979	0.7352	1.0427	1.2615	1.1645	1.4498	1.0994	0.389	0.7877	1.1068	1.2124	0.2898	0.9573	0.9253	0.9162
1649	1-arachidonoyl-GPI (20:4)*	Lipid	Lysolipid	34214	LC/MS Neg	100001654	5479	619.4					HMDB61690	0.8195	0.8843	0.6628	0.7486	1.0862	1.0334	0.7992	1.0136	0.4552	0.6091	1.4787	1.3789	1.6499	0.9864	1.0534	1.0835	0.6443	1.1994	1.0587	0.9522
1590	1-linoleoyl-GPC (18:2)	Lipid	Lysolipid	34419	LC/MS Pos	100001395	5574	520.4		11988421	10160888	C04100	HMDB10386	0.3852	0.2099	0.2099	0.2099	5.7967	0.3449	0.2099	0.2099	0.2099	1.2195	1.7117	1.147	0.2128	0.853	0.5309	0.2099	2.4046	0.2099	2.2802	0.2099
1624	1-linoleoyl-GPE (18:2)*	Lipid	Lysolipid	32635	LC/MS Neg	100001570	5725	476.3		52925130	21403170		HMDB11507	0.9586	2.1548	0.865	1.9738	2.8651	0.8805	1.0095	0.8039	1.3983	2.3442	1.1525	0.5712	0.7838	0.9905	1.8975	0.6681	0.687	1.6908	2.6655	0.5276
69	1-methylhistamine	Amino Acid	Histidine Metabolism	32441	GC/MS	100001204	1725	174.1	501-75-7	3614	3488	C05127	HMDB00898	0.9766	1.5743	0.6015	0.7454	1.5929	1.5719	0.5299	1.439	0.8812	1.0629	1.935	1.1306	0.7033	0.9323	0.8432	1.0234	1.1253	1.6923	0.681	0.4739
73	1-methylimidazoleacetate	Amino Acid	Histidine Metabolism	32350	LC/MS Pos	100001208	845	141.1	2625-49-2	75810	68319	C05828	HMDB02820	0.9793	1.0551	0.9928	0.9335	1.5583	1.8749	1.0072	1.1165	0.7062	0.5739	1.036	0.8256	0.5237	0.8317	1.5112	0.605	0.5237	1.1327	0.5237	2.5738
1587	1-oleoyl-GPC (18:1)	Lipid	Lysolipid	33960	LC/MS Neg	100001272	6120	596	19420-56-5	16081932	17240641		HMDB02815	0.9027	2.2648	1.1397	1.0224	1.4309	1.0671	0.8491	1.3195	0.9776	0.8071	0.833	0.3828	1.7593	1.0285	1.2427	0.5481	0.6897	1.4596	0.8279	0.4775
1620	1-oleoyl-GPE (18:1)	Lipid	Lysolipid	35628	LC/MS Neg	100001569	5928	478.3	89576-29-4	9547071	7826021		HMDB11506	0.9274	1.8464	1.6683	1.058	1.8521	0.9628	0.8571	1.0169	2.076	1.0571	0.6257	0.4933	1.7931	0.9831	1.2749	0.388	0.7749	1.2586	0.8995	0.5766
1643	1-oleoyl-GPI (18:1)*	Lipid	Lysolipid	36602	LC/MS Neg	100001777	5577	597.4						0.9174	1.305	0.7148	0.9661	0.7925	0.9923	0.7598	1.1986	0.7514	1.0077	0.99	0.875	2.1407	2.0559	1.936	1.0362	1.2971	2.1435	1.6448	0.4887
1652	1-oleoyl-GPS (18:1)	Lipid	Lysolipid	19260	LC/MS Neg	100000630	5607	522.3		9547099	7826049			0.8394	1.1566	0.9418	0.9145	1.3832	1.2198	0.8431	0.8922	0.8996	0.956	0.9207	0.7511	1.4956	1.8291	1.4394	1.6232	1.044	1.6452	2.8291	0.9109
1581	1-palmitoleoyl-GPC (16:1)*	Lipid	Lysolipid	33230	LC/MS Pos	100001511	5524	494.3		24779461	21403152		HMDB10383	0.7892	0.5953	0.5953	0.5953	0.762	0.5953	0.5953	0.5953	0.5953	1.0137	1.7859	1.4937	0.8431	1	0.6758	0.5953	2.2231	0.5953	1.386	0.5953
1579	1-palmitoyl-GPC (16:0)	Lipid	Lysolipid	33955	LC/MS Neg	100001263	6046	570	17364-16-8	86554	78064		HMDB10382	1.123	2.3306	1.6641	0.9665	1.5242	1.0095	0.8693	1.3184	1.0006	0.7733	0.9994	0.3319	1.466	0.6137	1.3527	0.3605	0.5808	1.2927	0.5352	0.802
1615	1-palmitoyl-GPE (16:0)	Lipid	Lysolipid	35631	LC/MS Neg	100001567	5940	452.3		9547069	7826019		HMDB11503	1.2179	2.2456	1.0752	0.843	1.7575	1.4375	0.6488	0.7973	1.3866	1.2217	0.5928	0.3314	1.3685	0.675	1.4329	0.1848	1.1277	0.8149	0.5171	0.9248
1662	1-palmitoyl-GPG (16:0)*	Lipid	Lysolipid	45970	LC/MS Neg	100005717	5549.7	483.4		3300276	2548639			1.4416	1.8947	2.0923	0.7475	1.0691	0.7667	1.0182	0.7867	0.7636	0.9818	1.1615	0.2858	1.8933	2.1854	1.2228	0.4988	0.7668	0.7178	1.4339	0.6521
1638	1-palmitoyl-GPI (16:0)*	Lipid	Lysolipid	35305	LC/MS Neg	100001655	5573	571.3					HMDB61695	1.307	1.1862	1.1143	0.5179	1.3412	1.1981	0.8739	0.5389	0.4375	0.5243	0.895	0.3605	2.0756	1.105	1.4865	0.7003	1.8282	0.8652	2.2506	0.5754
1585	1-stearoyl-GPC (18:0)	Lipid	Lysolipid	33961	LC/MS Pos	100001271	5844	524.4	19420-57-6	497299	435389		HMDB10384	0.6069	0.044	0.0423	0.4221	4.0325	0.4416	0.0992	0.0423	0.0423	1.0122	3.7897	1.9727	1	3.0827	2.1816	0.1387	3.5302	0.0423	3.7918	0.1533
1618	1-stearoyl-GPE (18:0)	Lipid	Lysolipid	34416	LC/MS Pos	100001461	5842	482.3	69747-55-3	9547068	7826018		HMDB11130	0.3464	0.0949	0.0949	0.302	2.514	0.2729	0.0949	0.0949	0.0949	0.743	1.046	1.0539	0.954	2.1961	1.1779	0.1005	1.9425	0.0949	1.8749	0.0949
1665	1-stearoyl-GPG (18:0)	Lipid	Lysolipid	34437	LC/MS Neg	100001462	5826	511.4			21403138			0.3979	1.7743	1.7213	0.892	0.8388	0.3979	0.6236	0.5612	1.0492	1.3099	0.3979	0.3979	0.5489	4.7024	1.0931	0.8514	0.3979	1	1.2221	0.3979
1641	1-stearoyl-GPI (18:0)	Lipid	Lysolipid	19324	LC/MS Neg	100000656	5800	599.4	796963-93-4		21403067		HMDB61696	0.6705	1.1809	0.9904	0.8557	1.6255	0.7486	0.781	1.0096	0.7597	0.6971	1.1677	0.6451	2.2862	3.2819	1.3143	1.7974	0.8535	1.8327	2.0061	0.5682
1651	1-stearoyl-GPS (18:0)*	Lipid	Lysolipid	45966	LC/MS Neg	100004327	5798.7	524.4		9547101	7826051			0.6309	1.3513	0.5467	1.0526	1.774	1.0007	0.3494	0.6124	0.9993	1.2486	0.6642	0.8716	1.2917	2.5899	1.1423	0.8116	1.1753	0.7834	1.2313	0.6651
1047	10-heptadecenoate (17:1n7)	Lipid	Long Chain Fatty Acid	33971	LC/MS Neg	100001278	5558	267.3	29743-97-3	5312435	4471860		HMDB60038	1.0045	1.1041	0.6374	0.8495	1.0075	0.8651	0.8839	1.2049	0.9955	1.2235	0.9864	0.5337	1.3723	1.0314	1.0942	0.7887	1.1181	1.2513	0.857	0.4054
1057	10-nonadecenoate (19:1n9)	Lipid	Long Chain Fatty Acid	33972	LC/MS Neg	100001277	5775	295.4	73033-09-7	5312513	4471938		HMDB13622	0.6623	1.0907	0.9542	0.9852	1.1302	0.72	1.0148	1.3318	1.0283	1.0164	0.9048	0.6973	1.8829	1.6661	1.1484	0.958	0.7373	1.374	0.6865	0.4153
1317	13-HODE + 9-HODE	Lipid	Fatty Acid, Monohydroxy	37752	LC/MS Neg	100002196	5270	295.2		43013				1.3523	1.9651	0.4642	1.813	3.7801	1.1476	0.3716	1.061	0.9655	1.2845	1.6125	0.56	0.4717	0.8431	2.4618	0.8176	0.4038	1.0345	0.4659	0.5337
1142	13-methylmyristate	Lipid	Fatty Acid, Branched	38293	GC/MS	100002344	1833	299.2	2485-71-4	151014	133106			1.3223	1.5176	0.8968	0.9436	0.6092	1.0154	0.9846	0.6092	0.8284	0.6092	0.6092	1.4769	1.8034	1.1203	0.6092	1.2233	0.6844	0.6092	0.8029	0.6092
1402	15-HETE	Lipid	Eicosanoid	37538	LC/MS Neg	100000565	5271	319.3	54845-95-3	5280724	4444307	C04742	HMDB02110	0.7861	1.0713	0.6736	1.8184	1.579	0.7759	0.4658	0.2168	0.1845	0.9287	1.5138	1.6078	1.2699	0.7384	1.3639	1.4898	0.4067	1.0871	0.2881	1.2845
1145	15-methylpalmitate	Lipid	Fatty Acid, Branched	38768	LC/MS Neg	100002945	5698	269.4		17903417				1.466	1.2074	1.0297	0.76	0.7371	1.0017	0.9297	1.113	0.8511	0.9253	0.9983	1.0811	1.9414	0.8319	0.8385	0.9563	1.2488	1.3425	0.9766	1.0569
84	2-aminoadipate	Amino Acid	Lysine Metabolism	6146	LC/MS Pos	381	794	162.1	542-32-5;1118-90-7	469	456	C00956	HMDB00510	0.5261	1.3045	0.7836	0.7744	0.9382	1.0618	0.5417	0.8518	2.1743	0.5271	0.587	4.7063	0.7714	1.6297	1.2625	1.798	1.2471	1.3947	0.6423	3.0707
326	2-aminobutyrate	Amino Acid	Methionine, Cysteine, SAM and Taurine Metabolism	1577	GC/MS	1128	1215.7	130	1492-24-6	439691	388757	C02261	HMDB00650	0.8352	0.9976	1.4658	0.8303	1.0024	1.7906	0.8998	0.8453	0.3935	0.7467	1.3984	1.085	2.7335	1.2235	0.8617	1.4914	1.2346	1.3197	0.8258	0.9321
327	2-hydroxybutyrate (AHB)	Amino Acid	Methionine, Cysteine, SAM and Taurine Metabolism	21044	GC/MS	100000933	1169.4	131	3347-90-8	440864	389701	C05984	HMDB00008	0.5472	0.998	1.2465	1.528	0.8775	2.1087	1.0804	0.804	0.4022	0.9575	0.9789	1.1401	1.7532	1.4956	0.7482	2.1696	1.3191	0.7291	0.6552	1.002
1159	2-hydroxyglutarate	Lipid	Fatty Acid, Dicarboxylate	37253	GC/MS	100002070	1576	247	40951-21-1	43	42	C02630	HMDB00606	0.5055	0.6021	0.8052	0.787	0.9958	0.8271	0.6679	0.5638	0.5555	0.5287	1.1663	1.7982	1.7049	1.1553	1.7083	1.4609	1.5092	1.0042	1.3218	3.248
1292	2-hydroxypalmitate	Lipid	Fatty Acid, Monohydroxy	35675	LC/MS Neg	100001579	5508	271.3	764-67-0	92836	83805		HMDB31057	0.6634	1.117	0.9762	1.3952	1.0429	1.6533	1.0824	0.8152	0.7309	0.9273	0.9736	1.3886	1.3415	2.0127	0.9315	1.0238	0.8393	0.9024	0.8615	1.4184
1293	2-hydroxystearate	Lipid	Fatty Acid, Monohydroxy	17945	LC/MS Neg	1239	5705	299.4	629-22-1	69417	62625	C03045		0.7864	1.2108	0.8183	1.1371	1.4072	1.8354	0.9745	0.6915	0.8037	0.691	1.2719	1.462	1.0528	0.8995	0.8148	0.738	0.718	1.0255	1.4825	1.7501
287	2-methylbutyrylcarnitine (C5)	Amino Acid	Leucine, Isoleucine and Valine Metabolism	35431	LC/MS Pos	100001509	2439	246.1	31023-25-3	6426901	4932320		HMDB00378	0.8097	0.6944	1.0721	1.0921	3.2376	4.895	1.675	0.243	0.8637	0.837	0.2714	0.7291	3.658	0.9279	2.5938	1.598	1.3105	0.5038	1.3661	0.8528
1582	2-palmitoleoyl-GPC (16:1)*	Lipid	Lysolipid	35819	LC/MS Pos	100001561	5482	494.3			21403164			0.2228	0.2228	0.2228	0.2228	0.8387	0.2228	0.2228	0.2228	0.2228	0.3196	1.1613	1.6473	1.7036	2.3554	0.7198	0.5584	6.9905	0.2311	1.8251	0.2228
1580	2-palmitoyl-GPC (16:0)*	Lipid	Lysolipid	35253	LC/MS Neg	100001562	5945	570.3		15061532	21403165		HMDB61702	1.0038	1.6191	1.6592	0.8382	1.2864	1.2927	1.0404	1.0416	0.9962	0.5939	0.7582	0.5769	1.5525	0.5362	1.1167	0.5651	0.6166	1.014	0.462	0.9376
1715	2-palmitoylglycerol (16:0)	Lipid	Monoacylglycerol	33419	GC/MS	100001048	2108	129	23470-00-0	123409	110006		HMDB11533	0.9806	0.593	1.0244	0.7501	0.7014	1.3785	0.593	0.8465	1.2299	1.0194	0.593	0.7896	1.4387	1.2785	1.1495	1.1125	1.3511	0.9727	0.9559	0.8151
834	2-phosphoglycerate	Carbohydrate	Glycolysis, Gluconeogenesis, and Pyruvate Metabolism	35629	GC/MS	100000093	1734	459.1	70195-25-4	59	13766841	C00631	HMDB03391	0.3395	0.3395	0.8892	0.3395	0.3395	1.9157	0.3395	0.7999	0.3395	0.9602	2.9614	2.2375	0.3395	0.4342	0.3395	1.9902	1.0398	0.3395	1.9846	0.3978
2906	2-piperidinone	Xenobiotics	Food Component/Plant	43400	LC/MS Pos	100004295	2034	100.1	675-20-7	12665	12144			0.5316	0.604	15.4418	7.1668	0.8588	2.7883	0.5736	1.0053	0.9947	2.4204	0.7438	0.4054	11.7392	1.4821	0.6078	2.4719	2.2609	0.5909	1.1762	0.8156
1586	2-stearoyl-GPC (18:0)*	Lipid	Lysolipid	35255	LC/MS Pos	100001555	5780	524.4		10208382	8383879			0.3473	0.3473	0.3473	0.5046	1.1326	0.3473	0.3473	0.3473	0.3473	0.3473	1	0.3473	0.4231	1.0252	0.6901	0.3473	1.0386	0.3473	1.351	0.3473
129	3-(4-hydroxyphenyl)lactate	Amino Acid	Phenylalanine and Tyrosine Metabolism	32197	LC/MS Neg	240	1395	181.1	6482-98-0	9378	9010	C03672	HMDB00755	0.7039	0.7039	0.8169	0.7039	1.1365	0.9586	0.7405	0.7039	0.7039	0.8541	1	1.2752	1.3849	1.2274	0.9783	1.5031	1.1895	0.7039	1.8061	0.9488
181	3-(4-hydroxyphenyl)propionate	Amino Acid	Phenylalanine and Tyrosine Metabolism	39587	LC/MS Neg	100002914	1658	165.1	501-97-3	10394	9965	C01744	HMDB02199	0.0615	0.0615	1.7887	0.0615	0.0615	0.0615	0.0615	0.0615	0.0615	0.0615	0.0615	0.0615	2.6492	0.0615	0.0615	0.0615	0.0615	0.0615	0.2113	0.0615
2706	3-aminoisobutyrate	Nucleotide	Pyrimidine Metabolism, Thymine containing	1566	GC/MS	1114	1252.2	102	10569-72-9;214139-20-5	64956	58481	C05145	HMDB03911	0.6341	1.2135	0.7196	1.0962	0.6957	1.7121	1.5844	0.8706	0.5635	0.5785	1.0451	1.6699	1.1275	0.9374	0.6968	1.7056	0.9549	1.3658	0.6764	1.4509
1285	3-hydroxybutyrate (BHBA)	Lipid	Ketone Bodies	542	GC/MS	254	1203.5	116.9	625-72-9	441	428	C01089	HMDB00357	0.1081	0.6489	1.0846	2.0364	0.0867	0.9113	1.0083	1.1443	1.1937	0.3545	0.1812	0.9917	1.053	1.6744	0.1284	1.0494	0.3424	1.265	1.7626	0.9013
1257	3-hydroxybutyrylcarnitine (1)	Lipid	Fatty Acid Metabolism(Acyl Carnitine)	43264	LC/MS Pos	100003926	1475	248.2		53481617			HMDB13127	0.2739	0.7441	1.3505	1.6553	0.2625	1.1829	0.6173	0.9513	1.0487	0.2666	0.5167	1.728	2.7683	1.6952	0.3688	1.5925	0.7484	1.6302	3.1678	0.7749
286	3-methyl-2-oxovalerate	Amino Acid	Leucine, Isoleucine and Valine Metabolism	15676	LC/MS Neg	100000036	2106	129.2	1460-34-0;51829-07-3	47	46	C00671	HMDB03736	0.8386	0.8386	0.8386	1.8814	0.8575	2.0539	0.8386	0.8386	0.8386	1.5938	0.8386	0.8386	1.2565	0.9981	1.0019	0.8386	0.8386	0.9183	0.8443	0.8386
183	3-phenylpropionate (hydrocinnamate)	Amino Acid	Phenylalanine and Tyrosine Metabolism	15749	LC/MS Neg	100000010	2830	149.1	501-52-0	107	10181339	C05629	HMDB00764	0.4622	0.4622	10.8203	0.4622	0.4622	0.4622	0.4622	0.4622	0.4864	0.4622	0.4622	0.4622	5.8718	0.4622	0.4622	0.4622	0.4622	0.4622	1	0.4622
835	3-phosphoglycerate	Carbohydrate	Glycolysis, Gluconeogenesis, and Pyruvate Metabolism	40264	GC/MS	132	1754	357.1	80731-10-8	724	10669764	C00597	HMDB00807	0.672	0.1029	0.5685	1.8671	0.6069	1.948	0.9679	0.8866	0.8173	1.48	3.5028	2.9323	0.1759	1.1365	0.5272	1.7165	1.0321	0.3485	1.9956	1.4185
393	4-acetamidobutanoate	Amino Acid	Polyamine Metabolism	1558	LC/MS Pos	1113	1724	146.1	3025-96-5	18189	17180	C02946	HMDB03681	0.6603	1.1745	1.3563	0.6093	1.0728	1.3195	1.17	1.431	0.7474	0.8703	1.7228	1.111	1.8438	0.654	0.8219	0.907	0.8513	0.6663	1.6562	0.9272
1910	4-androsten-3beta,17beta-diol disulfate (1)*	Lipid	Steroid	37202	LC/MS Neg	100001992	3735	224.3		10634		C04295	HMDB03818	0.3359	1.5403	1.2112	3.5823	0.3359	0.4252	2.5868	0.7571	0.4869	0.3359	0.3359	1.1857	0.5472	2.1278	0.3359	0.3359	0.3359	0.8143	0.675	2.3079
398	4-guanidinobutanoate	Amino Acid	Guanidino and Acetamido Metabolism	15681	LC/MS Pos	100000096	1085	146.1	463-003;463-00-3	500	486	C01035	HMDB03464	0.4736	0.8983	1.6182	0.4736	0.9946	1.4749	0.8669	0.6595	0.4736	0.4736	1.2625	0.9202	0.4736	1.3862	1	1.1028	0.7745	0.4736	1.1029	1.2721
412	4-hydroxy-nonenal-glutathione	Amino Acid	Glutathione Metabolism	48504	LC/MS Pos	100006240	3844	464.206	99927-70-5					0.6428	1.9032	0.6103	0.5931	2.3051	1.087	0.5931	0.5931	0.913	0.6358	1.9178	1.2825	0.6496	0.5931	1.0914	0.7408	0.5931	1.1953	0.8619	1.092
1287	4-hydroxybutyrate (GHB)	Lipid	Fatty Acid, Monohydroxy	34585	GC/MS	100001507	1277	233.1	502-85-2	10413	9984	C00989	HMDB00710	1.3562	0.2945	1.2272	0.8225	0.4969	0.9641	0.7888	0.6464	0.3787	1.4304	2.935	0.9899	2.2203	0.7107	1.0101	1.0424	3.2029	1.1529	1.1904	0.6981
114	4-hydroxyphenylacetate	Amino Acid	Phenylalanine and Tyrosine Metabolism	541	GC/MS	144	1630.6	179	156-38-7	127	3881560	C00642	HMDB00020	0.9777	0.5546	1.5843	1.2164	0.5546	0.9452	0.8081	0.5675	1.8793	2.7052	0.5546	1	1.908	0.9892	0.5546	0.7705	2.061	0.5546	2.8822	0.5546
257	4-methyl-2-oxopentanoate	Amino Acid	Leucine, Isoleucine and Valine Metabolism	22116	LC/MS Neg	100000551	2200	129.2	816-66-0	70	69	C00233	HMDB00695	0.4155	0.7706	0.4155	1.6666	0.5677	2.2798	0.4155	0.5662	0.4155	1.6287	0.4155	1.3926	0.9578	0.708	0.7914	1.1562	1.0422	1.1019	0.4155	0.4155
2670	5,6-dihydrouracil	Nucleotide	Pyrimidine Metabolism, Uracil containing	1559	GC/MS	1125	1505.2	243	504-07-4	649	629	C00429	HMDB00076	0.553	1.8871	1.1468	0.8503	1.1692	1.286	1.0193	0.8016	0.6165	1.3403	0.8514	1.923	1.2365	1.8335	0.9712	2.7455	0.813	0.8779	0.7741	0.9807
98	5-aminovalerate	Amino Acid	Lysine Metabolism	18319	LC/MS Pos	100000454	860	118.1	660-88-8	138	135	C00431	HMDB03355	1.664	2.1294	6.3667	0.6021	1.0966	2.9333	0.2275	0.3086	0.9034	1.6986	0.8057	0.8162	12.1946	1.7394	0.4505	0.6104	5.6419	0.3065	1.0966	0.0682
233	5-hydroxyindoleacetate	Amino Acid	Tryptophan Metabolism	437	LC/MS Pos	71	2549	192.1	54-16-0	1826	1760	C05635	HMDB00763	1.3217	1.3164	0.8709	1.1382	1.7189	1	0.4221	0.6341	1.293	1.4692	0.8361	0.4221	0.4221	0.4221	0.5007	0.4221	0.4221	0.4221	0.4221	0.505
232	5-hydroxytryptophol	Amino Acid	Tryptophan Metabolism	41498	LC/MS Pos	100002534	2480.5	178.1	154-02-9	9061	8708		HMDB01855	1.503	2.0714	0.8147	0.708	2.6022	3.0751	1.5603	1.7606	2.2451	1.1853	0.2076	0.0899	0.0899	0.0899	0.6505	0.1135	0.0899	0.4476	0.0899	0.1753
389	5-methylthioadenosine (MTA)	Amino Acid	Polyamine Metabolism	1419	LC/MS Pos	212	2427	298.1	2457-80-9	439176	388321	C00170	HMDB01173	1.0078	0.9922	0.525	0.8634	0.8375	1.3355	0.7477	0.6798	0.655	0.635	2.9491	1.8865	2.6789	0.9882	1.087	3.3857	2.4145	2.1701	3.8976	0.7201
408	5-oxoproline	Amino Acid	Glutathione Metabolism	1494	LC/MS Neg	1021	744	128.2	98-79-3	7405	7127	C01879	HMDB00267	0.8212	1.2106	0.8246	0.7095	1.0456	1.2985	0.5333	0.7755	0.8664	0.7645	1.089	1.5897	1.6257	1.0334	0.9415	1.2603	0.8775	0.9666	1.0378	1.2938
844	6-phosphogluconate	Carbohydrate	Pentose Phosphate Pathway	15442	LC/MS Neg	100000341	588	275.1	921-62-0;53411-70-4	91493	82615	C00345	HMDB01316	0.9975	1.1161	0.7427	1.0726	0.7654	1.0014	0.696	0.805	1.0953	0.6564	2.4698	0.9986	1.27	0.5617	1.2364	0.898	0.646	1.5517	1.5433	1.608
1813	7-alpha-hydroxy-3-oxo-4-cholestenoate (7-Hoca)	Lipid	Sterol	36776	LC/MS Neg	100001609	5268	429.4	115538-85-7	3081085	2338765	C17337	HMDB12458	0.7693	1.1786	1.0556	0.8726	1.4087	2.4786	0.8576	1.1886	1	1.69	0.6918	0.9002	0.616	1.1324	0.7113	1.9065	1.9144	0.6235	0.616	0.875
2017	7-ketodeoxycholate	Lipid	Secondary Bile Acid Metabolism	31904	LC/MS Neg	100001063	4840	405.4	911-40-0	188292	163659		HMDB00391	0.8677	0.8677	0.8677	0.8677	2.7942	0.8677	0.8677	0.8677	0.8677	0.8677	0.8677	0.8677	0.8677	0.8677	0.9088	0.8677	1.1578	0.8677	1	0.8677
790	Ac-Ser-Asp-Lys-Pro-OH	Peptide	Polypeptide	40707	LC/MS Pos	100003761	1767	488.2	127103-11-1	4409396	3610210			0.6865	1.1565	0.7929	0.6865	1.1417	1.4441	0.7395	0.9498	0.7769	0.6915	0.8155	0.7827	3.3413	0.6865	1.0182	1.4649	1	1.1746	1.8049	0.6865
1256	acetylcarnitine	Lipid	Fatty Acid Metabolism(Acyl Carnitine)	32198	LC/MS Pos	100000802	1203	204.2	5080-50-2	1	5406074	C02571	HMDB00201	0.5928	0.9641	0.8969	1.0697	0.6762	0.8743	0.8233	0.744	1.0359	0.5995	0.9387	1.6562	1.1271	1.0735	0.8562	1.3004	1.4728	1.0476	1.3522	1.4012
1286	acetylcholine	Lipid	Neurotransmitter	18790	LC/MS Pos	1749	866	146.1	60-32-1					0.9009	1.2735	1.119	1.0613	1.6544	0.7571	1.2436	1.3296	0.9651	1.0349	1.2034	1.2299	0.4473	0.3326	0.4693	0.5836	0.1741	0.6408	0.1857	3.2748
2595	adenine	Nucleotide	Purine Metabolism, Adenine containing	554	LC/MS Pos	880	1003	136.1	73-24-5	190	185	C00147	HMDB00034	0.707	0.664	0.3987	1.0857	0.8218	0.6965	0.5794	0.3987	0.4659	0.3987	1.7175	2.57	3.2493	0.3987	1	1.0567	0.9082	2.9191	3.2194	1.821
2594	adenosine	Nucleotide	Purine Metabolism, Adenine containing	555	LC/MS Pos	798	1650	268.1	58-61-7	60961	54923	C00212	HMDB00050	0.991	2.6162	0.9389	1.0374	1.3149	1.1622	0.8783	1.6801	1.8375	0.7959	0.6532	0.4493	1.1895	0.1655	1.7267	0.3115	0.9966	1.8837	1.0034	0.6747
2589	adenosine 2'-monophosphate (2'-AMP)	Nucleotide	Purine Metabolism, Adenine containing	36815	LC/MS Pos	100001694	1625	348.1	130-49-4	94136		C00946	HMDB11617	1.1237	1.9702	0.5744	0.677	2.1609	0.5979	0.9515	0.5939	0.4689	0.5173	2.4306	0.4689	2.8573	0.4689	1.2801	0.9138	1.3205	1.0406	0.9594	1.18
2588	adenosine 3'-monophosphate (3'-AMP)	Nucleotide	Purine Metabolism, Adenine containing	35142	LC/MS Pos	100001449	1451	348.1	84-21-9	41211	10463793	C01367	HMDB03540	1.6416	2.7352	0.7562	1.5404	2.2105	1.3642	1.3029	0.7389	0.1577	0.9315	1.8826	0.2674	1.1556	0.382	0.7613	0.4282	1.0685	1.3291	0.1457	0.3235
2586	adenosine 5'-diphosphate (ADP)	Nucleotide	Purine Metabolism, Adenine containing	3108	LC/MS Neg	208	700	426.1	20398-34-9	6022	5800	C00008	HMDB01341	0.5597	0.3461	0.3461	0.5355	0.831	1	0.4033	0.4613	1.0674	0.3786	2.2355	1.0572	1.2613	0.5599	1.3991	0.9058	2.4554	1.0311	1.1627	1.0247
2733	adenosine 5'-diphosphoribose (ADP-ribose)	Cofactors and Vitamins	Nicotinate and Nicotinamide Metabolism	558	LC/MS Neg	215	964	558.1	68414-18-6	192	3674071	C00301	HMDB01178	1.4716	0.3236	0.6491	1.2499	1.6993	1.0373	1.4188	0.741	1	1.6704	3.1757	0.714	0.3236	0.458	1.7447	0.5175	0.9022	0.6576	1.5426	0.8297
2587	adenosine 5'-monophosphate (AMP)	Nucleotide	Purine Metabolism, Adenine containing	32342	LC/MS Pos	209	1210	348.1	149022-20-8	6083	10239183	C00020	HMDB00045	1.2638	1.362	0.2095	1.3013	1.1796	0.7968	0.8204	0.4195	0.7134	0.7674	3.5063	0.0817	2.1886	0.0883	1.3226	0.0644	2.1844	2.0993	2.4229	0.2196
2591	adenosine-2',3'-cyclic monophosphate	Nucleotide	Purine Metabolism, Adenine containing	37467	LC/MS Pos	72	1484	330.2	37063-35-7	2024	1947	C02353	HMDB11616	0.3651	1	0.5914	0.3651	0.3651	0.3651	0.3651	0.3651	0.3651	0.3651	0.3651	0.3651	0.3651	0.3651	0.3651	0.3651	0.3651	1.5657	0.3651	3.1324
2593	adenylosuccinate	Nucleotide	Purine Metabolism, Adenine containing	18360	LC/MS Neg	1303	569	462.1	19046-78-7	195	190	C03794	HMDB00536	0.751	0.3957	0.3895	0.3895	0.4613	0.3895	0.3895	0.3895	0.3895	0.3895	2.4841	0.3895	2.2571	0.3895	0.6433	0.3895	1.249	1.4033	1.329	0.3895
1089	adrenate (22:4n6)	Lipid	Polyunsaturated Fatty Acid (n3 and n6)	32980	LC/MS Neg	100001193	5684	331.3	2091-25-0	5497181	4445971	C16527	HMDB02226	0.7759	1.0475	0.8791	0.983	1.0089	0.9407	0.927	1.01	0.8865	1.2638	0.9578	1.1268	1.0211	1.8845	1.2435	1.4148	0.9282	0.9057	1.0288	0.9911
25	alanine	Amino Acid	Alanine and Aspartate Metabolism	1126	GC/MS	811	1147.6	115.9	56-41-7	5950	5735	C00041	HMDB00161	0.9208	0.9291	1.1016	0.8106	1.0981	1.0358	0.7508	0.8829	0.595	0.9454	1.4943	1.3846	1.9636	0.9642	0.9468	1.1084	1.5317	1.2418	1.4821	0.5496
446	alanylleucine	Peptide	Dipeptide	37093	LC/MS Pos	100001890	2150	203	1638-60-4	259583	227831		HMDB28691	0.5578	11.7058	2.7755	0.462	0.4534	0.5288	0.8917	1.7442	0.927	1	0.9718	0.5122	1.0549	1.005	0.4534	0.4534	1.0556	5.8349	0.4534	1.349
284	allo-isoleucine	Amino Acid	Leucine, Isoleucine and Valine Metabolism	46552	GC/MS	100005840	1325	158.1		6950182;99288	89698			0.5031	0.987	1.013	0.9414	0.9196	1.8309	1.1004	1.0346	0.4424	0.7699	0.891	0.8794	1.6641	1.2965	0.568	1.2026	1.1864	1.4163	0.8629	1.2722
273	alpha-hydroxyisovalerate	Amino Acid	Leucine, Isoleucine and Valine Metabolism	33937	GC/MS	100001300	1208	145.1	600-37-3	99823	90190		HMDB00407	0.5473	0.6427	1.0685	1.0552	0.5728	1.5734	2.6877	1.1722	0.3368	1.423	0.9152	0.5518	1.9811	0.8655	0.8211	1.7357	2.3512	0.9448	0.6696	2.1782
2752	alpha-tocopherol	Cofactors and Vitamins	Tocopherol Metabolism	1561	GC/MS	1105	2305.4	502.5	59-02-9;10191-41-0	14985	14265	C02477	HMDB01893	0.4936	0.7096	0.9487	2.0078	0.8026	0.6111	0.8627	2.3148	2.0848	3.2459	0.9058	0.7083	1.0513	8.9248	0.9123	1.0699	3.4371	1.42	0.8718	1.7692
863	arabinose	Carbohydrate	Pentose Metabolism	575	GC/MS	828	1631.6	217	28697-53-2	66308	59687	C00216	HMDB00646	0.8819	0.5825	1.0595	1.0418	0.411	1.1016	1.0529	1.4179	0.5765	1.2393	2.2319	0.7761	1.1076	0.6678	0.8716	0.6046	0.8997	1.4305	1.9848	0.9582
868	arabitol	Carbohydrate	Pentose Metabolism	38075	GC/MS	100000012	1687.5	307.1	7643-75-6	94154	84971	C01904	HMDB00568	0.803	1.3782	1.8971	1.2028	0.7927	1.1637	0.9398	0.8237	0.3334	0.8424	1.3416	1.5066	1.4666	1.0056	1.3395	0.8438	0.8689	0.8108	0.9944	1.2458
2749	arabonate	Cofactors and Vitamins	Ascorbate and Aldarate Metabolism	37516	GC/MS	100001937	1736	292.1	7643-75-7	122045	108861	C00878	HMDB00539	0.4937	1.6206	0.6836	1.2317	1.3305	1.3931	0.8586	1.1254	0.3025	0.8746	3.05	1.4167	0.3278	0.4764	1.3806	0.6788	0.601	0.4138	1.3995	1.3367
1059	arachidate (20:0)	Lipid	Long Chain Fatty Acid	44679	LC/MS Neg	893	6282	311.3	506-30-9	10467	10035	C06425	HMDB02212	1.0665	1.0004	0.9996	0.7902	1.0029	1.1726	1.1533	0.9315	0.9645	0.7895	0.9971	0.7894	1.1919	1.9374	1.0275	0.8323	0.7798	1.0588	1.1004	0.8591
1088	arachidonate (20:4n6)	Lipid	Polyunsaturated Fatty Acid (n3 and n6)	1110	LC/MS Neg	229	5525	303.4	506-32-1	444899	392692	C00219	HMDB01043	0.8179	1.5032	1.1646	0.8415	1.4237	0.9504	0.9252	0.9183	0.894	1.1872	0.9367	1.0744	1.1887	1.5858	1.0496	0.8644	0.7292	0.9256	1.3814	1.1915
346	arginine	Amino Acid	Urea cycle; Arginine and Proline Metabolism	1638	LC/MS Pos	231	650	175.2	1119-34-2	232	227	C00062	HMDB00517	0.8604	1.0194	1.0072	0.9928	1.052	1.2849	1.0478	1.0526	0.865	1.0731	0.6546	1.1149	0.8111	1.0357	0.7701	1.1427	0.8529	0.8988	0.8428	0.913
2746	ascorbate (Vitamin C)	Cofactors and Vitamins	Ascorbate and Aldarate Metabolism	1640	GC/MS	233	1850.1	332.1	134-03-2		10189562	C00072	HMDB00044	0.1225	2.874	1.0947	0.2273	1.0264	0.5746	0.0279	0.9913	0.4005	0.7806	1.6425	0.8651	1.0731	0.7037	1.9549	0.7529	2.2353	1.3917	1.0087	1.1285
30	asparagine	Amino Acid	Alanine and Aspartate Metabolism	11398	GC/MS	917	1651.2	231	70-47-3	6267	6031	C00152	HMDB00168	0.5838	1.0383	0.7929	0.547	0.8426	1.0985	0.377	0.5374	0.444	0.5636	1.1498	2.2907	0.7832	1.3664	1.0436	1.8249	1.4622	1.1443	1.5575	0.9617
28	aspartate	Amino Acid	Alanine and Aspartate Metabolism	15996	GC/MS	234	1529.7	232	56-84-8	5960	5745	C00049	HMDB00191	0.856	0.9349	1.1392	0.7312	0.9017	1.5365	0.6408	1.2009	0.6848	0.9598	1.3845	1.3189	1.7894	1.0009	0.9047	0.9484	1.5176	2.8606	1.2036	0.9991
2677	beta-alanine	Nucleotide	Pyrimidine Metabolism, Uracil containing	55	GC/MS	244	1451.8	174	56-41-7;107-95-9	239	234	C00099	HMDB00056	0.4724	0.7355	0.9339	0.5455	1.0661	0.3483	0.2839	0.4758	0.3331	0.6836	1.0681	1.3406	2.9653	2.6387	1.409	1.2905	1.9904	1.9087	2.7088	0.6028
266	beta-hydroxyisovaleroylcarnitine	Amino Acid	Leucine, Isoleucine and Valine Metabolism	35433	LC/MS Pos	100001594	1683	262.1	99159-87-2		21403176			0.8827	0.3433	1.2124	0.7365	1.2915	1.5152	1.0085	0.3963	0.3433	0.9915	0.5886	0.8816	1.681	0.8193	1.6017	1.0605	3.9089	0.8576	0.3433	1.0215
1824	beta-sitosterol	Lipid	Sterol	27414	GC/MS	100001033	2380.8	357.4	83-46-5	222284	192962	C01753	HMDB00852	0.5722	0.5722	1.3216	0.5722	2.1935	0.5722	0.5722	0.5722	0.7843	0.5722	0.855	1.1468	0.9345	0.5722	2.7279	0.7588	1.0028	1.0977	0.6071	1
2754	beta-tocopherol	Cofactors and Vitamins	Tocopherol Metabolism	42316	GC/MS	100001641	2260	222.1	148-03-8	6857447	5256784	C14152	HMDB06335	0.8106	0.8106	0.8106	1.1324	0.8106	0.8106	0.8106	0.9139	0.8454	1.0861	0.8293	0.8106	0.8106	1.6977	0.8106	0.9014	1.4545	0.8106	0.8106	1.2051
6	betaine	Amino Acid	Glycine, Serine and Threonine Metabolism	3141	LC/MS Pos	799	721	118.2	107-43-7	247	24219951173	C00719	HMDB00043	0.9944	0.9384	1.0831	1.5493	0.8916	1.2797	0.9073	0.7997	0.3963	0.5985	1.5403	0.7144	0.8731	1.4834	1.0319	1.0056	1.1652	1.6942	1.2123	0.6775
2788	bilirubin (Z,Z)	Cofactors and Vitamins	Hemoglobin and Porphyrin Metabolism	27716	LC/MS Neg	1090	4812	583.2	635-65-4	5280352	4444055	C00486	HMDB00054	0.5638	0.6835	1.0136	1.5693	0.5638	1.7472	0.5638	0.7893	0.5638	1.0436	0.5638	0.5638	0.5638	0.9864	0.5638	1.4497	0.5638	0.5835	0.5638	0.5638
1239	butyrylcarnitine	Lipid	Fatty Acid Metabolism (also BCAA Metabolism)	32412	LC/MS Pos	100001054	2007	232.2	25576-40-3	439829	184820	C02862	HMDB02013	0.3515	0.9366	2.1496	2.0524	0.38	0.7066	1.1056	0.256	1.0217	0.5367	0.6636	1.337	3.2957	1.4153	0.9783	1.4558	1.6003	0.9445	3.3712	0.8576
249	C-glycosyltryptophan	Amino Acid	Tryptophan Metabolism	48782	LC/MS Pos	100006379	1920	367.15	180509-18-6	10981970	9157171			0.6241	1.0677	0.8714	0.9496	0.9431	0.9856	0.627	0.9607	0.7228	0.5826	0.9792	3.1133	1.1189	1.875	1.5056	1.8818	1.4227	1.2976	1.0144	1.9563
96	cadaverine	Amino Acid	Lysine Metabolism	15308	GC/MS	100000110	1780.4	174	462-94-2;1476-39-7	273	13866593	C01672	HMDB02322	0.3408	5.1647	23.2303	0.3408	1.1282	1.8747	0.4062	0.3408	0.3669	0.6182	0.5818	0.3408	34.9151	2.2876	0.3408	1.0157	0.9843	0.3921	0.3408	0.3408
1826	campesterol	Lipid	Sterol	39511	GC/MS	100001269	2353	343.4	474-62-4	173183	151215	C01789	HMDB02869	0.5081	0.3796	0.3796	2.4313	1	0.3796	1.2127	1.0726	0.3796	0.8778	0.3796	0.3796	0.3796	0.3796	0.3796	0.3796	0.3796	0.3796	0.3796	0.3796
1030	caproate (6:0)	Lipid	Medium Chain Fatty Acid	32489	LC/MS Neg	926	2766	115.2	142-62-1	8892	8552	C01585	HMDB00535	0.6001	1.7447	1.0596	1.0187	1.216	0.6567	0.579	0.9813	0.7301	1.2871	0.9361	1.0558	0.7593	0.7785	1.0994	1.1649	0.7071	1.0551	0.8762	1.0952
1032	caprylate (8:0)	Lipid	Medium Chain Fatty Acid	32492	LC/MS Neg	932	4367	143.2	124-07-2	379	370	C06423	HMDB00482	0.8002	1.8038	1.1557	1.174	1.0377	0.8689	0.7515	0.9623	1.1559	1.1261	0.8362	0.7561	0.759	1.1248	0.8754	2.5305	0.668	1.2009	0.816	1.199
1280	carnitine	Lipid	Carnitine Metabolism	15500	LC/MS Pos	100000007	702	162.2	461-05-2	10917	10455	C00318	HMDB00062	0.9788	1.0122	0.7243	0.8789	1.1906	1.111	0.7042	0.808	0.7731	0.7088	1.2416	1.2131	1.7897	0.8738	0.9878	1.3685	1.6079	1.2923	1.0406	0.8795
1971	chenodeoxycholate	Lipid	Primary Bile Acid Metabolism	37789	LC/MS Neg	1123	5250	391.4	474-24-9;474-25-9	10133		C02528	HMDB00518	0.3308	0.3308	1.0256	0.6943	0.3308	0.6037	0.3308	0.3308	0.3308	9.2558	0.3308	0.3308	1	0.3308	0.3308	0.3308	8.0253	0.3308	0.3308	0.3308
1428	chiro-inositol	Lipid	Inositol Metabolism	37112	GC/MS	100001859	1857	318.1	643-12-9		10254647	C19891	HMDB34220	0.2093	1	0.8849	1.0659	0.2093	1.0167	1.0521	0.2093	1.3687	0.2093	1.2432	0.4626	1.639	0.4669	1.0712	0.5737	0.6922	0.4062	0.8811	1.1347
1968	cholate	Lipid	Primary Bile Acid Metabolism	22842	LC/MS Neg	136	5148	407.4	81-25-4	221493		C00695	HMDB00619	0.366	0.366	0.4533	0.366	1.2221	0.366	0.366	0.366	1	3.4875	0.366	0.366	0.366	0.4638	0.5947	0.366	7.4375	0.366	2.861	0.366
1816	cholestanol	Lipid	Sterol	21131	GC/MS	100000859	2320.8	215.2	80-97-7	6665	6413	C12978	HMDB00908	1.0189	1.9398	1.3483	0.9124	2.035	1.4283	0.7946	0.8179	1.0994	1.1541	2.7169	0.7014	0.8198	0.839	1.2177	0.4264	0.9811	0.952	1.7462	0.8831
1803	cholesterol	Lipid	Sterol	63	GC/MS	266	2316.9	329.3	57-88-5	11025495	4937803	C00187	HMDB00067	0.7699	1.1718	0.8562	0.8512	1.0863	1.0312	0.7106	0.7716	0.7073	0.7651	1.2811	0.8247	1.0162	1.1561	1.0059	0.9941	1.1169	1.0928	1.0409	0.7297
1454	choline	Lipid	Phospholipid Metabolism	15506	LC/MS Pos	1256	674	104.2	67-48-1	305	149278	C00114	HMDB00097	1.1439	0.9948	0.9884	0.8933	1.0218	1.0731	0.9698	0.8782	0.8039	1.0829	1.1752	1.1719	0.9634	0.8974	1.0279	2.1071	0.8599	1.0052	1.0721	0.9474
1455	choline phosphate	Lipid	Phospholipid Metabolism	34396	LC/MS Pos	267	695	184.1	72556-74-2	1014	119298	C00588	HMDB01565	1.1181	1.4363	0.9726	0.7308	1.6324	1.0274	1.0987	0.9453	0.5797	0.9662	2.0262	0.7319	1.5682	0.7552	1.3887	0.5933	1.1784	0.9421	1.2872	0.69
1005	citrate	Energy	TCA Cycle	1564	GC/MS	1124	1763.4	273.1	77-92-9	311	305	C00158	HMDB00094	0.4356	1.5162	1.335	1.7144	0.9245	1.5114	1.3473	1.3106	1.0153	0.6755	0.338	0.9847	0.8409	1.0993	0.7031	0.8942	0.4477	1.2368	1.1583	0.7788
351	citrulline	Amino Acid	Urea cycle; Arginine and Proline Metabolism	2132	LC/MS Pos	391	715	176.1	372-75-8	9750	810	C00327	HMDB00904	0.6216	0.9815	1.0185	1.3237	0.9565	1.0958	1.3322	0.665	0.7797	0.9418	0.4555	2.5487	1.538	2.0035	0.7268	1.8391	1.0643	0.8453	0.8519	1.3949
2742	coenzyme A	Cofactors and Vitamins	Pantothenate and CoA Metabolism	2936	LC/MS Neg	270	1600	766.1	85-61-0;18439-24-2	317	311	C00010	HMDB01423	0.3124	0.776	1	0.3124	0.3124	0.3124	0.3124	0.5456	0.3851	0.5204	2.7734	0.3124	2.4439	0.3124	2.1296	0.3124	2.8559	2.456	2.4368	0.8047
1817	coprostanol	Lipid	Sterol	45986	GC/MS	100005346	2289	215.2	360-68-9		19951861			1.4646	3.9114	0.8872	1.4748	2.8308	1	3.6266	1.5669	0.3292	0.4234	1.1009	0.3292	0.4502	0.5861	0.7416	0.3292	0.4446	0.3292	0.3292	0.3292
1889	cortisone	Lipid	Steroid	1769	LC/MS Pos	273	4420	361.2	53-06-5	222786	361685	C00762	HMDB02802	1.1847	0.9599	1.4051	1.9867	0.9735	0.7338	1.8076	1.0265	0.6306	1.4547	1.4758	0.6234	0.7823	0.6246	0.6259	0.6234	0.813	1.5731	0.6234	1.1827
375	creatine	Amino Acid	Creatine Metabolism	27718	LC/MS Pos	1221	758	132.1	57-00-1	586	566	C00300	HMDB00064	0.8641	1.1556	0.6623	0.7103	0.9618	0.9709	0.6523	0.6964	1.3476	0.7376	0.867	1.353	1.8567	0.4928	1.388	1.4454	2.6643	1.0291	2.2545	1.8781
376	creatinine	Amino Acid	Creatine Metabolism	513	LC/MS Pos	275	730	114.1	60-27-5	588	568	C00791	HMDB00562	0.5973	1.2486	1.4467	1.0704	0.8599	0.9591	1.2979	0.6496	0.8267	0.6281	0.7343	1.1544	1.5889	1.1283	0.7819	1.0409	1.2051	0.7289	0.9164	1.6922
328	cysteine	Amino Acid	Methionine, Cysteine, SAM and Taurine Metabolism	31453	GC/MS	800	1560.1	218	52-90-4;56-89-3	5862	5653	C00097	HMDB00574	0.5962	0.7878	1.1518	0.8986	0.8115	0.9857	0.3589	0.6851	0.3587	0.7764	1.0971	1.1842	2.0646	1.4631	0.8307	1.0462	3.5548	1.4878	1.0441	1.0143
403	cysteine-glutathione disulfide	Amino Acid	Glutathione Metabolism	35159	LC/MS Pos	100001437	821	427.1	13081-14-6	4247235	3455404		HMDB00656	1.7523	0.5719	1.0653	2.5467	1.9802	2.105	1.3818	0.799	0.4165	2.0684	0.7328	0.9347	1.8899	4.5559	0.2682	0.6074	2.2781	0.5345	0.3347	0.2223
330	cystine	Amino Acid	Methionine, Cysteine, SAM and Taurine Metabolism	31454	GC/MS	279	2015.3	218	56-89-3	67678	575	C00491	HMDB00192	0.8857	2.1729	1.0312	1.2527	0.6213	1.7994	0.8828	0.9426	0.6213	1	1.1886	0.853	1.1389	1.39	0.7554	0.7312	0.7171	0.6213	1.1189	0.6213
2686	cytidine	Nucleotide	Pyrimidine Metabolism, Cytidine containing	514	LC/MS Pos	827	1065	244	65-46-3	6175	5940	C00475	HMDB00089	0.591	3.7424	0.7528	0.6448	1.9158	1	1.7526	4.3819	2.1946	0.6407	0.3766	1.1491	0.3766	0.3766	0.4739	0.3766	0.3766	0.5596	0.3766	5.6079
2684	cytidine 3'-monophosphate (3'-CMP)	Nucleotide	Pyrimidine Metabolism, Cytidine containing	2959	LC/MS Pos	105	1181	323.9	84-52-6	66535	225079	C05822		1.2422	2.1728	1.1444	2.2233	1.0626	1.083	1.2492	1.4533	0.7391	1.36	0.7246	0.6721	0.6288	1.2247	0.9374	0.8243	0.4724	0.7837	0.7584	0.694
1456	cytidine 5'-diphosphocholine	Lipid	Phospholipid Metabolism	34418	LC/MS Pos	1220	777	489.1	33818-15-4	13804	21531769	C00307	HMDB01413	1.6295	0.5017	1.0664	0.5342	0.5943	1.1623	0.6068	0.3964	0.4037	0.6202	2.6468	1.1432	1.6819	0.7297	0.9939	1.0061	1.3133	1.4032	2.412	0.6137
2683	cytidine 5'-monophosphate (5'-CMP)	Nucleotide	Pyrimidine Metabolism, Cytidine containing	2372	LC/MS Pos	282	887	324	63-37-6	6131	5414497	C00055	HMDB00095	0.9682	1.5321	0.4375	1.0954	0.8427	1.0318	0.628	1.0522	1.047	0.6385	1.3458	0.5573	1.2072	0.696	1.1848	0.8354	0.8965	1.5715	1.3949	0.429
1263	decanoylcarnitine	Lipid	Fatty Acid Metabolism(Acyl Carnitine)	33941	LC/MS Pos	100001251	4700	316.3	1492-27-9	10245190	8420677		HMDB00651	0.4321	0.4321	0.4321	0.4321	0.4321	0.4321	0.4321	0.4321	0.4321	0.4321	0.4321	2.0669	0.7243	3.7936	0.4321	2.0134	1	0.7668	0.9339	1.2063
2747	dehydroascorbate	Cofactors and Vitamins	Ascorbate and Aldarate Metabolism	1659	GC/MS	301	1800	245.1	490-83-5	835	812	C05422	HMDB01264	2.3823	3.0265	1.3641	0.558	3.0501	1.4417	0.2769	1.1283	1.1795	2.2082	2.4555	0.6319	0.5761	0.8699	0.7153	0.4305	0.5907	1.4597	0.8717	0.0842
1894	dehydroisoandrosterone sulfate (DHEA-S)	Lipid	Steroid	32425	LC/MS Neg	100000792	4771	367.2	651-48-9	12594	12074	C04555	HMDB01032	0.2682	1.4888	0.6089	1.9251	0.2682	0.4755	1.6298	2.0519	0.7947	0.3523	0.2682	1.2756	0.2682	1	0.2682	0.3668	0.2682	2.1173	0.8819	1.4071
2756	delta-tocopherol	Cofactors and Vitamins	Tocopherol Metabolism	33418	GC/MS	100001216	2232	474.4	119-13-1	92094	83144	C14151	HMDB02902	0.3318	1.0258	0.3318	0.9742	0.3974	0.3318	0.9447	0.3318	1.3825	4.1091	0.3318	0.3318	0.3318	3.3287	0.3318	0.3318	1.027	0.3318	0.3318	0.792
1279	deoxycarnitine	Lipid	Carnitine Metabolism	36747	LC/MS Pos	100001662	759	146.1	6249-56-5	134	705	C01181	HMDB01161	1.0362	0.7413	2.835	0.9141	0.8266	1.3477	0.8314	0.4456	0.9638	0.4804	1.5558	1.0658	4.8604	1.5009	0.8598	1.1263	1.1995	0.8783	2.9476	0.7549
1985	deoxycholate	Lipid	Secondary Bile Acid Metabolism	1114	LC/MS Neg	302	5268	391.4	83-44-3	222528	389318	C04483	HMDB00626	0.0599	0.0599	1.0801	1.6175	11.4067	0.0599	0.8804	0.0599	0.0599	10.2843	0.0599	0.0599	0.7584	0.7461	0.9199	0.0599	4.8778	0.0599	0.0599	0.0599
1092	dihomo-linoleate (20:2n6)	Lipid	Polyunsaturated Fatty Acid (n3 and n6)	17805	LC/MS Neg	1231	5722	307.3	2091-39-6	6439848	4944228	C16525	HMDB05060	0.7077	0.9791	0.9653	1.0515	1.4722	0.7439	0.9482	1.2622	1.1912	1.2637	0.9386	0.6996	1.0209	2.1056	1.3522	1.0664	0.7447	1.0902	0.7454	0.4753
1087	dihomo-linolenate (20:3n3 or n6)	Lipid	Polyunsaturated Fatty Acid (n3 and n6)	35718	LC/MS Neg	100001739	5600	305.4	17046-59-2	5280581	4471954	C03242	HMDB02925	0.9151	1.0496	1.0747	0.9114	1.4063	0.9139	0.7035	0.7999	0.9849	1.8011	1.0151	0.7548	1.3528	3.2884	1.46	1.0242	1.8006	0.807	0.8797	0.7576
830	dihydroxyacetone phosphate (DHAP)	Carbohydrate	Glycolysis, Gluconeogenesis, and Pyruvate Metabolism	15522	GC/MS	309	1737	315.1	102783-56-2	668	3833110	C00111	HMDB01473	1.1081	2.1859	0.5309	0.3039	0.3039	1	0.5908	0.8658	1.1489	0.3039	1.0845	0.9806	0.3039	0.3039	2.3991	0.5424	0.3039	1.1488	1.5482	0.7191
1091	docosadienoate (22:2n6)	Lipid	Polyunsaturated Fatty Acid (n3 and n6)	32415	LC/MS Neg	100001182	6017	335.4	7370-49-2	5282807	4445934	C16533	HMDB61714	0.8201	1.0593	1.0498	0.6617	1.2318	1.1556	0.8519	0.6148	0.8876	0.8165	0.9934	1.3074	2.0929	2.5889	0.9614	1.7854	1.0066	1.2175	0.8358	0.8452
1079	docosahexaenoate (DHA; 22:6n3)	Lipid	Polyunsaturated Fatty Acid (n3 and n6)	19323	LC/MS Neg	100000665	5518	327.3	6217-54-5	445580	393183	C06429	HMDB02183	0.8691	1.4891	0.8495	0.8913	1.1293	0.9792	0.7312	1.0434	0.8779	1.4031	1.0083	0.9917	0.819	1.5203	1.0255	1.1708	0.9549	1.2633	1.0349	0.8204
1078	docosapentaenoate (n3 DPA; 22:5n3)	Lipid	Polyunsaturated Fatty Acid (n3 and n6)	32504	LC/MS Neg	100001181	5574	329.4	2234-74-4	6441454		C16513	HMDB01976	0.9561	1.272	0.9731	0.9083	1.4567	0.7384	0.7456	1.4386	1.1385	2.11	0.9922	0.8309	0.9351	2.1572	1.2962	1.0078	1.2943	1.3291	0.8343	0.5616
1090	docosapentaenoate (n6 DPA; 22:5n6)	Lipid	Polyunsaturated Fatty Acid (n3 and n6)	37478	LC/MS Neg	100001580	5625	329.4	25182-74-5	6441454	4945614	C16513	HMDB01976	0.7924	1.3039	0.9983	0.7007	1.3288	0.9929	0.7841	0.4995	0.8789	1.2747	1.0685	1.1172	1.0017	1.7874	1.1361	1.0422	0.946	0.4469	1.4332	0.8076
1080	docosatrienoate (22:3n3)	Lipid	Polyunsaturated Fatty Acid (n3 and n6)	32417	LC/MS Neg	100001195	5825	333.4	59708-86-0	5312556	4471981	C16534	HMDB02823	0.5661	0.9372	1.2088	1.0093	1.2554	0.9303	0.8573	0.875	1.0126	1.1453	0.7851	0.9776	1.6534	2.3611	1.2819	1.4972	0.9657	1.2287	0.9907	0.5564
1077	eicosapentaenoate (EPA; 20:5n3)	Lipid	Polyunsaturated Fatty Acid (n3 and n6)	18467	LC/MS Neg	2050	5442	301.3	10-2005-9;10417-94-4	446284	393682	C06428	HMDB01999	1.0663	1.4196	0.7495	0.6758	1.1961	0.6472	0.6499	1.08	0.6911	1.4304	1.0202	0.5024	1.0774	1.1188	0.9798	0.555	0.7678	1.0967	1.1818	0.5102
1062	eicosenoate (20:1)	Lipid	Long Chain Fatty Acid	33587	LC/MS Neg	100001335	5955	309.4		5282768	4445895		HMDB02231	0.9051	1.06	0.9873	1.053	1.2659	0.8156	0.986	1.6915	1.3454	0.7256	1.1245	0.6355	1.3701	2.8089	1.0127	0.9678	0.6182	1.5469	0.5258	0.4919
3087	ergothioneine	Xenobiotics	Food Component/Plant	37459	LC/MS Pos	100002154	847	230.2	58511-63-0	3032311	2297320	C05570	HMDB03045	0.3428	0.4287	0.8405	1.1528	0.4156	0.6752	0.3865	2.4012	2.2766	0.9923	0.6252	1.0077	1.6206	2.568	0.7851	1.7549	2.1737	7.0014	3.7853	0.7258
1066	erucate (22:1n9)	Lipid	Long Chain Fatty Acid	1552	LC/MS Neg	1087	6273.3	337.4	112-86-7	5281116	7924	C08316	HMDB02068	1.2897	1.0712	0.7519	0.5819	0.7781	0.8462	0.6507	1.1079	1.1836	0.4951	1.1516	1.0952	1.7779	4.0344	0.7219	1.2296	0.9288	1.6479	0.7223	0.7059
3089	erythritol	Xenobiotics	Food Component/Plant	20699	GC/MS	100000846	1517.5	217	149-32-6	222285	13835932	C00503	HMDB02994	0.6832	0.5859	1.8991	1.1644	0.9734	1.0089	0.8989	0.5439	0.6492	0.6127	1.6138	1.1084	2.2255	0.9116	1.1168	0.9911	1.0654	0.9248	1.3194	1.2557
998	erythronate*	Carbohydrate	Aminosugar Metabolism	33477	GC/MS	100001320	1546.9	292.1	88759-55-1	2781043	2061231		HMDB00613	0.6932	0.624	1.2936	0.6787	0.7844	0.7722	0.862	0.9819	0.2281	0.6272	1.8993	1.0181	2.1811	1.4558	1.1167	1.0693	1.9426	1.1551	1.191	0.5961
1460	ethanolamine	Lipid	Phospholipid Metabolism	1497	GC/MS	420	1304	174.1	141-43-5	700	13835336	C00189	HMDB00149	1.021	1.6006	0.8661	0.7103	1.123	0.7172	0.7086	0.5593	0.545	1.2212	1.5192	0.799	1.1054	0.979	0.9442	1.3805	1.1563	1.3147	1.568	0.4983
2736	flavin adenine dinucleotide (FAD)	Cofactors and Vitamins	Riboflavin Metabolism	2134	LC/MS Neg	327	2413	784.1	146-14-5;84366-81-4	643975	559059	C00016	HMDB01248	1.0071	1.2006	0.8168	1.0406	1.1253	1.0346	0.6444	0.8226	0.6473	0.9929	1.8876	0.7003	1.0188	0.6118	0.9814	0.5494	1.0551	1.1491	1.1094	0.5305
925	fructose	Carbohydrate	Fructose, Mannose and Galactose Metabolism	577	GC/MS	878	1758	217	57-48-7	5984	5764	C00095	HMDB00660	0.7137	1.5619	1.3277	1.003	0.9909	0.6996	0.6263	1.4437	0.997	0.7527	3.4116	0.6248	1.5983	0.9263	1.3984	1.4127	1.0216	0.8699	0.9865	1.43
825	fructose-6-phosphate	Carbohydrate	Glycolysis, Gluconeogenesis, and Pyruvate Metabolism	12021	GC/MS	1232	1994.9	315.1	103213-47-4	69507	19969987	C05345	HMDB00124	1.2419	2.8868	1.5457	0.8378	0.4509	1.4195	0.983	0.9247	0.8672	0.2656	2.0297	1.4111	3.8499	0.9092	1.017	0.7558	0.1202	1.2316	4.4656	0.6892
1014	fumarate	Energy	TCA Cycle	1643	GC/MS	330	1382.1	245	100-17-8	444972	10197150	C00122	HMDB00134	0.7845	1.356	1.5043	0.631	1.0923	1.3179	0.7616	0.9617	0.9694	0.6534	1.1248	0.9679	2.3886	0.5349	1.3923	0.7674	1.1839	1.1505	1.0306	0.9599
940	galactose	Carbohydrate	Fructose, Mannose and Galactose Metabolism	12055	GC/MS	287	1793.8	203.9	59-23-4	3037556	2301265	C01582	HMDB00143	0.3203	15.6409	1.8752	0.3203	0.6641	0.5031	0.7462	1.4541	0.5974	1.7815	0.7447	0.4286	1.0231	0.7081	0.3203	0.3203	2.0081	2.2141	1.4431	1
44	gamma-aminobutyrate (GABA)	Amino Acid	Glutamate Metabolism	1416	GC/MS	141	1539.7	304.1	56-12-2	119	116	C00334	HMDB00112	0.9463	1.3068	1.3946	0.2326	0.9256	1.0149	0.4765	1.0943	0.5276	0.8475	1.1106	0.8018	1.6661	0.5843	0.9851	1.1042	1.515	1.4013	3.0043	0.3701
418	gamma-glutamylglutamate	Peptide	Gamma-glutamyl Amino Acid	36738	LC/MS Pos	331	1036	277.1	1116-22-9	92865	83831	C05282	HMDB11737	0.7197	0.922	0.9529	0.5939	0.7256	1.4558	0.3594	0.8863	1.0679	1.0196	0.8852	1.6972	1.9362	1.4668	0.8982	1.3626	1.5393	0.9804	1.1796	1.1187
419	gamma-glutamylglutamine	Peptide	Gamma-glutamyl Amino Acid	2730	LC/MS Pos	1140	806	276.1	10148-81-9	150914	133013	C05283	HMDB11738	0.389	1.0713	0.9283	0.9455	1.0572	1.6382	0.798	0.9679	1.2452	1.0915	0.8372	1.3804	0.9787	1.8413	0.951	1.0664	0.775	1.0213	0.6073	1.9321
423	gamma-glutamylleucine	Peptide	Gamma-glutamyl Amino Acid	18369	LC/MS Pos	1268	2744	261.2	2566-39-4	151023	133115		HMDB11171	0.4665	0.999	1.2386	0.9804	0.6228	1.4365	0.4665	0.4665	0.4665	0.8137	0.4665	0.4665	2.402	0.9908	1.1496	1.001	1.0862	1.0022	0.8512	0.4665
2757	gamma-tocopherol	Cofactors and Vitamins	Tocopherol Metabolism	42315	GC/MS	100001308	2264	223.1	54-28-4	14986	14266	C02483	HMDB01492	0.7018	0.7611	0.752	1.703	0.6834	0.7916	0.8848	3.0446	2.269	5.355	0.8485	1.1152	0.7943	7.1814	0.7921	1.3892	4.0826	1.4028	0.1524	1.6498
3020	gluconate	Xenobiotics	Food Component/Plant	587	GC/MS	338	1879.4	333	527-07-1	10690	10240	C00257	HMDB00625	1.0042	1.5558	7.451	1.1034	1.2193	1.2021	0.9958	0.9646	1.2263	0.93	2.7835	0.8305	3.0386	0.5204	0.7167	0.799	0.9735	0.5212	0.7659	1.1191
821	glucose	Carbohydrate	Glycolysis, Gluconeogenesis, and Pyruvate Metabolism	20488	GC/MS	572	1866.8	217.1	50-99-7	79025	71358	C00031	HMDB00122	0.306	2.1127	1.8502	2.8221	1.7302	2.0809	1.8281	1.8496	1.3277	1.7212	0.3687	0.4567	0.193	0.3942	0.4822	0.6723	0.3628	0.4633	0.4182	1.4829
822	glucose 6-phosphate	Carbohydrate	Glycolysis, Gluconeogenesis, and Pyruvate Metabolism	31260	GC/MS	291	2042.7	387.2	103192-55-8	5958	19952394	C00668	HMDB01401	0.9667	3.1603	1.3605	0.9324	0.4441	1.355	0.691	1.1934	1.064	0.2962	1.7342	1.0333	3.1987	0.8363	0.889	0.7327	0.0835	1.6497	4.3612	0.8243
39	glutamate	Amino Acid	Glutamate Metabolism	57	LC/MS Pos	561	700	148.1	56-86-0	611	591	C00025	HMDB00148	0.763	0.9459	0.905	0.6962	0.7563	0.9437	0.6796	0.9465	1.223	0.8456	0.7767	1.7422	1.2171	1.3838	1.0535	1.1637	1.2525	1.4903	1.2393	1.532
49	glutamate, gamma-methyl ester	Amino Acid	Glutamate Metabolism	33487	LC/MS Pos	100001103	1062	162.1	1499-55-4	68662	66546			0.7152	1.5193	0.9698	0.5175	1.4402	1.4357	0.641	0.6774	1.1562	0.6486	1.2495	0.856	1.6097	0.7707	1.5985	1.0302	2.4514	2.3735	0.7332	0.803
40	glutamine	Amino Acid	Glutamate Metabolism	53	LC/MS Pos	563	684	147.2	56-85-9	5961	5746	C00064	HMDB00641	0.9143	1.1083	0.9515	0.9377	1.1072	1.2208	0.7982	1.045	1.6779	0.818	1.0101	1.6893	0.6812	1.2012	0.7847	0.9963	0.7924	1.0037	0.7391	1.6481
401	glutathione, oxidized (GSSG)	Amino Acid	Glutathione Metabolism	27727	LC/MS Pos	448	1535	613.1	103239-24-3	65359	58835	C00127	HMDB03337	0.9849	1.1228	0.6397	1.1502	1.2104	1.2208	0.87	1.0152	1.0099	0.9901	1.2073	1.765	0.8484	0.7816	0.7943	1.376	0.768	0.9564	1.0721	0.8382
400	glutathione, reduced (GSH)	Amino Acid	Glutathione Metabolism	2127	LC/MS Pos	496	1274	308.1	70-18-8	124886	111188	C00051	HMDB00125	0.5203	2.0028	3.8626	0.3461	0.2977	0.2545	0.1306	0.5028	0.6159	1.3841	6.1622	0.3884	8.0063	0.2984	5.7194	0.4596	10.2118	6.5101	5.9664	5.1519
1703	glycerol	Lipid	Glycerolipid Metabolism	15122	GC/MS	1254	1311	205	56-81-5	753	733	C00116	HMDB00131	0.8974	1.0082	0.9222	0.9918	0.9779	1.0202	0.9034	1.3489	0.6953	1.0927	1.8024	0.3803	1.4114	0.9144	1.1006	0.9238	1.3665	1.3071	1.2842	0.8668
1704	glycerol 3-phosphate	Lipid	Glycerolipid Metabolism	15365	GC/MS	100000258	1719.7	357.1	29849-82-9	754	734	C00093	HMDB00126	1.0875	1.4146	0.8805	1.3179	1.0937	1.0231	0.6219	0.7062	0.8493	0.9769	1.756	0.882	1.4954	0.4327	1.7039	1.871	0.9066	0.7305	1.8493	0.9093
1463	glycerophosphoethanolamine	Lipid	Phospholipid Metabolism	37455	GC/MS	100001620	1906	357.1	33049-08-0	123874	110410	C01233	HMDB00114	1	1.5764	0.8964	1.0103	1.1831	0.9252	0.57	0.6126	0.6704	1.137	1.4625	0.3308	0.3308	0.4246	2.2057	1.6147	1.9177	0.6911	2.3451	0.4381
1709	glycerophosphoglycerol	Lipid	Glycerolipid Metabolism	48857	GC/MS	100001619	1969	357.3		439964	388990	C03274		1.0609	1.0983	0.7086	0.7379	0.9791	0.9434	1.0209	0.5769	0.5651	0.8506	4.5268	0.7089	2.9796	0.7709	4.2395	1.4808	2.4994	1.1324	8.1205	0.6114
1457	glycerophosphorylcholine (GPC)	Lipid	Phospholipid Metabolism	15990	LC/MS Pos	100000269	694	258.1	28319-77-9	71920	571409	C00670	HMDB00086	1.1419	1.2552	0.8482	1.2594	1.1303	0.9503	0.668	0.6452	0.9128	1.0497	1.0793	0.3289	1.2382	0.3476	1.5033	1.5639	0.7706	0.6029	1.7604	0.5072
1	glycine	Amino Acid	Glycine, Serine and Threonine Metabolism	11777	GC/MS	340	1166	101.9	56-40-6	750	730	C00037	HMDB00123	0.7993	1.4647	0.9074	0.8047	0.9904	1.0218	0.7417	0.9188	0.7117	0.9367	1.5165	1.8331	1.4365	0.8479	1.0096	1.1753	1.4099	1.7329	1.5604	0.7315
1972	glycochenodeoxycholate	Lipid	Primary Bile Acid Metabolism	32346	LC/MS Neg	1628	5245	448.4	16564-43-5	12544		C05466	HMDB00637	0.283	0.283	0.283	1.0666	0.283	1	0.7286	0.283	0.4462	1.7662	0.283	0.283	0.283	1.3337	0.283	0.3895	2.8116	0.283	1.5502	0.6696
1969	glycocholate	Lipid	Primary Bile Acid Metabolism	18476	LC/MS Neg	342	5104	464.4	475-31-0;863-57-0	10140	9734	C01921	HMDB00138	0.2911	0.2911	0.2911	1.192	0.2911	0.2911	0.4249	0.2911	0.2911	5.7877	0.2911	0.2911	0.2911	0.808	0.2911	0.2911	13.9047	0.2911	0.2911	0.2911
2015	glycocholenate sulfate*	Lipid	Secondary Bile Acid Metabolism	32599	LC/MS Neg	100001989	4763	254.8						0.6997	0.3836	1.2075	5.5356	1	0.3836	0.7317	0.3836	0.3836	6.6887	0.6654	0.3836	0.3836	2.1287	0.6448	0.3836	6.4252	0.3836	0.3836	0.3836
1987	glycodeoxycholate	Lipid	Secondary Bile Acid Metabolism	18477	LC/MS Neg	100000436	5265	448.4	360-65-6	3035026		C05464	HMDB00631	0.5519	0.5519	0.5919	0.8656	0.5519	0.5519	0.5519	0.5519	0.5519	6.6654	0.5519	0.5519	0.5519	1.1344	0.5519	0.5519	12.9377	0.5519	0.5519	0.5519
1993	glycolithocholate sulfate*	Lipid	Secondary Bile Acid Metabolism	32620	LC/MS Neg	100001657	5015	512.3	15324-64-8	72222	65188	C11301	HMDB02639	0.5468	0.5468	0.5468	1.7391	1	0.5468	0.7677	0.5468	0.5468	2.6988	0.5468	0.7363	0.5468	1.0896	0.5468	0.5468	3.5138	0.5468	0.5468	0.7448
558	glycylleucine	Peptide	Dipeptide	34398	LC/MS Pos	100001258	2236	189.1	869-19-2	92843	83812	C02155	HMDB00759	0.5206	1.436	0.551	0.9813	0.6605	1.0381	0.5089	0.4958	0.4996	0.9795	1.6226	1.518	1.2346	1.7865	0.6506	1.5766	1.599	1.2897	1.0187	0.6423
568	glycylvaline	Peptide	Dipeptide	18357	LC/MS Pos	100000487	1572	175.1	1963-21-9	97417	2006926		HMDB28854	1.1079	0.5064	0.5064	0.5354	0.5064	0.9317	0.97	0.5064	0.5064	0.992	0.5064	1.5491	0.8815	2.3464	0.5064	1.061	1.8545	0.9172	1.2531	1.008
381	guanidinoacetate	Amino Acid	Creatine Metabolism	1480	GC/MS	344	1581	171	352-97-6	763	743	C00581	HMDB00128	0.6024	0.6024	0.8242	1.2739	1.1203	1.1088	0.765	0.6045	1.1143	0.9912	0.6024	0.6024	0.6024	0.6024	0.9584	1.4188	1.0723	1	1.6031	0.7212
2628	guanine	Nucleotide	Purine Metabolism, Guanine containing	418	GC/MS	172	1942.3	352.1	73-40-5	764	744	C00242	HMDB00132	0.9028	2.2357	1.5668	0.573	1.6207	1.5271	2.1303	2.6089	1.0972	0.8615	0.1376	1.2948	0.7338	0.7323	1.5753	0.7435	0.5659	0.7396	0.2467	7.7048
2627	guanosine	Nucleotide	Purine Metabolism, Guanine containing	1573	LC/MS Pos	1099	1676	284	118-00-3	6802	6544	C00387	HMDB00133	0.6687	1.1534	1.0692	0.7465	1.2	1.197	0.7586	1.1141	0.8021	0.9437	0.336	1.6368	0.418	1.0563	1.0606	1.1859	0.3364	0.4951	0.336	1.5537
2623	guanosine 3'-monophosphate (3'-GMP)	Nucleotide	Purine Metabolism, Guanine containing	39786	LC/MS Neg	100002704	792.2	362.1	117-68-0	3522	3402			1.8121	2.3374	0.7064	2.3059	1.6623	1.5994	1.2179	0.6074	0.3482	1	1.1158	0.3547	0.6657	0.3482	0.4718	0.4408	0.5764	1.237	0.3482	0.3482
2622	guanosine 5'- monophosphate (5'-GMP)	Nucleotide	Purine Metabolism, Guanine containing	2849	LC/MS Pos	347	1300	364	5550-12-09	6804	741	C00144	HMDB01397	1.141	0.9862	0.0945	1.0976	1.0138	1.0199	0.6939	0.3087	0.5581	0.6108	1.4789	0.0309	1.3781	0.0449	0.6974	0.0309	1.6086	1.4781	1.4954	0.0309
960	guanosine 5'-diphospho-fucose	Carbohydrate	Nucleotide Sugar	15903	LC/MS Neg	335	797	588.1	15839-70-0		21402997			1.0065	0.8585	0.8423	0.7801	1.0316	1.2894	0.6776	0.6776	0.6776	0.8051	1.5897	0.96	1.3429	0.7272	0.9813	1.1596	1	1.3268	1.0611	0.6776
2787	heme	Cofactors and Vitamins	Hemoglobin and Porphyrin Metabolism	41754	LC/MS Neg	100001386	5309.6	646.1	14875-96-8	26945		C00032	HMDB03178	1.9409	2.4592	1.8926	1.5883	0.5711	1.5949	3.631	2.9495	1.4698	1.032	0.7663	0.4752	0.6278	0.6304	0.2194	0.968	0.1855	2.3979	0.2016	0.4913
1031	heptanoate (7:0)	Lipid	Medium Chain Fatty Acid	1644	LC/MS Neg	925	3695	129.2	111-14-8	8094	7803	C17714	HMDB00666	0.8675	1.4209	0.6628	0.9211	0.8687	0.6628	0.6895	1.3669	0.6628	0.9461	1.1467	1.0232	0.691	1.4224	1.0075	1.5053	0.9925	1.3585	0.9307	1.1709
1260	hexanoylcarnitine	Lipid	Fatty Acid Metabolism(Acyl Carnitine)	32328	LC/MS Pos	100000781	3174	260.2	6920-35-0	6426853	4932273		HMDB00705	0.3865	0.863	2.0319	2.078	0.3523	0.5971	1.0019	0.4095	0.9609	0.5766	0.7078	1.1908	1.5757	1.6088	0.9453	1.7946	1.1263	1.3626	2.9603	0.9981
68	histamine	Amino Acid	Histidine Metabolism	1574	LC/MS Pos	354	570	112.2	51-45-6	774	753	C00388	HMDB00870	0.722	1.4797	1.4853	1.3525	0.8417	1.4689	0.8017	1.4229	1.3028	0.7834	0.6398	1.517	0.6325	1.065	0.8744	1.113	1.0127	0.9873	0.1257	0.808
55	histidine	Amino Acid	Histidine Metabolism	59	LC/MS Neg	355	757	154.1	5934-29-2	6274	752	C00135	HMDB00177	0.6897	1.1275	0.9294	0.7634	1.1586	1.1732	0.6378	0.7026	0.55	0.9642	0.9525	1.2266	1.0841	1.1691	0.8933	1.3576	1.1282	1.0425	1.0358	0.664
337	hypotaurine	Amino Acid	Methionine, Cysteine, SAM and Taurine Metabolism	590	GC/MS	358	1598.5	188	300-84-5	107812	96959	C00519	HMDB00965	0.5918	1.2028	0.7485	0.6966	0.8418	0.5279	0.5265	0.4298	0.4566	0.8293	1.794	1.5881	4.3122	1.8937	1.286	1.2749	2.3856	0.831	2.0093	1.1582
2573	hypoxanthine	Nucleotide	Purine Metabolism, (Hypo)Xanthine/Inosine containing	3127	LC/MS Neg	171	1313	135.1	68-94-0	790	768	C00262	HMDB00157	0.9216	1.1578	0.9428	0.6081	1.1012	1.0328	0.6781	0.7559	0.7002	0.7739	1.2732	1.365	1.3546	1.0711	0.9672	1.3299	1.1037	0.9046	1.1441	0.9126
2792	I-urobilinogen	Cofactors and Vitamins	Hemoglobin and Porphyrin Metabolism	32426	LC/MS Neg	100001226	4181	591.3	14684-37-8	26818	24980	C05790	HMDB04157	0.3922	0.3922	0.3922	0.538	0.5018	0.3922	0.3922	0.3922	0.3922	1.9902	0.3922	0.3922	0.3922	1.462	0.3922	0.3922	5.5696	0.3922	0.3922	0.3922
66	imidazole propionate	Amino Acid	Histidine Metabolism	40730	LC/MS Pos	100003434	1011.7	141.1	1074-59-5	70630	63798		HMDB02271	0.1064	3.333	0.9096	0.1064	0.2471	0.2224	0.1064	0.1064	2.8149	4.5149	0.1064	1.0904	3.2438	0.2244	0.3416	0.3422	6.5862	0.1064	6.0336	0.1064
212	indolelactate	Amino Acid	Tryptophan Metabolism	18349	GC/MS	100000463	1964.9	202	832-97-3	92904	83867	C02043	HMDB00671	0.4835	1.0146	0.4835	0.7117	1.0213	0.9837	1.9175	0.4835	0.5376	0.4835	0.4835	0.6954	1.1391	0.7023	0.4835	0.4835	1.3881	1.0774	1.6617	0.9854
2572	inosine	Nucleotide	Purine Metabolism, (Hypo)Xanthine/Inosine containing	1123	LC/MS Neg	361	1600	267.2	58-63-9	6021	21241953	C00294	HMDB00195	0.8177	1.369	1.0119	0.8088	1.2916	0.9881	0.7997	1.0668	0.9543	1.1537	0.781	1.3871	0.8308	1.1164	1.1738	1.0458	0.7808	0.823	0.8314	1.4297
2571	inosine 5'-monophosphate (IMP)	Nucleotide	Purine Metabolism, (Hypo)Xanthine/Inosine containing	2133	LC/MS Pos	362	1310	349	4691-65-0	8582	5482599	C00130	HMDB00175	2.3706	1.1752	0.1138	0.9616	1.0384	2.0373	1.5407	0.3426	0.7927	0.8204	1.8247	0.1138	1.1262	0.1138	0.3868	0.1138	0.7383	1.4367	0.6915	0.1138
1435	inositol 1-phosphate (I1P)	Lipid	Inositol Metabolism	1481	GC/MS	370	2057.8	318.1	573-35-3;106032-59-1	440194	17215924	C04006	HMDB00213	1.0475	1.6592	0.9525	0.9412	1.5519	0.9432	0.6655	0.9486	0.8798	0.8287	2.3942	0.7052	1.2114	1.0818	1.5781	0.7769	1.8047	1.3887	1.2198	0.7619
828	Isobar: fructose 1,6-diphosphate, glucose 1,6-diphosphate, myo-inositol 1,4 or 1,3-diphosphate	Carbohydrate	Glycolysis, Gluconeogenesis, and Pyruvate Metabolism	36984	LC/MS Neg	100002180	572	339						1.0613	0.4175	0.433	0.807	0.7103	1.2248	0.4057	0.6935	1.2797	0.7707	5.3979	0.2986	1.249	0.851	1.5376	1.7007	2.5629	1.0016	3.672	0.9984
299	isobutyrylcarnitine	Amino Acid	Leucine, Isoleucine and Valine Metabolism	33441	LC/MS Pos	100001055	1941	232.2	25518-49-4	168379			HMDB00736	0.3274	1.3562	1.8045	0.9799	1.5799	2.4852	1.1618	0.2282	1.0201	0.82	0.0793	0.2107	3.4006	0.4031	1.3179	0.8223	1.1775	0.2623	1.7109	0.3147
283	isoleucine	Amino Acid	Leucine, Isoleucine and Valine Metabolism	1125	LC/MS Pos	376	1614	132.1	73-32-5	6306	769	C00407	HMDB00172	0.7052	0.9732	0.8063	0.7885	1.0249	1.1257	0.5947	0.6335	0.5954	0.9062	0.9751	1.58	1.4181	1.2553	1.056	1.9623	1.5293	0.9206	1.3353	1.0813
592	isoleucylglycine	Peptide	Dipeptide	40008	LC/MS Pos	100003169	1732	189.2	868-28-0	342532	303621			0.4965	1.0632	0.9431	0.4965	1.2089	0.6282	0.4965	1.0437	0.4966	0.7111	1.2256	1.5143	1.5651	1.4402	0.932	1.2605	1.2021	0.9563	0.6161	0.7754
262	isovalerylcarnitine	Amino Acid	Leucine, Isoleucine and Valine Metabolism	34407	LC/MS Pos	100001393	2533	246.2	31023-24-2	6426851	4932271		HMDB00688	0.2585	0.5172	1.9754	1.212	1.5704	2.3503	1.4582	0.2085	0.5342	0.7422	0.2085	0.3995	5.6136	0.788	1.7303	1.2745	0.5223	0.2085	2.2294	0.5578
218	kynurenine	Amino Acid	Tryptophan Metabolism	15140	LC/MS Pos	100000265	1902	209.1	2922-83-0	161166	141580	C00328	HMDB00684	0.5335	0.9579	0.6872	0.9107	1.0927	1.4076	0.5639	0.3291	0.2988	0.7226	1.1265	1.6229	1.2952	1.5861	1.0421	3.4713	1.4718	0.6518	3.2464	0.5917
2794	L-urobilin	Cofactors and Vitamins	Hemoglobin and Porphyrin Metabolism	40173	LC/MS Pos	100002568	4091	595.4	34217-90-8	5280818	4444369	C05793	HMDB04159	0.3206	0.3206	1.4684	0.7066	0.3206	0.3206	9.3148	0.3206	0.3206	0.3206	0.3206	0.3206	1.6811	1	0.3206	0.3206	0.3206	0.3206	0.3206	0.7345
838	lactate	Carbohydrate	Glycolysis, Gluconeogenesis, and Pyruvate Metabolism	527	GC/MS	482	1102.8	116.9	79-33-4	612	592	C00186	HMDB00190	0.7419	0.8576	0.9945	0.7181	0.8323	1.0184	0.7441	0.754	0.5844	0.738	1.6853	1.1377	2.2442	1.2379	1.147	1.1495	1.8143	1.0055	1.9578	0.6994
1801	lathosterol	Lipid	Sterol	33488	GC/MS	100001105	2337	458.5	80-99-9;80-99-9	65728	59151	C01189	HMDB01170	0.7166	0.7675	0.9452	0.6021	0.355	1.1543	1.2477	0.5372	0.5194	0.4741	1.532	0.5418	1.7486	1.0966	1	1.2109	5.5869	2.2565	5.0786	0.355
1266	laurylcarnitine	Lipid	Fatty Acid Metabolism(Acyl Carnitine)	34534	LC/MS Pos	100001392	5066	344.3	25518-54-1	10427569	8602997		HMDB02250	0.4696	0.4696	0.4696	0.4696	0.4696	0.4696	0.4696	0.4696	0.4696	0.4696	0.4696	1.2732	0.4696	3.8909	0.4696	0.4696	0.7268	0.4696	0.4696	0.4696
254	leucine	Amino Acid	Leucine, Isoleucine and Valine Metabolism	60	LC/MS Pos	397	1674	132.2	61-90-5	6106	5880	C00123	HMDB00687	0.6331	1.1536	0.842	0.8283	1.0447	1.3632	0.6459	0.7392	0.4951	1.0705	0.9389	1.4269	1.4776	1.3501	0.8891	1.8018	1.588	0.9553	1.3288	0.7461
610	leucylglycine	Peptide	Dipeptide	40045	LC/MS Pos	100003185	1800	189.2	686-50-0	79070	71402			0.2578	3.1485	1.1827	0.508	0.6259	0.2578	0.2578	0.964	0.2578	0.6126	1.4047	1.1583	1.0004	1.2156	1.0737	0.6661	0.7869	1.6898	0.2578	0.9996
1083	linoleate (18:2n6)	Lipid	Polyunsaturated Fatty Acid (n3 and n6)	1105	LC/MS Neg	180	5533	279.3	60-33-3	5280450	4444105	C01595	HMDB00673	0.9482	1.2121	0.8351	1.1981	1.8368	0.9723	1.1912	1.6397	1.7591	1.7292	0.9287	0.5471	0.6124	1.233	1.4626	0.6237	0.7431	1.0277	0.7611	0.4805
1085	linolenate [alpha or gamma; (18:3n3 or 6)]	Lipid	Polyunsaturated Fatty Acid (n3 and n6)	34035	LC/MS Neg	100001337	5450	277.3		5280934	4444437	C06426	HMDB03073	1.1957	0.8557	0.6913	1.4325	2.2149	0.7812	1.2841	3.3027	2.981	2.6745	0.9436	0.3431	0.3821	1.0564	1.7165	0.4715	0.7775	1.4689	0.594	0.3892
77	lysine	Amino Acid	Lysine Metabolism	1301	LC/MS Pos	407	603	147.2	56-87-1	5962	5747	C00047	HMDB00182	0.9726	1.0655	1.0843	1.0025	1.0692	1.1528	0.7777	0.8559	0.7423	1.2981	0.7729	0.8901	1.4068	1.1004	0.8753	1.1893	1.3057	0.9587	0.9975	0.6575
1015	malate	Energy	TCA Cycle	1303	GC/MS	409	1502	233	6915-15-7	525	510	C00149	HMDB00156	0.9581	1.1093	1.3343	0.9523	0.9207	1.2772	0.6354	0.7993	0.7993	1.0419	1.818	0.8276	2.2387	0.6751	1.1262	0.6939	1.4925	1.2427	1.3628	0.6886
889	maltose	Carbohydrate	Glycogen Metabolism	15806	GC/MS	913	2142.1	204.1	6363-53-7	10991489	388469	C00208	HMDB00163	0.7771	1.0687	0.7136	1.2117	9.9973	1.3759	0.2663	0.5948	0.3633	7.6076	0.9313	0.5951	0.917	1.6536	4.7979	1.4063	16.6256	0.9091	2.9329	0.4848
884	maltotetraose	Carbohydrate	Glycogen Metabolism	15910	LC/MS Neg	100000275	965	665.1	34612-38-9	446495	393830	C02052	HMDB01296	0.9859	3.6195	0.9195	1.4288	5.1787	0.9858	0.3088	1	0.9069	3.4038	0.8467	0.3088	0.7833	0.3088	5.6503	0.3088	8.0804	1.0295	4.5398	0.7787
886	maltotriose	Carbohydrate	Glycogen Metabolism	15877	GC/MS	100000276	2419	204	1109-28-0	439586	388669	C01835	HMDB01262	1.1615	3.9476	1	0.6154	11.72	0.7735	0.3355	0.8128	0.5286	8.3034	1.5988	0.3355	0.9495	0.3609	7.9213	0.3355	14.8601	0.3355	4.826	0.5472
935	mannitol	Carbohydrate	Fructose, Mannose and Galactose Metabolism	15335	GC/MS	100000277	1839	319.1	69-65-8	6251	6015	C00392	HMDB00765	0.3753	0.232	1.4249	1.2637	1.3966	0.8327	1.5131	0.9515	0.6312	1.4207	0.8686	0.0937	1.0962	1.0485	1.2411	0.807	1.4302	0.8984	0.669	1.3556
931	mannose	Carbohydrate	Fructose, Mannose and Galactose Metabolism	584	GC/MS	803	1753.5	204	3458-28-4	18950	141983	C00159	HMDB00169	0.6614	2.8469	1.6244	2.239	1.8827	1.9596	1.6731	1.5563	1.2914	1.5192	0.8101	0.521	0.6007	0.6338	0.8919	0.67	0.4642	0.6413	0.6161	1.1081
932	mannose-6-phosphate	Carbohydrate	Fructose, Mannose and Galactose Metabolism	1470	GC/MS	294	2035.9	387.2	70442-25-0;104872-94-8	439198	19969422	C00275	HMDB01078	1.1936	3.1697	1.3033	0.943	0.7643	1.4502	0.6592	1.2643	0.8796	0.3774	1.7926	0.8191	2.9907	0.7096	0.8761	1.0112	0.211	1.4193	2.6983	0.9888
1046	margarate (17:0)	Lipid	Long Chain Fatty Acid	1121	LC/MS Neg	891	5733	269.3	506-12-7	10465	10033		HMDB02259	1.0761	0.9903	1.0097	1.0365	1.1331	1.1217	1.1311	1.0303	0.9527	1.0694	1.0622	0.6904	0.9478	0.8686	0.9668	0.769	0.8182	0.7614	1.0663	0.751
311	methionine	Amino Acid	Methionine, Cysteine, SAM and Taurine Metabolism	1302	LC/MS Pos	415	1252	150.1	63-68-3	6137	5907	C00073	HMDB00696	0.7339	1.1261	0.8317	0.7588	1.0725	1.0845	0.5069	0.794	0.8076	0.9681	0.886	1.6293	0.9387	1.2392	1.0319	1.5027	1.3449	0.8131	1.08	1.2104
316	methionine sulfoxide	Amino Acid	Methionine, Cysteine, SAM and Taurine Metabolism	18374	LC/MS Pos	100000039	729	166.1	3226-65-1	158980	139840	C02989	HMDB02005	1.4297	1.0701	0.5431	1.1794	1.2482	1.3049	0.7843	1.2273	0.7422	0.5431	0.5431	2.2644	1.552	1.7114	0.8061	0.9299	0.7307	0.8756	0.7963	0.5931
2707	methylphosphate	Nucleotide	Purine and Pyrimidine Metabolism	37070	GC/MS	100001805	1221	241	7023-27-0	13130	12578		HMDB61711	0.9396	2.0071	0.8835	1.0169	1.3015	0.9831	0.7414	0.8976	1.0283	0.8339	1.7821	0.8596	1.5127	0.8413	1.5054	0.8928	1.4391	1.7745	1.179	0.6536
1427	myo-inositol	Lipid	Inositol Metabolism	19934	GC/MS	363	1924.9	217	87-89-8	892	10239179	C00137	HMDB00211	1.2911	2.0413	1.0388	0.9891	1.4562	1.0649	0.8877	1.1607	1.0763	1.1102	2.7944	0.5371	0.7363	0.5022	0.9616	0.6621	0.8476	0.8907	0.7581	1.0109
1040	myristate (14:0)	Lipid	Long Chain Fatty Acid	1365	LC/MS Neg	519	5439	227.3	544-63-8	11005	10539	C06424	HMDB00806	1.0554	1.0064	0.7681	1.0694	0.9503	1.0807	0.9936	1.1567	0.9113	1.0935	0.775	0.9248	1.2047	1.0468	0.8629	0.9238	1.0696	1.1005	0.845	0.9274
1041	myristoleate (14:1n5)	Lipid	Long Chain Fatty Acid	32418	LC/MS Neg	100001198	5338	225.3	544-64-9	5281119	4444564	C08322	HMDB02000	0.8536	1.0035	0.7618	1.008	0.9387	1.014	0.8907	1.0144	0.7612	1.0414	1.143	0.6266	0.9595	1.1473	0.7367	1.4741	1.0326	1.1742	0.9965	0.7031
1267	myristoylcarnitine	Lipid	Fatty Acid Metabolism(Acyl Carnitine)	33952	LC/MS Pos	100001270	5113	372.4	18822-89-4	53477791	4932274		HMDB05066	0.6218	0.5733	2.1233	1.2101	1	0.9309	2.0544	1.9401	0.7842	1.2741	0.7615	1.1874	1.382	0.6861	0.7805	0.7427	0.8586	1.7955	0.5733	1.965
43	N-acetyl-aspartyl-glutamate (NAAG)	Amino Acid	Glutamate Metabolism	35665	LC/MS Pos	100001612	1563	305	3106-85-2	5255	5065	C12270	HMDB01067	0.883	1.4383	0.9419	1.0167	1.5272	0.9079	0.883	1.3001	0.9519	1.5045	1	0.883	0.883	0.883	0.9155	0.883	0.9546	0.883	0.883	1.1109
97	N-acetyl-cadaverine	Amino Acid	Lysine Metabolism	43530	LC/MS Pos	100002249	1245	145.2	32343-73-0					1.5138	1.4237	6.7033	0.4288	0.771	1.2039	0.842	0.4288	0.6634	1.158	0.4288	0.4288	6.6683	0.8234	0.4288	0.7241	1.5033	0.4288	0.6265	0.4288
26	N-acetylalanine	Amino Acid	Alanine and Aspartate Metabolism	1585	LC/MS Neg	1110	882	130.1	97-69-8	88064	79449	C02847	HMDB00766	0.6583	0.6753	0.5762	0.7523	0.9747	0.8179	0.5762	0.5762	0.5762	0.6261	0.9294	1.5894	1.233	1.1679	1.2291	1.3864	1.0029	1.1752	1	1.2559
32	N-acetylaspartate (NAA)	Amino Acid	Alanine and Aspartate Metabolism	22185	LC/MS Pos	100000787	1222	176.1	997-55-7;997-55-7	65065	58576	C01042	HMDB00812	1.1183	1.4012	0.9874	1.4268	1.217	1.4509	0.8963	1.4825	1.3572	1.2021	1.0126	0.9288	0.5143	0.6372	1.2211	0.9802	0.7803	0.9586	0.5058	0.7346
982	N-acetylgalactosamine	Carbohydrate	Aminosugar Metabolism	2766	GC/MS	1106	1887.4	245.1	14215-68-0	35717	32855	C01074	HMDB00212	0.8247	11.7487	2.8804	0.6621	1.1036	0.9047	0.4801	3.6285	0.4	0.4	0.4	0.4	0.4	0.9876	0.8592	0.4	1	2.7911	5.9442	1.0908
983	N-acetylmannosamine	Carbohydrate	Aminosugar Metabolism	15060	GC/MS	1217	1915.9	245.1	7772-94-3	439281	388414	C00140	HMDB01129	1.7695	1.4075	3.0923	0.4667	1.081	2.7068	1.5563	1.3456	0.842	0.7894	0.4626	0.6889	0.5512	0.3335	0.5252	1.5022	1.2062	1.0795	0.9205	0.6159
312	N-acetylmethionine	Amino Acid	Methionine, Cysteine, SAM and Taurine Metabolism	1589	LC/MS Neg	1083	1805	190.1	65-82-7	448580	395338	C02712	HMDB11745	0.9936	1.1678	0.874	0.9045	1.2794	1.2436	0.7396	0.7467	0.5351	1.1622	0.7791	1.0173	1.5585	0.7084	0.7629	1.0962	1.4081	1.0064	1.3436	0.5724
986	N-acetylneuraminate	Carbohydrate	Aminosugar Metabolism	32377	LC/MS Pos	1162	787	310	131-48-6	439197	10292217	C00270	HMDB00230	1.1963	2.0896	1.3644	0.5572	0.7305	1.4676	1.2784	1.3043	0.8367	0.3754	0.8662	0.3847	0.9796	0.4542	1.0387	0.506	1.0204	1.4218	1.1429	0.8036
10	N-acetylserine	Amino Acid	Glycine, Serine and Threonine Metabolism	37076	LC/MS Pos	100001851	1012	148	97-14-3	65249	58744		HMDB02931	0.5421	0.5469	1.1268	0.5277	0.8171	1.5775	0.5744	1.0576	0.6663	0.4789	0.6681	1.2499	1.6791	1.1435	0.9641	1.2813	1.0359	0.9412	1.2672	1.6652
15	N-acetylthreonine	Amino Acid	Glycine, Serine and Threonine Metabolism	33939	LC/MS Neg	100001274	846	160.1	17093-74-2	152204	3841173			0.9067	0.9067	0.9067	0.9067	0.9067	0.9067	0.9067	0.9067	0.9067	0.9067	0.9067	1.0964	0.9698	0.9408	0.9067	1	1.0977	0.9067	1.1192	0.9067
362	N-delta-acetylornithine*	Amino Acid	Urea cycle; Arginine and Proline Metabolism	43249	LC/MS Pos	100004523	836.2	175.1		9920500	8096135			1.0036	0.8524	2.0164	0.9964	1.3199	1.8094	1.4772	0.6232	0.6513	0.9746	1.2083	0.7671	2.6861	1.6491	0.9006	1.4985	0.9025	0.7653	0.5784	1.5192
1767	N-palmitoyl-sphingosine (d18:1/16:0)	Lipid	Sphingolipid Metabolism	44877	GC/MS	1518	2609	370.3	24696-26-2	5283564	4446677		HMDB04949	1.6243	1.7471	0.9963	0.6391	1.0057	1.3332	0.7679	0.8788	0.6862	0.6148	1.0102	0.2341	1.1355	1.1387	0.7316	0.8665	1.2736	1.5467	1.0037	0.3254
2600	N1-methyladenosine	Nucleotide	Purine Metabolism, Adenine containing	15650	LC/MS Pos	1242	1356	282.1	15763-06-1	27476	4573813	C02494	HMDB03331	0.7508	1.1701	0.9524	0.7545	1.0204	1.073	0.6937	0.8144	0.7148	0.8596	1.3271	1.5914	1.8863	0.6937	0.9878	2.4515	1.1188	0.9652	1	2.3685
2713	nicotinamide	Cofactors and Vitamins	Nicotinate and Nicotinamide Metabolism	594	LC/MS Pos	432	1267	123.1	98-92-0	936	911	C00153	HMDB01406	0.9961	1.4344	1.0039	0.9945	0.6321	1.3854	0.8648	1.2208	0.8296	0.8929	1.7043	1.066	0.8445	0.5705	0.7769	1.027	1.0084	1.381	0.9932	1.1097
2717	nicotinamide adenine dinucleotide (NAD+)	Cofactors and Vitamins	Nicotinate and Nicotinamide Metabolism	5278	LC/MS Pos	1310	1370	664	53-84-9	5893	5681	C00003	HMDB00902	0.8708	0.9276	0.9454	1.0355	0.9645	1.131	0.737	0.8958	0.8351	0.9381	19.9427	2.9496	1.2841	0.6924	2.5504	0.6885	9.9082	1.1388	2.5752	6.9796
2718	nicotinamide adenine dinucleotide reduced (NADH)	Cofactors and Vitamins	Nicotinate and Nicotinamide Metabolism	31475	LC/MS Neg	428	1554	664.1	58-68-4;606-68-8	439153	388299	C00004	HMDB01487	0.3524	0.3524	0.3524	0.3524	0.3524	0.3524	0.3524	0.3524	0.3524	0.3524	2.1624	0.5342	0.3524	0.3524	0.3524	0.3524	1.4658	0.3524	0.3524	0.3524
2710	nicotinate	Cofactors and Vitamins	Nicotinate and Nicotinamide Metabolism	1504	LC/MS Neg	567	1221	122.1	59-67-6	938	913	C00253	HMDB01488	1	1.2443	0.8977	0.9866	1.4785	0.5048	0.5048	0.5048	0.6034	1.249	1.2821	0.5048	0.6041	0.9789	1.1568	0.5048	0.6839	1.3908	1.5344	0.5048
1056	nonadecanoate (19:0)	Lipid	Long Chain Fatty Acid	1356	LC/MS Neg	892	6073	297.3	646-30-0	12591	12071	C16535	HMDB00772	1.3425	1.0874	1.0372	0.9979	1.0021	1.1932	1.1962	0.9073	0.8795	0.9657	1.5005	0.8207	1.3967	1.2173	0.756	0.8191	0.5915	0.9451	1.1534	0.9097
1261	octanoylcarnitine	Lipid	Fatty Acid Metabolism(Acyl Carnitine)	33936	LC/MS Pos	100001247	4100	288.3	3671-77-0	123701	110274	C02838	HMDB00791	0.2177	0.5333	1.1922	1.2079	0.2177	0.3251	0.5146	0.4932	0.5423	0.2484	0.8295	1.2566	1.1134	2.4921	0.7448	3.1922	1	2.0919	1.5386	1.2408
1050	oleate (18:1n9)	Lipid	Long Chain Fatty Acid	1359	GC/MS	442	1984.4	339.2	112-80-1	445639	393217	C00712	HMDB00207	1.045	0.9532	0.8441	0.9112	1.2116	0.8684	0.8014	1.3931	1.0638	1.0691	1.3587	0.7409	1.0733	1.0302	1.0519	0.798	0.9698	1.2597	0.8978	0.6471
1411	oleoyl ethanolamide	Lipid	Endocannabinoid	38102	LC/MS Neg	1137	6553	324.5	11-58-0;111-58-0	5283454	4446574		HMDB02088	1.1375	1.2865	0.6373	0.6732	0.8668	0.8194	0.6373	0.6811	0.6373	0.6373	1.2948	0.6373	1.3427	0.8558	0.9935	1.0065	1.2793	1.2613	1.2075	0.8883
1272	oleoylcarnitine	Lipid	Fatty Acid Metabolism(Acyl Carnitine)	35160	LC/MS Pos	100001501	5202	426.4	38677-66-6	6441392;53477789	21403150		HMDB05065	0.273	0.0506	0.1093	0.3467	1.1299	0.2342	0.0506	0.0506	0.0506	0.0506	0.8701	6.5815	3.0756	11.7239	2.1436	0.8611	4.2508	0.0506	2.0912	0.0506
409	ophthalmate	Amino Acid	Glutathione Metabolism	34592	LC/MS Pos	100001311	1457	290.1	495-27-2	7018721	7993181		HMDB05765	0.9477	1.7196	1.1915	0.7166	1.3992	1.5373	1.5049	1.0689	0.8844	0.8303	1.6172	0.7966	1.1564	0.6019	0.8424	0.8758	0.3064	1.0523	0.3274	1.2805
349	ornithine	Amino Acid	Urea cycle; Arginine and Proline Metabolism	1493	GC/MS	444	1763.8	142	3184-13-2	6262	6026	C00077	HMDB03374	0.5175	1.3062	0.9417	1.1802	0.8588	1.0583	0.74	0.7211	0.7394	1.1188	0.6535	1.4858	0.6668	2.7488	0.6077	1.3251	1.3156	1.3226	1.1421	0.8219
137	p-cresol sulfate	Amino Acid	Phenylalanine and Tyrosine Metabolism	36103	LC/MS Neg	100001315	2896	187.1	3233-57-7	4615423	3806480	C01468	HMDB11635	0.1706	0.1239	6.048	2.0574	0.1239	0.1239	5.4969	0.1963	0.2105	0.1239	0.1239	0.1239	3.1215	1.4981	0.1239	0.1239	0.1239	0.2144	0.5019	3.6402
1044	palmitoleate (16:1n7)	Lipid	Long Chain Fatty Acid	33447	LC/MS Neg	452	5477	253.3	373-49-9	445638	393216	C08362	HMDB03229	0.9098	0.964	0.5699	1.0368	1.3521	0.8742	1.0282	1.5479	0.9588	1.5636	0.815	0.6344	0.9718	1.3851	1.2571	1.0313	1.1808	1.3328	0.5941	0.4119
1414	palmitoyl ethanolamide	Lipid	Endocannabinoid	38165	LC/MS Neg	1489	6416	298.4	544-31-0	4671	4509	C16512	HMDB02100	0.9799	0.9895	0.8812	1.4802	1.2701	1.2751	0.6448	0.6448	0.6448	0.8665	1.0095	1.1709	0.9591	0.9905	0.9058	1.4542	1.3509	1.3054	0.9548	1.9586
1753	palmitoyl sphingomyelin (d18:1/16:0)	Lipid	Sphingolipid Metabolism	37506	GC/MS	100002107	2524	311.3	6254-89-3	9939941	8115562			0.7574	1.2497	0.8121	0.6646	0.9801	0.9409	0.5929	0.8175	0.7309	0.6949	2.1568	1.0247	1.2105	1.0253	1.0295	1.0739	1.402	1.4362	1.0199	0.8157
1269	palmitoylcarnitine	Lipid	Fatty Acid Metabolism(Acyl Carnitine)	22189	LC/MS Pos	100000776	5179	400.4	6865-14-1	461	448	C02990	HMDB00222	0.2378	0.0734	0.0734	0.2979	0.9289	0.1508	0.0734	0.0734	0.0734	0.1856	1.0711	2.927	1.2382	7.1132	1.1262	0.5219	2.4091	0.0734	1.9262	0.0734
2738	pantothenate	Cofactors and Vitamins	Pantothenate and CoA Metabolism	1508	LC/MS Pos	1024	2218	220.1	137-08-6	6613	6361	C00864	HMDB00210	1.5799	0.5076	0.6608	1.4577	2.137	0.4539	0.5422	0.9703	0.3666	0.6617	4.0062	1.0297	1.2837	0.536	2.0124	1.2553	0.6889	1.4161	1.6592	0.7264
3471	phenobarbital	Xenobiotics	Drug	27733	LC/MS Neg	100001045	3197	231.1	50-06-6	4763	4599	C07434	HMDB15305	0.7536	0.7536	0.7536	0.7536	0.7536	0.7536	0.7536	0.7536	0.7536	0.7536	1.2464	0.7536	0.7536	0.7536	0.7536	0.7536	0.7536	0.7536	0.7536	0.7536
134	phenol sulfate	Amino Acid	Phenylalanine and Tyrosine Metabolism	32553	LC/MS Neg	100001510	2150	173.1	937-34-8	74426	67018	C02180	HMDB60015	0.5113	0.3311	3.5893	6.051	1.8945	0.9793	1.8592	0.9406	0.5414	1.5131	0.538	0.5412	2.3299	1.1689	1.0283	0.602	0.6179	1.0207	0.7921	1.4375
117	phenylacetylglutamine	Amino Acid	Phenylalanine and Tyrosine Metabolism	35126	LC/MS Pos	100001417	2868	265.2	28047-15-6	92258	270643	C04148	HMDB06344	0.3446	0.3541	5.9856	2.8554	0.3446	0.487	2.8452	0.498	0.3446	0.9999	0.3446	0.3446	3.3061	2.0769	0.3446	0.4484	1	0.3446	0.3446	2.532
105	phenylalanine	Amino Acid	Phenylalanine and Tyrosine Metabolism	64	LC/MS Pos	460	2056	166.1	63-91-2	6140	5910	C00079	HMDB00159	0.912	1.1806	0.8947	0.7488	1.128	1.0606	0.6068	0.8533	0.5545	0.9687	1.0451	1.3555	1.2847	1.1413	0.8961	1.6205	1.5574	0.9678	1.0313	0.6308
1028	phosphate	Energy	Oxidative Phosphorylation	11438	GC/MS	461	1307.7	298.9	7664-38-2	1061	1032	C00009	HMDB01429	0.8945	0.9992	0.8236	0.7826	1.0994	1.1568	0.6991	0.7975	0.803	0.9842	1.5974	1.0008	1.5566	0.9773	1.2035	1.1821	1.5912	1.2212	1.3312	0.9742
836	phosphoenolpyruvate (PEP)	Carbohydrate	Glycolysis, Gluconeogenesis, and Pyruvate Metabolism	597	GC/MS	463	1595.4	369	10526-80-4	1005	980	C00074	HMDB00263	0.4343	0.0636	0.3236	2.1089	0.506	1.9502	0.3086	1.0592	0.4105	1.4354	3.3226	3.9497	0.0636	1.3042	0.1598	1.4374	0.9408	0.0636	2.16	0.1947
1461	phosphoethanolamine	Lipid	Phospholipid Metabolism	12102	GC/MS	1026	1577.3	299.1	1071-23-4	1015	990	C00346	HMDB00224	1.0007	1.0412	0.7787	1.0019	1.3158	1.1766	0.753	0.8455	0.6876	1.2762	2.3932	0.9815	0.9993	0.681	1.0727	0.9786	1.6657	0.9548	1.6793	0.924
95	pipecolate	Amino Acid	Lysine Metabolism	1444	LC/MS Pos	1025	1120	130.1	4043-87-2	849	826	C00408	HMDB00070	0.5558	0.5214	1.2425	0.5214	0.5836	1	0.5214	0.7806	1.111	0.5214	1.2972	0.73	2.5179	0.8254	0.7264	1.2028	0.9572	1.4307	1.9943	1.6208
1874	pregnen-diol disulfate*	Lipid	Steroid	32562	LC/MS Neg	100001993	3886	238.3						0.3873	0.9143	1.7119	4.0429	0.3873	0.6012	1.8616	1.0857	0.5377	0.3873	0.3873	0.608	0.7124	2.351	0.3873	0.3873	0.3873	1.0864	0.734	1.4654
370	pro-hydroxy-pro	Amino Acid	Urea cycle; Arginine and Proline Metabolism	35127	LC/MS Pos	100001167	960	229.2	18684-24-7	11673055	9847785		HMDB06695	0.529	0.5417	0.6688	0.7075	0.7024	0.9164	0.9915	0.5907	0.529	1.0347	0.7705	2.7493	2.0608	4.2225	2.2382	1.6581	2.2697	1.3872	1	1.2079
350	proline	Amino Acid	Urea cycle; Arginine and Proline Metabolism	1898	LC/MS Pos	480	796	116.1	147-85-3	145742	128566	C00148	HMDB00162	0.9436	0.6939	0.8805	0.8509	0.7831	1.0564	0.6722	0.6695	0.635	0.7267	1.5958	1.5748	2.2798	1.4442	1.5073	1.9393	1.7523	1.4123	3.8566	0.8054
1242	propionylcarnitine	Lipid	Fatty Acid Metabolism (also BCAA Metabolism)	32452	LC/MS Pos	100001162	1589	218.2	17298-37-2	107738	96904	C03017	HMDB00824	0.589	0.9265	1.1583	1.5314	1.0023	1.6902	1.2467	0.4623	0.7573	1.4332	0.6501	1.0931	3.1334	0.7789	0.9977	0.8417	1.6751	0.8331	1.3651	0.7146
1349	prostaglandin E2	Lipid	Eicosanoid	7746	LC/MS Neg	487	4562	351.3	363-24-6	5280360	4444059	C00584	HMDB01220	1.0198	0.4374	0.6316	0.4374	2.3258	1.1063	0.4374	0.4374	0.4374	0.6136	0.6449	0.4374	1	0.4605	1.0493	1.3787	0.4374	0.4374	0.4374	0.4374
3481	pseudoephedrine	Xenobiotics	Drug	39586	LC/MS Pos	100002738	2328.5	166.1	90-82-4	7028	6761	C02765	HMDB01943	0.4633	0.4633	0.4633	0.4633	0.7843	0.4633	0.4633	0.4633	1.8483	0.4633	0.4633	0.4633	0.4633	0.4633	0.4633	0.4633	0.4633	0.4633	1.2157	0.4633
2662	pseudouridine	Nucleotide	Pyrimidine Metabolism, Uracil containing	33442	LC/MS Pos	821	1180	245	1445-07-4	15047	21403010	C02067	HMDB00767	0.7334	1.0041	1.2261	0.8354	0.9026	1.237	1.0852	0.8735	0.6286	0.9132	0.8707	1.671	2.0431	1.6487	0.8973	1.6741	1.0302	0.8139	0.9959	1.0643
385	putrescine	Amino Acid	Polyamine Metabolism	1408	GC/MS	49	1705.8	174	110-60-1	1045	13837702	C00134	HMDB01414	0.9236	3.1555	2.0753	0.2638	0.83	1.1676	1.0764	1.2369	0.639	0.6829	2.6174	0.8022	4.8026	0.6326	0.4924	0.5981	2.5799	1.8418	1.6099	0.2484
50	pyroglutamine*	Amino Acid	Glutamate Metabolism	32672	LC/MS Pos	100001540	764	129.2	2353-44-8	134508	118562			0.6156	1.0619	1.0139	1.1413	0.2074	1.0135	0.4186	0.3865	0.5314	0.4356	0.7372	1.2324	5.0762	1.4666	0.3678	1.4877	2.3021	0.9865	2.1814	0.5898
2709	quinolinate	Cofactors and Vitamins	Nicotinate and Nicotinamide Metabolism	1899	GC/MS	182	1697.7	296.1	89-00-9	1066	1037	C03722	HMDB00232	0.3037	0.3037	0.3037	0.9959	0.3037	1.5903	0.3037	0.7049	0.6259	0.3037	0.791	1.0572	1.6532	1.2883	0.3037	2.0478	1	0.563	1.9752	0.3037
855	ribose	Carbohydrate	Pentose Metabolism	12080	GC/MS	914	1639.2	204	50-69-1	5779	4470639	C00121	HMDB00283	0.9055	2.3804	1.648	0.9349	1	1.4185	1.6875	0.9642	0.4934	0.5353	0.7867	0.5133	1.5454	1.3202	1.3968	0.8862	0.4934	1.8444	0.4934	0.4934
851	ribulose/xylulose 5-phosphate	Carbohydrate	Pentose Phosphate Pathway	37288	GC/MS	100002179	1935	357.2				C00199		0.8638	2.0854	1.0839	0.8636	1.1484	1.4712	0.9013	1.2106	1.2663	0.7747	0.9323	0.9915	0.9752	0.8588	0.9103	1.3396	0.7122	1.0085	1.1128	1.2167
319	S-adenosylhomocysteine (SAH)	Amino Acid	Methionine, Cysteine, SAM and Taurine Metabolism	15948	LC/MS Neg	197	1821	383.1	979-92-0	439155	16788012	C00021	HMDB00939	0.7958	1.0867	0.8146	0.6982	1.0452	1.0588	0.8279	0.7052	0.6277	0.9681	1.0319	1.1224	1.7974	0.9071	1.0367	1.2238	0.925	1.3352	1.4588	0.8009
405	S-lactoylglutathione	Amino Acid	Glutathione Metabolism	15731	LC/MS Neg	1343	1271	378.2	54398-03-7	440018	1053	C03451	HMDB01066	0.4338	0.4304	0.8037	0.4304	0.4304	0.4304	0.4304	0.6339	1.24	0.4304	2.6498	0.4304	2.5404	0.4304	5.216	0.5124	0.5991	1	4.4196	2.2156
331	S-methylcysteine	Amino Acid	Methionine, Cysteine, SAM and Taurine Metabolism	39592	LC/MS Pos	100002749	869.1	136	1187-84-4	24417	22826		HMDB02108	0.4392	1.0625	0.9157	0.9375	0.5516	1.3975	1.4938	4.3151	0.7177	0.4892	0.5222	1.2079	1.1248	1.2636	0.6785	1.9263	0.4737	8.2615	1.2399	0.8636
4	sarcosine (N-Methylglycine)	Amino Acid	Glycine, Serine and Threonine Metabolism	1516	GC/MS	1023	1182.9	116	107-97-1	1088	1057	C00213	HMDB00271	0.496	1.0549	1.6997	0.7336	2.4746	1.3	0.7552	0.546	0.5337	0.6984	0.8805	1.3155	3.2812	0.7628	1.3937	1.1995	1.6195	0.9451	1.4206	0.5473
1430	scyllo-inositol	Lipid	Inositol Metabolism	32379	GC/MS	100001215	1893.8	318.2	488-59-5	892	10254646	C06153	HMDB06088	1.6976	2.2705	0.555	1.3686	2.2472	1.0082	0.6839	1.9627	0.9918	1.2055	4.098	0.3558	0.4053	0.5418	1.2913	0.5401	0.8969	1.9732	0.8481	0.61
849	sedoheptulose-7-phosphate	Carbohydrate	Pentose Phosphate Pathway	35649	GC/MS	100001628	2070	691.35	2646-35-7	616	596	C05382	HMDB01068	0.7137	2.5972	1.0122	0.257	1.4274	1.03	0.9547	1.8876	0.7301	0.6934	1.1068	1.461	1.1021	0.8633	1.0579	0.7838	0.8441	0.9878	0.7774	2.0751
9	serine	Amino Acid	Glycine, Serine and Threonine Metabolism	1648	GC/MS	503	1389.1	204	56-45-1	5951	5736	C00065	HMDB00187	0.661	1.2998	0.8148	0.7839	1.0814	1.1341	0.5641	0.9949	1.0051	1.0192	0.8358	1.383	1.2986	0.9022	0.8712	1.154	1.1934	0.9857	1.2054	0.848
234	serotonin	Amino Acid	Tryptophan Metabolism	2342	LC/MS Pos	504	1660	177.1	153-98-0	5202	5013	C00780	HMDB00259	1.0253	1.2258	1.2098	0.6629	0.7778	4.2837	1.577	2.6856	1.3368	0.572	0.5151	0.1314	0.3226	0.1893	0.9055	1.4574	0.1314	0.9747	0.1314	1.1178
928	sorbitol	Carbohydrate	Fructose, Mannose and Galactose Metabolism	15053	GC/MS	506	1843	319.1	6706-59-8	5780	96680	C00794	HMDB00247	1.3904	0.5212	1.182	0.7964	1.223	1	0.7619	0.5212	0.9625	1.809	2.3213	0.5425	2.1657	0.7823	1.9849	0.9804	1.5246	0.5877	2.6536	0.5473
388	spermidine	Amino Acid	Polyamine Metabolism	485	LC/MS Pos	50	533	146.2	124-20-9	1102	1071	C00315	HMDB01257	0.7707	3.5301	1.7531	0.5422	0.4761	0.9245	3.8489	1.5274	0.6409	0.3943	1.1209	1.3317	2.0058	0.5778	0.9067	0.9902	1.0098	3.7492	0.8012	1.4556
386	spermine	Amino Acid	Polyamine Metabolism	603	LC/MS Pos	507	506	203.2	71-44-3	1103	1072	C00750	HMDB01256	0.6205	12.9302	3.276	0.3449	0.3391	1	4.2003	1.8921	0.8115	0.3391	0.3391	0.5311	2.0422	0.4008	0.5449	1.1626	0.3391	7.5256	0.7893	2.6664
1750	sphinganine	Lipid	Sphingolipid Metabolism	17769	LC/MS Pos	313	5175	302.3	3102-56-5	3126	3014	C00836	HMDB00269	0.8685	0.1543	0.1543	0.6042	2.7405	0.9359	0.1543	0.1543	0.3914	0.7953	1	1.0667	1.9317	3.4996	3.0984	0.295	5.7913	0.1543	2.3387	0.1543
1759	sphingosine	Lipid	Sphingolipid Metabolism	17747	LC/MS Pos	297	5197	300.2	123-78-4	5353955	4510275	C00319	HMDB00252	0.5941	0.0638	0.0638	0.2061	0.9994	0.4286	0.0638	0.0638	0.0638	0.2792	1.0723	1.3107	1.0006	2.5421	1.5329	0.2308	4.2899	0.0638	1.13	0.0638
3195	stachydrine	Xenobiotics	Food Component/Plant	34384	LC/MS Pos	100001296	860	144.1	4136-37-2	115244	103115	C10172	HMDB04827	0.3488	2.289	3.2057	3.0061	0.2069	0.9102	1.7353	0.3511	0.4826	0.1071	0.3547	2.4311	2.8057	3.4249	0.1926	1.0898	0.1415	0.4145	1.2452	1.5438
1754	stearoyl sphingomyelin (d18:1/18:0)	Lipid	Sphingolipid Metabolism	19503	GC/MS	1538	2645	311.3	85187-10-6;85187-10-6	6453725	4956085	C00550	HMDB01348	0.6943	1.4641	1.0469	0.9531	1.3969	1.2073	0.7869	1.3303	1.1234	1.09	0.6758	1.2721	0.4432	0.5373	0.9281	1.2888	0.5078	0.5578	0.3129	2.2701
1270	stearoylcarnitine	Lipid	Fatty Acid Metabolism(Acyl Carnitine)	34409	LC/MS Pos	100001391	5300	428.4	18822-91-8	6426855	21233653		HMDB00848	0.2457	0.0691	0.0691	0.4502	1.3043	0.2447	0.0691	0.0691	0.0691	0.3427	1.1514	2.4067	2.0042	11.9307	0.8486	0.3016	1.8124	0.0691	2.9235	0.0691
1013	succinate	Energy	TCA Cycle	1437	LC/MS Neg	252	618	117.1	110-15-6	1110	1078	C00042	HMDB00254	0.4044	0.4451	0.4124	0.6521	0.4914	0.6915	1.9898	0.4431	0.5152	0.8397	1.1603	2.0733	5.3096	3.7727	1.527	1.3368	10.9773	2.4259	2.7504	0.6849
1012	succinylcarnitine	Energy	TCA Cycle	37058	LC/MS Pos	100001948	1401	262.1						1.9237	1.4692	0.4908	0.8032	1.2192	0.9145	1.1525	0.7843	0.4908	0.5789	2.1678	0.9468	2.5921	0.9861	0.9704	1.0033	1	2.1962	1.2021	0.8752
338	taurine	Amino Acid	Methionine, Cysteine, SAM and Taurine Metabolism	32975	LC/MS Pos	512	687	126.1	107-35-7	1123	1091	C00245	HMDB00251	0.8093	0.9348	0.7142	0.779	0.7584	0.5846	0.6116	0.7158	0.8232	0.6988	1.245	1.747	2.6555	1.7716	1.1056	1.545	1.3797	1.1534	1.0652	1.5835
1973	taurochenodeoxycholate	Lipid	Primary Bile Acid Metabolism	18494	LC/MS Neg	1629	5218	498.3	6009-98-9	387316	343282	C05465	HMDB00951	0.9635	0.9635	0.9635	1	0.9635	0.9635	0.9635	0.9635	0.9635	1.0191	0.9635	0.9635	0.9635	0.9718	0.9635	0.9635	2.0905	0.9635	0.9635	0.9635
1970	taurocholate	Lipid	Primary Bile Acid Metabolism	18497	LC/MS Neg	1648	5122	514.3	145-42-6	6675		C05122	HMDB00036	0.2683	0.2683	0.2683	0.2683	0.2683	0.2683	0.2683	0.2683	0.2683	1	0.2683	0.2683	0.2683	0.2683	0.2683	0.2683	2.0853	0.2683	0.2683	0.2683
2016	taurocholenate sulfate*	Lipid	Secondary Bile Acid Metabolism	32807	LC/MS Neg	100001990	4762	279.8						0.2139	0.2139	0.2139	0.2139	0.2139	0.2139	0.2139	0.2139	0.2139	1	0.2139	0.2139	0.2139	0.2139	0.2139	0.2139	1.4133	0.2139	0.2139	0.2139
1988	taurodeoxycholate	Lipid	Secondary Bile Acid Metabolism	12261	LC/MS Neg	1668	5243	498.3	207737-97-1	2733768	2015539	C05463	HMDB00896	0.5318	0.5318	0.5318	0.5318	0.5318	0.5318	0.5318	0.5318	0.5318	1.3792	0.5318	0.5318	0.5318	0.6208	0.5318	0.5318	1.9456	0.5318	0.5318	0.5318
2748	threonate	Cofactors and Vitamins	Ascorbate and Aldarate Metabolism	27738	GC/MS	100001022	1560.7	292.1	70753-61-6	151152	133224	C01620	HMDB00943	0.9625	1.0687	0.401	2.2079	1.2825	2.1676	2.0851	1.7997	1.0362	0.9988	0.8169	1.9262	0.5085	0.9335	0.3678	1.0012	0.3471	1.1188	0.3269	0.2339
14	threonine	Amino Acid	Glycine, Serine and Threonine Metabolism	1284	LC/MS Pos	564	713	120.1	72-19-5	6288	6051	C00188	HMDB00167	0.6806	0.9555	0.6671	0.8738	1.0753	1.0394	0.561	0.9458	0.9606	1.1984	0.7111	1.6463	1.0648	1.6427	0.9321	1.4285	1.7036	1.3938	1.6306	0.8261
719	threonylphenylalanine	Peptide	Dipeptide	31530	LC/MS Pos	100001125	2500	267.2	16875-27-7	4099799;4099798	3313819			1.0625	9.5869	1.9521	0.6051	0.6051	0.6051	0.6051	0.7085	0.6051	0.6051	1.3532	0.6051	1.795	0.7922	0.7855	0.6476	0.9375	4.5514	0.6051	0.6051
2703	thymine	Nucleotide	Pyrimidine Metabolism, Thymine containing	604	GC/MS	882	1429.1	255	65-71-4	1135	1103	C00178	HMDB00262	1.1861	3.1196	1.9207	0.8705	0.7561	0.9391	0.5561	1.3027	0.1857	0.78	0.8231	0.4091	3.3307	2.0664	1.0609	1.128	2.0669	0.9277	1.6806	0.5369
368	trans-4-hydroxyproline	Amino Acid	Urea cycle; Arginine and Proline Metabolism	1366	GC/MS	1001	1537	140	51-35-4	5810	5605	C01157	HMDB00725	0.5048	0.7254	0.9062	0.8019	0.548	1.0938	0.6795	0.5823	0.6407	0.5523	0.6347	3.1713	2.1333	2.3038	1.2397	1.7775	1.442	1.5286	1.5368	1.1946
63	trans-urocanate	Amino Acid	Histidine Metabolism	607	LC/MS Pos	537	1119	139.1	104-98-3	736715	643824	C00785	HMDB00301	0.9659	0.6751	1.1095	0.2893	0.2893	0.8768	0.2893	0.8254	0.8199	1.0884	0.2893	1.0513	1.3135	0.6254	0.2893	1.0341	1.0911	0.2893	0.2893	1.081
3700	trizma acetate	Xenobiotics	Chemical	20710	GC/MS	100000856	1525	306.2	6850-28-8	6503	73346	C07182		1.6868	1.4551	5.9081	0.9265	0.7585	1	0.7845	0.2095	0.2859	1.9429	0.6346	0.1845	1.7273	6.1655	1.2163	2.2232	0.2913	0.1845	1.5234	0.5879
208	tryptophan	Amino Acid	Tryptophan Metabolism	54	LC/MS Pos	565	2445	205.1	73-22-3	6305	6066	C00078	HMDB00929	0.9492	1.0043	0.9957	0.91	0.9756	1.1084	0.6615	0.7408	0.5017	1.0433	1.1162	1.4586	1.4419	1.4852	0.7861	1.5418	1.5126	1.0582	0.8218	0.7897
242	tryptophan betaine	Amino Acid	Tryptophan Metabolism	37097	LC/MS Pos	100001743	2464	247.1	20671-76-5	442106	390633	C09213	HMDB61115	0.2932	0.6315	0.3314	0.639	1.7337	1.216	1.6012	0.8011	1.0309	0.9054	0.1914	1.3486	0.8824	0.8855	1.854	1.1966	1.2524	1.3933	1.8964	0.9691
118	tyrosine	Amino Acid	Phenylalanine and Tyrosine Metabolism	1299	LC/MS Pos	815	1516	182.1	60-18-4	6057	5833	C00082	HMDB00158	0.7024	0.9975	0.8211	0.7854	1.2333	1.0703	0.526	0.6703	0.5844	1.0025	1.0296	1.3384	1.1655	1.1495	0.936	1.6254	1.2689	0.871	1.0703	0.6823
964	UDP-acetylglucosamine/galactosamine	Carbohydrate	Nucleotide Sugar	38673	LC/MS Pos	100002957	963	607.7						0.5544	0.622	0.1996	0.7931	0.7464	1.1449	0.5186	0.477	0.5165	0.9812	2.672	1.6341	2.2971	1.2801	1.5695	0.8081	1.5098	2.0498	3.4586	1.0188
957	UDP-galactose	Carbohydrate	Nucleotide Sugar	15860	GC/MS	100000298	1973	243.1	2956-16-3;91183-98-1;137868-52-1	18068	17069	C00052	HMDB00302	0.3846	1.8727	0.8449	0.9978	1.6415	0.7309	0.2971	1	0.2971	1.0027	1.4226	0.5466	1.678	0.575	0.7007	0.2971	2.3207	1.8191	2.3345	0.2971
953	UDP-glucose	Carbohydrate	Nucleotide Sugar	32344	GC/MS	1096	1986	243.1	117756-22-6	8629	8308	C00029	HMDB00286	1.0499	2.1558	0.795	1.0003	1.4136	1.0213	0.3669	1.2103	0.4962	0.9997	1.3409	0.2924	1.4582	0.534	0.5797	0.294	0.9104	1.8071	1.4955	0.3735
958	UDP-glucuronate	Carbohydrate	Nucleotide Sugar	2763	LC/MS Neg	1097	594	579.1	28053-08-9;63700-19-6	17473	16522	C00167	HMDB00935	1.104	1.386	0.646	0.8378	1.1021	1.2511	0.8178	0.8979	0.4848	0.8353	2.1622	0.3374	1.8533	0.5459	1.6434	0.4136	1.7336	1.903	1.835	0.4815
2661	uracil	Nucleotide	Pyrimidine Metabolism, Uracil containing	605	GC/MS	825	1370.4	241	66-22-8	1174	1141	C00106	HMDB00300	0.9228	0.4403	1.1232	0.5839	0.8633	0.9154	0.6971	0.3363	0.2835	1.1917	1.4059	1.4407	2.9646	0.9437	1.0563	1.1641	2.2748	1.0905	1.1712	0.3298
2581	urate	Nucleotide	Purine Metabolism, (Hypo)Xanthine/Inosine containing	1604	LC/MS Neg	1134	769	167.1	69-93-2;120K5305	1175		C00366	HMDB00289	0.4232	1.2702	1.2128	1.3354	1.0103	1.2063	1.252	1.1662	0.4297	0.7504	0.3805	0.9897	0.5551	1.2893	0.5939	1.1263	0.2568	0.8698	0.2969	1.0339
347	urea	Amino Acid	Urea cycle; Arginine and Proline Metabolism	1670	GC/MS	533	1223.9	171	57-13-6	1176	1143	C00086	HMDB00294	1.1042	1.1437	3.0249	0.9488	0.7871	0.8396	1.0512	0.3951	0.206	1.6332	2.0758	1.0705	2.5521	0.9281	0.8189	0.9066	2.0361	0.3743	0.2851	1.357
2660	uridine	Nucleotide	Pyrimidine Metabolism, Uracil containing	606	LC/MS Neg	535	1430	243.1	58-96-8	6029	5807	C00299	HMDB00296	0.993	2.3708	1.0153	0.7319	1.2309	1.2877	0.8734	1.3393	0.9441	0.8011	1.007	0.9509	0.8347	1.0165	1.0518	0.8725	0.5926	1.1556	0.6039	1.0505
2656	uridine monophosphate (5' or 3')	Nucleotide	Pyrimidine Metabolism, Uracil containing	39879	LC/MS Pos	100003366	1079	325	58-97-9	6030			HMDB00288	1.2132	2.1413	0.1639	0.9315	1.1175	1.1017	1	0.5867	0.6854	0.5215	2.3986	0.067	1.5573	0.1243	0.9506	0.067	1.526	1.992	1.5661	0.1169
1259	valerylcarnitine	Lipid	Fatty Acid Metabolism(Acyl Carnitine)	34406	LC/MS Pos	100001394	2584	246.2		6426903	4932322		HMDB13128	0.3943	1.049	2.9725	2.0789	0.5615	1.1958	3.0396	0.2742	3.2035	1.0571	0.5648	0.8386	5.353	0.6307	0.951	0.527	1.7889	0.491	10.1206	0.7445
295	valine	Amino Acid	Leucine, Isoleucine and Valine Metabolism	1649	LC/MS Pos	566	1040	118.1	72-18-4	6287	6050	C00183	HMDB00883	0.7106	0.9338	0.9487	0.9106	1.0298	1.4054	0.7747	0.8055	0.4458	1.3586	0.9744	1.2807	1.4785	1.3376	0.9184	1.7565	1.8754	1.0888	1.0256	0.8506
787	VGAHAGEYGAEALER*	Peptide	Polypeptide	35211	LC/MS Pos	100001599	2542	765.8			21403180			2.3642	1.0189	4.271	4.8775	0.253	3.0682	7.5032	3.0901	0.7339	1.5005	0.1736	0.3767	0.1428	0.355	0.2485	0.9811	0.1701	2.2954	0.1428	0.1428
2574	xanthine	Nucleotide	Purine Metabolism, (Hypo)Xanthine/Inosine containing	3147	LC/MS Pos	1004	1430	153.1	69-89-6	1188	1151	C00385	HMDB00292	0.9867	1.0133	1.0134	0.704	1.1981	0.8966	0.5579	0.7106	0.7991	0.9318	1.2625	1.1119	1.2492	1.217	1.0828	1.6514	1.0266	0.7826	0.9299	0.5532
2576	xanthosine	Nucleotide	Purine Metabolism, (Hypo)Xanthine/Inosine containing	15136	LC/MS Pos	100000299	1785	285	146-80-5	64959	58484	C01762	HMDB00299	0.4551	0.5695	0.7978	0.4551	0.4551	0.4551	0.4551	0.4551	0.4551	0.4551	0.8785	2.0069	1.3966	1.0179	0.4551	2.5897	1	0.465	1.1209	0.4551
862	xylitol	Carbohydrate	Pentose Metabolism	4966	GC/MS	543	1677.6	307.2	87-99-0	6912	6646	C00379	HMDB02917	0.8507	0.9836	0.8247	0.8139	0.7891	1.0164	0.4981	0.5017	0.5602	0.4342	1.2926	1.6511	1.7714	1.6135	1.0571	1.3666	1.2944	1.2611	1.2263	0.7463
860	xylonate	Carbohydrate	Pentose Metabolism	35638	GC/MS	100001627	1722	292	73686-31-7	6602431	5034782	C05411	HMDB60256	0.9699	1.5415	1.2353	0.4995	0.9821	0.2379	0.2379	0.5935	0.5037	0.2379	1.362	1.2401	1.8795	1.0179	0.7371	1.1093	1.0351	0.9394	0.9434	1.291
