# Supplementary material for: Tissue metabolic profiling reveals major metabolic alteration in colorectal cancer
Source: Royal Society of Chemistry journal article supplement (doi:10.1039/d1mo00022e), 2021-03-26
Supplement: d1mo00022e2.pdf [file d1mo00022e2.pdf]

## Supplementary

**Table 1 meta data of patients**

| number | Patient ID    | gender         | age   | TNM                      |
|--------|---------------|----------------|-------|--------------------------|
| 1      | C29639        | female         | 66    | AJCC pT3N1b              |
| 2      | C29648        | male           | 57    | AJCC pT3N1b              |
| 3      | C29761        | male           | 84    | AJCC pT3N2a              |
| 4      | C29788        | male           | 87    | AJCC pT3 (2) N1a         |
| 5      | C29658        | female         | 48    | AJCC pT3N1c              |
| 6      | C29773        | female         | 45    | AJCC pT3N2a              |
| 7      | C33136T/154N* | female/ female | 64/52 | AJCC pT3N2b/ AJCC pT3N2b |
| 8      | C33256        | female         | 33    | AJCC pT4aN1a             |
| 9      | 156           | male           | 58    | AJCC pT3N2a              |
| 10     | 158           | male           | 69    | AJCC pT4aN1a             |

\* this pair is not from one patient. T: tumor; N: normal

## Method

### GC-MS

A capillary GC/MS system, Agilent model 7890-5975 (Agilent, MA, USA), equipped with a Class 5000 data processing system, was used. The capillary column was a fused-silica DB-5 one (30 m 3 0.25 mm i.d.) with a 0.25-mm film thickness of 5% phenylmethylsilicone. Mass spectra were obtained by standard electron impact ionization scanning from  $m/z$  50 to  $m/z$  750 at a rate of 0.35 s/cycle. The temperature program was started at 150°C with an initial holding for 1 min, and was then increased at a rate of 10°C /min to 285°C with a final holding for 8 min. The temperatures of the injection port and transfer line were both 280°C. Flow rate of the helium carrier was 1.5 ml/min, and the linear velocity was 38.5 m/s. One ml of the final derivatized aliquot was injected into the GC/MS and analyzed in

the split mode (10:1).

### Figure1

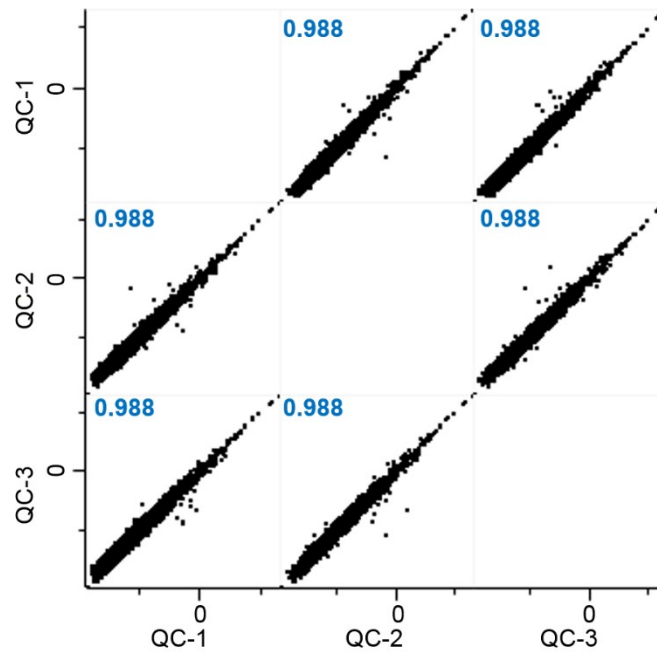

Figure 1 Pearson correlation analysis of QC samples  
the value greater than 0.9 shows good correlation
